# Supplementary material for: Weak arene/nickel interaction lights on monoarylation of alcohols
Source: Research Square preprint supplement (doi:10.21203/rs.3.rs-771338/v1), 2021-08-11
Supplement: Supplementary file 1 [file cc4b9c7bfd003e0c6c46e86d.docx]

**nature portfolio**

| **Supplementary Information** |
| --- |
| **Weak arene/nickel interaction lights on monoarylation of alcohols** |

In the format provided by the

authors and unedited

**Weak arene/nickel interaction lights on monoarylation of alcohols**

Kun Xie1, Ge Meng1, Jun He2, Mingsong Shi2, Junjie Ma1, Huan Gao1, Tingting Qiu1, Yuxia Zhao1, Shuang Yang1, Xinyu Wei1, Jiaxin Yan1, Kang Wang1, Jiadong Cai1, Sheng Li1, Dong Xue1 and Zhiyan Huang1*

*1Key Laboratory of Applied Surface and Colloid Chemistry, Ministry of Education, Key Laboratory of the Ministry of Education for Medicinal Resources and Natural Pharmaceutical Chemistry, National Engineering Laboratory for Resource Development of Endangered Crude Drugs in Northwest of China, Key Laboratory of Macromolecular Science of Shaanxi Province and School of Chemistry and Chemical Engineering, Shaanxi Normal University (SNNU), Xi’an, 710119, China.*

*2State Key Laboratory of Biotherapy and Cancer Center/Collaborative Innovation Center for Biotherapy, West China Hospital, Sichuan University, Chengdu 610041, China.*

**zyhuang@snnu.edu.cn*

Table of contents

[1. General Information 2](#_Toc78728120)

[2. Preparation of photocatalysts and substrates 4](#_Toc78728121)

[3. The photophysical and electrochemical properties of photocatalysts 8](#_Toc78728122)

[4. Optimization of reaction conditions 14](#_Toc78728123)

[5. General procedure for arylation of alcohols 19](#_Toc78728124)

[6. Substrate Scope 20](#_Toc78728125)

[7. Synthetic Applications 50](#_Toc78728126)

[8. Mechanistic investigations 61](#_Toc78728127)

[9. Computational Details 72](#_Toc78728128)

[10. X-Ray Diffraction Analysis 76](#_Toc78728129)

[11. References 82](#_Toc78728130)

[12. NMR Spectra 84](#_Toc78728131)

**List of abbreviations**

| DABCO | 1,4-diazabicyclo[2.2.2]octanetriethylenediamine |
| --- | --- |
| DBU | 1,8-diazabicyclo[5.4.0]undec-7-ene |
| DCE | dichloroethane |
| DCM | dichloromethane |
| DCyA | *N,N*-dicyclohexylamine |
| DCyMA | *N,N*-dicyclohexylmethylamine |
| DECyA | *N,N*-diethylcyclohexylamine |
| DEF | *N,N*-diethylformamide |
| DIPEA | *N,N*-diisopropylethylamine |
| DMA | *N,N*-dimethylacetamide |
| DMAP | 4-dimethylaminopyridine |
| DMCyA | *N,N*-dimethylcyclohexylamine |
| DME | 1,2-dimethoxyethane |
| DMF | dimethylformamide |
| DMIPA | *N,N*-dimethylisopropylamine |
| DMSO | dimethyl sulfoxide |
| HMTA | hexamethylenetetramine |
| MeCN | acetonitrile |
| MeOH | methanol |
| PE | petroleum ether (60-90°C) |
| PTSA⋅H2O | *p*-toluenesulfonic acid monohydrate |
| TBAPF6 | tetrabutylammonium hexafluorophosphate |
| TEA | triethylamine |
| THF | tetrahydrofuran |
| Tol | toluene |
| TPP | 5,10,15,20-tetraphenylporphyrin |

# 1. General Information

**General Procedure:** Unless otherwise specified, all reactions were carried out with rigorous exclusion of air and moisture. Reactions were monitored by thin-layer (TLC) on precoated Silica Gel 60 F254 plates and gas chromatography (GC, Thermo trace 1310), visualizing with UV light (254 or 365 nm) or phosphomolybdic acid as a staining reagent. The organic solution was concentrated under reduced pressure using a rotary evaporator. Automated column chromatography was performed using silica gel (200-300 mesh) with distilled petroleum ether and ethyl acetate.

**Solvents and reagents:** Unless otherwise specified, all chemical reagents were purchased from commercial suppliers and used without further purification. Solvents were purified by using the following methods: Ether solvents, such as THF, DME and dioxane were dried and deoxygenated by distillation over sodium with benzophenone as an indicator under nitrogen atmosphere. DCM and DMF were distilled from CaH2 under nitrogen atmosphere. Distilled solvents were stored over activated 4 Å molecular sieves in Schlenk tubes in the glove box degassed by nitrogen bubbling before use. NiBr2 was purchased from Sigma Aldrich and other nickel salts were purchased from Alfa Aesar. (Hetero-)Aryl bromides were purchased from Adamas. Alcohols were purchased from Adamas and TCI. The GC internal standard, *n*-dodecane was degassed and dried over by activated 4 Å molecular sieves before use.

**Instruments:** 1H NMR spectra were acquired at 400 MHz or 600 MHz instruments (Bruker Advance spectrometer and JEOL spectrometer) and chemical shifts were recorded relative to SiMe4 (TMS: δ 0.00 ppm) or residual protiated solvents (CDCl3: δ 7.26 ppm; DMSO-*d*6: δ 2.50 ppm). 1H NMR data were reported as follows: chemical shift, multiplicity (s = singlet, d = doublet, t = triplet, q = quartet, m = multiplet, dd = doublet of doublets, dt = doublet of triplets, ddd = doublet of doublet of doublets, ddt = doublet of doublet of triplets, td = triplet of doublets, br = broad), the number of protons (n) for a given resonance was indicated by *n*H. Coupling constants were reported as a *J* value in Hz. 13C NMR spectra were obtained at 100 MHz on 400 MHz or 150 MHz on 600 MHz instruments and chemical shifts were recorded in ppm relative to solvent resonance (CDCl3: δ 77.16 ppm; DMSO-*d6*: δ 39.52 ppm). Proof of purity of new compounds were assessed by using copies of 1H, 13C, 11B and 19F NMR spectra. HRMS data were obtained on a Thermo Scientific LTQ Orbitrap Discovery spectrometer (Bremen, Germany). GC analysis was conducted with Agilent J&W GC column (30 m × 0.32 mm, 1.00 μm, DB-1). Chiral HPLC analysis was performed on a Shimadzu LC-20AD instrument. Preparative chromatography was performed on an Agilent 1260 Infinity instrument. Optical rotation was measured using an Autopol IV equipped with a sodium vapor lamp at 589 nm and the concentration of samples was denoted as c (g/100 mL, CHCl3 or MeOH). Single crystal was collected on Bruker CMOS PHOTON 100 detector. The UV-vis absorption spectra were recorded on a TU-1950 recording spectrophotometer in a 1 cm quartz cuvette. Photoluminescence (PL) spectra were measured on a Hitachi F-7100 fluorescence spectrophotometer in a 1 cm quartz cuvette. The absolute PL quantum yields were measured using a Hamamatsu C9920-02G integrating sphere system coupled with a 150 W Xenon lamp and a PMA-12 photonic multichannel analyzer. Fluorescence lifetimes were obtained on an FLS 1000 instrument in DCM (1 ×10-5 M) in a 1 cm quartz cuvette. Cyclic voltammetry (CV) was carried out using nitrogen-purged anhydrous DCM for the oxidation and reduction scan at room temperature with a CHI voltammetric analyzer. TBAPF6 (0.1 M) was used as the supporting electrolyte. The conventional there-electrode configuration consists of a 0.07 cm2 glassy-carbon electrode as the working electrode, a platinum wire as auxiliary electrode, and Ag/AgCl (saturated KCl) as a reference electrode. Cyclic voltammograms were recorded at a scan rate of 100 mV/s.

The light source (white, 6000-6500 K) were purchased from WATTCASTM, and relevant experiments were performed in a WATTECS WP-TEC-1020 parallel reactor.

**Light Output**

Emission spectra were measured on a photocatalytic spectrometer (PCS-230850). Emission spectrum from a 2 W white LED with emission maximum at λmax = 448 nm.


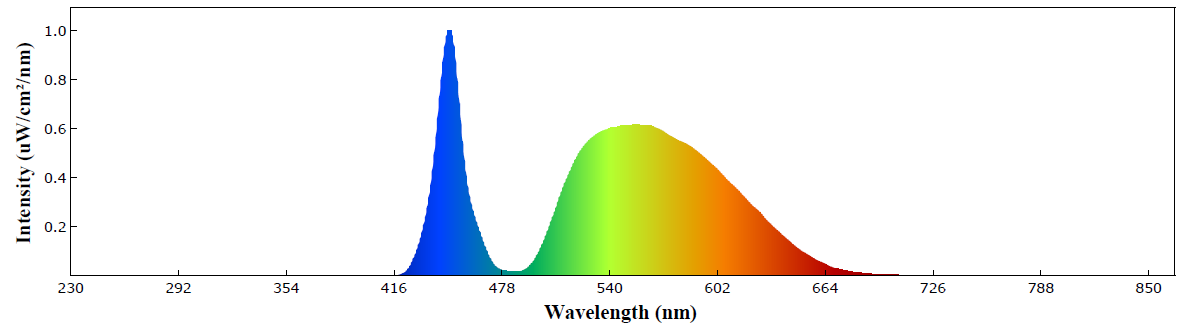


**Figure S1.** Emission spectrum for light source.

# 2. Preparation of photocatalysts and substrates

**2.1 Preparation of photocatalysts**

**Scheme S1.** Synthesis of DABDP photocatalysts.

**2.1.1 Synthesis of Et-BDP [****131083-16-4]**

**Et-BDP** was synthesized according to a reported procedure with slightly modification1. Acetyl chloride (4.8 g, 60.5 mmol, 2.33 eq) was added dropwise to a stirred solution of 2,4-dimethyl-3-ethyl-1H-pyrrole (3.2 g, 26.0 mmol, 1.0 eq) in dry DCM (20 mL) at room temperature under nitrogen atmosphere. The deep red solution was heated to reflux for 1 h. After cooling and concentrated to dryness using vacuum rotary evaporator, *n*-hexane (50 mL), DCM (120 mL) and TEA (7.6 g, 75.0 mmol, 2.88 eq) were added to the residual mixture. The mixture was stirred at room temperature for 10 min, and then BF3·Et2O (16.0 g, 112.5 mmol, 4.32 eq) was added dropwise and stirred for 1 h at room temperature. The deep red solution was washed with saturated aqueous Na2CO3 solution (3 × 100 mL), dried over anhydrous Na2SO4, filtrated and concentrated using a rotary evaporator. The residue was purified by a column chromatography (PE/DCM = 3:1) to give the desired compound **Et-BDP** as a reddish orange solid (2.2 g, 53%). Data are as follows and matching with the previous literature1.

1H NMR (400 MHz, CDCl3): δ 2.60 (s, 3H), 2.49 (s, 6H), 2.39 (q, *J* = 7.6 Hz, 4H), 2.33 (s, 6H), 1.04 (t, *J* = 7.5 Hz, 6H).

**2.1.2 Synthesis of Et-DABDP**


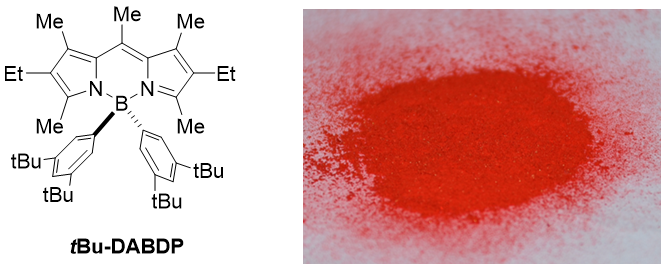


(3,5-Di-*tert*-butylphenyl) magnesium bromide (0.4 M in THF, 10 mL, 4.0 mmol) was added dropwise to a solution of **Et-BDP** (63.64 mg, 0.2 mmol) in dry DCM (40.0 mL) at room temperature under nitrogen atmosphere. The mixture was stirred at 50 °C for 6 h, until the complete consumption of **Et-BDP**, which was monitored by TLC. The reaction mixture was quenched with 1.0 M HCl, and the aqueous phase was extracted with DCM (3 x 30 mL) and the combined organic layers were washed with brine and then dried over anhydrous Na2SO4, filtrated and concentrated under vacuum. The residue was then purified by flash column chromatography (PE/DCM = 100:1). The title compound **Et-DABDP** was obtained as a reddish orange solid (46 mg, 35% yield). Single crystals suitable for X-ray diffraction measurement were grown from a solution of **Et-DABDP** in *n*-pentane/diethyl ether.

1H NMR (600 MHz, CDCl3): δ 7.14 (t, *J* = 2.9 Hz, 2H), 6.96 (d, *J* = 2.9 Hz, 4H), 2.64 (s, 3H), 2.37-2.33 (m, 10H), 1.68 (s, 6H), 1.21 (s, 36H), 0.98 (t, *J* = 7.5 Hz, 6H).

13C NMR (100 MHz, CDCl3): δ 151.2, 148.3, 139.8, 133.2, 132.8, 132.2, 128.0, 127.7, 118.4, 34.8, 31.8, 18.2, 17.5, 15.4, 14.8, 14.5.

11B NMR (192 MHz, CDCl3): δ 0.14 (s, 1B).

HRMS (ESI) *m/z* calcd. for C46H68BN2 [M + H]+: 659.5476, found: 659.5463.

**2.1.3 Synthesis of Et-DABDP-Ph [****221159-19-9]**

According to similar procedure, (3,5-di-tert-butylphenyl) magnesium bromide was replaced by equimolar phenyl magnesium bromide, and the rest of the operation was unchanged. The title compound **Et-DABDP-Ph** was obtained as a reddish orange solid (33.87 mg, 39% yield). Single crystals suitable for X-ray diffraction measurement were grown from a solution of **Et-DABDP-Ph** in *n*-pentane/diethyl ether. Data are as follows and matching with the previous literature1,2.

1H NMR (400 MHz, CDCl3): δ 7.24-7.14 (m, 10H), 2.66 (s, 3H), 2.37 (s, 6H), 2.33 (q, *J* = 7.4 Hz, 4H), 1.70 (s, 6H), 0.96 (t, *J* = 7.5 Hz, 6H).

HRMS (ESI) *m/z* calcd. for C30H35BN2Na [M + Na]+: 457.2791, found: 457.2791.

**2.1.4 Synthesis of Et-DABDP-Naph [907589-97-3]**

According to similar procedure, (3,5-di-tert-butylphenyl) magnesium bromide was replaced by equimolar 2-naphthyl magnesium bromide, and the rest of the operation was unchanged. The title compound **Et-DABDP-Naph** was obtained as a reddish orange solid (43.81 mg, 41% yield). Data are as follows and matching with the previous literature2.

1H NMR (400 MHz, CDCl3): δ 7.79-7.77 (m, 2H), 7.72-7.69 (m, 6H), 7.45 (d, *J* = 8.2 Hz, 2H), 7.40-7.36 (m, 4H), 2.70 (s, 3H), 2.40 (s, 6H), 2.34 (q, *J* = 7.5 Hz, 4H), 1.72 (s, 6H), 0.97 (t, *J* = 7.4 Hz, 6H).

13C NMR (100 MHz, CDCl3): δ 151.5, 140.3, 133.9, 133.5, 132.9, 132.7, 132.6, 132.5, 132.2, 128.2, 127.5, 126.4, 125.0, 124.8, 18.1, 17.6, 15.2, 14.9, 14.8.

11B NMR (192 MHz, CDCl3): δ -0.19 (s, 1B).

HRMS (ESI) *m/z* calcd. for C38H39BN2Na [M + Na]+: 557.3104, found: 557.3083.

**2.2 Preparation of substrates**

**2.2.1 Synthesis of methyl 3-(allyloxy)-4-iodobenzoate [501892-70-2]**

To a dry RBF, SOCl2 (3.4 g, 28.4 mmol) was added slowly to a solution of **6a** (5.0 g, 18.9 mmol) in MeOH (50 mL) at 0 °C. The resulting mixture was stirred at 50 °C for 3 h. After completion of the reaction, the mixture was cooled to room temperature, and then concentrated to provide crude methyl 3-hydroxy-4-iodobenzoate (6.2 g) as a white solid, which was used directly in the next step.

Allyl bromide (1.7 g, 14.0 mol) was slowly added into a mixture of K2CO3 (4.5 g, 32.4 mol) and the solution of 3-hydroxy-4-iodobenzoate (3.0 g, obtained in the last step) in acetone (25 mL). And the resulting mixture was heated to 65 °C for 2 h. After cooling to room temperature, distilled water (30 mL) was added to quench the reaction. After remobing acetone, the residue was extracted with DCM (25 mL x 3). The combined organic layers were washed with brine, dried over anhydrous Na2SO4, filtered and concentrated by a rotary vacuum evaporator. The resulting residue was purified by chromatography using PE/EtOAc (10:1) as eluent. The title compound was obtained as a white solid (2.9 g, 84%).

1H NMR (600 MHz, CDCl3): δ 7.86 (d, *J* = 8.0 Hz, 1H), 7.43 (d, *J* = 1.7 Hz, 1H), 7.37 (dd, *J* = 8.1, 1.9 Hz, 1H), 6.10-6.04 (m, 1H), 5.55 (dq, *J* = 17.2, 1.7 Hz, 1H), 5.34 (dq, *J* = 10.6, 1.4 Hz, 1H), 4.66 (dt, *J* = 4.7, 1.6 Hz, 2H), 3.91 (s, 3H).

13C NMR (150 MHz, CDCl3): δ 166.7, 157.3, 139. 7, 132.2, 131.7, 123.6, 118.1, 112.7, 93.4, 70.0, 52.5.

HRMS (ESI) *m/z* calcd. for C11H11INaO3 [M + Na]+: 340.9645, found: 340.9645.

**2.2.2 Synthesis of (4aR,6S,7R,8R,8aS)-6-methoxy-2,2-dimethylhexahydropyrano- [3,2-d] [1,3]dioxine-7,8-diol 73b [15354-29-7]**

The titled compound was synthesized according to a reported procedure with slightly modification3. To a round bottom flask charged with α-methyl glucopyranoside **73a** (3.0 g, 15.4 mmol) and PTSA⋅H2O (0.3 g, 1.5 mmol) was added acetone (30 mL, 0.77 M). Dimethoxypropane (3 mL, 23.2 mmol) and DMF were added successively until the reaction became homogeneous (approximately 4 mL). A reflux condenser was fitted to the flask and the reaction mixture was refluxed for 13 hours. After cooling to ambient temperature, TEA was added. The resulting mixture was filtered through a celite pad and washed with acetone. The volatiles were concentrated on a rotary evaporation under reduced pressure. The residue was subjected to flash column chromatography (DCM/MeOH = 20:1) to give **73b** as a white solid (1.5 g, 40% yield). Data are as follows and matching with the previous literature3.

1H NMR (400 MHz, CDCl3): δ 4.75 (d, *J* = 2.6 Hz, 1H), 3.88-3.85 (m, 1H), 3.78-3.72 (m, 2H), 3.63-3.55 (m, 2H), 3.52 (t, *J* = 6.3 Hz, 1H), 3.42 (s, 3H), 2.85 (s, 1H), 2.38 (d, *J* = 6.3 Hz, 1H), 1.51 (s, 3H), 1.43 (s, 3H).

# 3. The photophysical and electrochemical properties of photocatalysts

**3.1 Normalized UV-Vis absorption and emission spectra in DCM for photocatalysts**


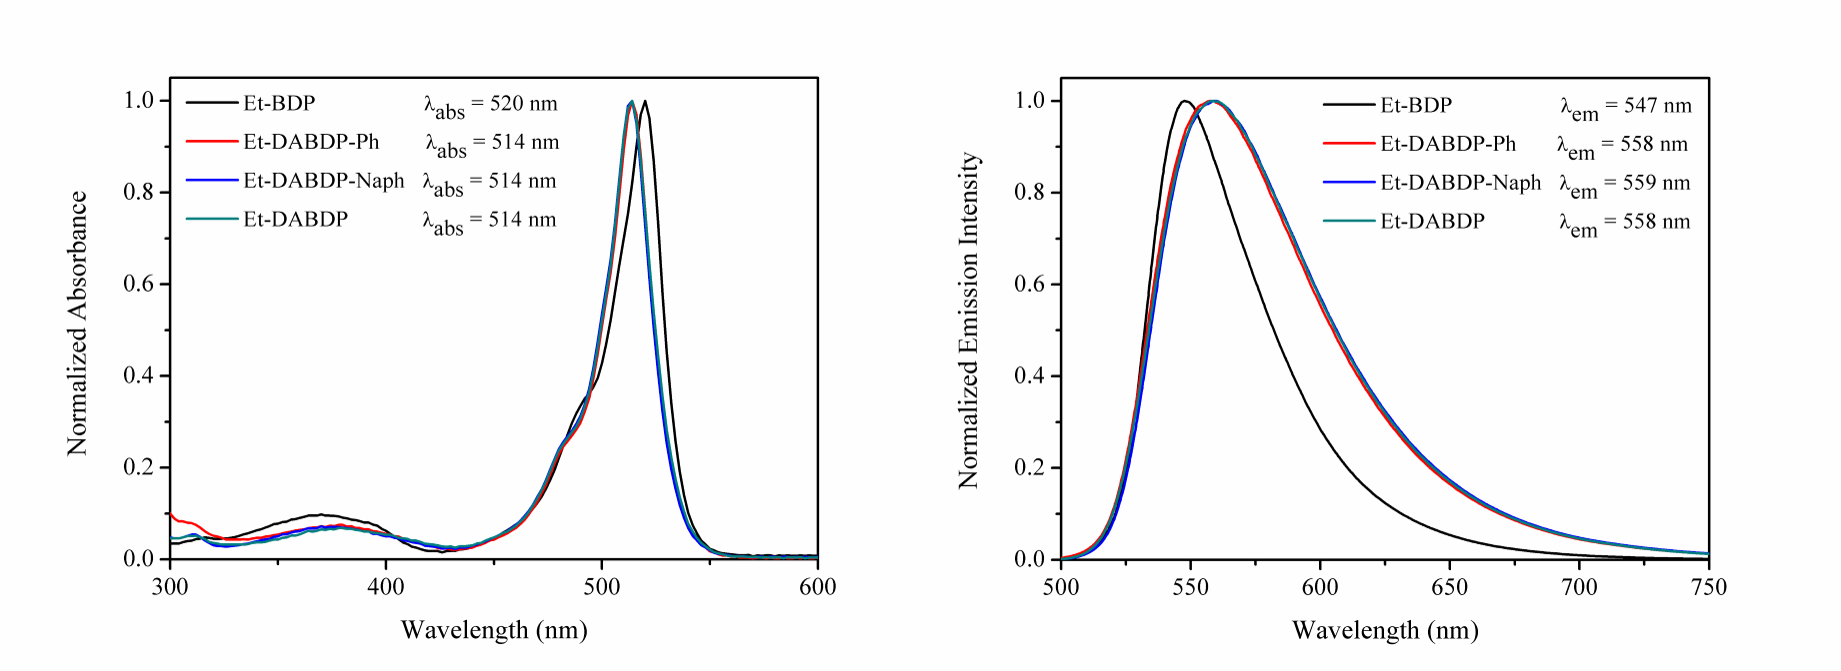


**Figure S2.** Normalized UV-Vis absorption (left) and emission (right) spectra in DCM (1 × 10-5 M)

for **Et-BDP, Et-DABDP-Ph, Et-DABDP-Naph** and **Et-DABDP**.

**3.2 Photophysical properties of photocatalysts**

**Table S1.** Photophysical properties of PC in DCM

| PC | λabs (nm)a | ε(104 M-1  cm-1)a | λem (nm)b | Stokes shift  (nm) | ΦF,sol [%]c | τflu (ns)d |
| --- | --- | --- | --- | --- | --- | --- |
| Et-BDP | 520 | 8.92 | 547 | 27 | 93 | 7.07 |
| Et-DABDP-Ph | 514 | 8.96 | 558 | 44 | 70 | 5.87 |
| Et-DABDP-Naph | 514 | 8.12 | 559 | 45 | 69 | 5.97 |
| Et-DABDP | 514 | 8.04 | 558 | 44 | 65 | 5.64 |

aLinear absorption band maximum and molar absorptivity in DCM solution. bEmission band maximum in DCM solution. cEmission quantum yield measured using the calibrated integrating sphere system. dTime-resolved emission data in DCM solution.

**3.3 Electrochemical properties of photocatalysts**

**Table S2.** Electrochemical properties of PC in DCM

| PC | *E*(PC+/PC)  (V)a | *E*(PC/PC-)  (V)a | *E*(PC+/PC*)  (V)b | *E*(PC*/PC-)  (V)b | Eem (eV)c |
| --- | --- | --- | --- | --- | --- |
| Et-BDP | 1.06 | -1.33 | -1.21 | 0.94 | 2.27 |
| Et-DABDP-Ph | 0.88 | -1.63 | -1.35 | 0.60 | 2.23 |
| Et-DABDP-Naph | 0.89 | -1.61 | -1.33 | 0.61 | 2.22 |
| Et-DABDP | 0.84 | -1.73 | -1.39 | 0.50 | 2.23 |

aAll redox potentials reported vs. SCE. Measurements were performed in deoxygenated DCM at room temperature.bExcited state oxidation and reduction potentials were calculated by the following approximate formulas1:

E(PC*/PC−) = E(PC/PC−) - E and E(PC+/PC*) = E(PC+/PC) + E.

cEem = 1242/λmax

PC+ + e → PC *E*(PC+/PC)

PC → PC* *E* = -Eem/e

PC+ e → PC- *E*(PC/PC-)

PC+ + e → PC* *E*(PC+/PC*) = *E*(PC+/PC) + *E*

PC* + e → PC- *E*(PC*/PC-) = *E*(PC/PC-) - *E*

**3.4 Photoredox characteristics for each photocatalyst**

**3.4.1 Photoredox characteristics for Et-BDP**

|  |  |
| --- | --- |
| E1/2(PC+/PC*) = -1.21 V, E1/2(PC*/PC-) = 0.94 V, E1/2(PC+/PC) = 1.06 V, E1/2(PC/PC-) = -1.33 V. All potentials are given *vs.* SCE. | |

**Figure S3.** Cyclic voltammogram of **Et-BDP** in DCM, using 0.1 M TBAPF6 as supporting electrolyte.





**Figure S4.** UV/Vis absorption and emission spectrum of **Et-BDP** in DCM (1×10-5 M).





**Figure S5.** Fluorescence decay curve of **Et-BDP** in DCM (1×10-5 M)

Life time τ in DCM: 7.07 ns, R2 = 0.9969.

**3.4.2 Photoredox characteristics for Et-DABDP-Ph**

|  |  |
| --- | --- |
| E1/2(PC+/PC*) = -1.35 V, E1/2(PC*/PC-) = 0.60 V, E1/2(PC+/PC) = 0.88 V, E1/2(PC/PC-) = -1.63 V. All potentials are given *vs.* SCE. | |

**Figure S6.** Cyclic voltammogram of **Et-DABDP-Ph** in DCM, using 0.1 M TBAPF6 as supporting electrolyte.





**Figure S7.** UV/Vis absorption and emission spectrum of **Et-DABDP-Ph** in DCM (1×10-5 M).





**Figure S8.** Fluorescence decay curve of **Et-DABDP-Ph** in DCM (1×10-5 M)

Life time τ in DCM: 5.87 ns, R2 = 0.9963.

**3.4.3 Photoredox characteristics for Et-DABDP-Naph**

|  |  |
| --- | --- |
| E1/2(PC+/PC*) = -1.33 V, E1/2(PC*/PC-) = 0.61 V, E1/2(PC+/PC) = 0.89 V, E1/2(PC/PC-) =  -1.61 V. All potentials are given *vs.* SCE. | |

**Figure S9.** Cyclic voltammogram of **Et-DABDP-Naph** in DCM, using 0.1 M TBAPF6 as supporting electrolyte.





**Figure S10.** UV/Vis absorption and emission spectrum of **Et-DABDP-Naph** in DCM (1×10-5 M).





**Figure S11.** Fluorescence decay curve of **Et-DABDP-Naph** in DCM (1×10-5 M)

Life time τ in DCM: 5.97 ns, R2 = 0.9967.

**3.4.4 Photoredox characteristics for Et-DABDP**

|  |  |
| --- | --- |
| E1/2(PC+/PC*) = -1.39 V, E1/2(PC*/PC-) = 0.50 V, E1/2(PC+/PC) = 0.84 V, E1/2(PC/PC-) = -1.73 V. All potentials are given *vs.* SCE. | |

**Figure S12.** Cyclic voltammogram of **Et-DABDP** in DCM, using 0.1 M TBAPF6 as supporting electrolyte.





**Figure S13.** UV/Vis absorption and emission spectrum of **Et-DABDP** in DCM (1×10-5 M).





**Figure S14.** Fluorescence decay curve of **Et-DABDP** in DCM (1×10-5 M)

Life time τ in DCM: 5.64 ns, R2 = 0.9965.

# 4. Optimization of reaction conditions

**4.1 General procedure for condition optimization:**

For example as entry 4 in table **S3**: In a nitrogen-filled glove box, an oven-dried 10 mL Schlenk tube equipped with a stir bar was charged with 4-bromobenzonitrile (18.2 mg, 0.1 mmol, 1.0 eq), benzyl alcohol (16.2 mg, 1.5 mmol, 1.5 eq), NiBr2 (1.74 mg, 0.008 mmol, 0.08 eq.), Na2CO3 (2.2 mg, 0.02 mmol, 0.20 eq), DCyMA (35.2 mg, 0.18 mmol, 1.8 eq), a DMF solution of **Et-DABDP** (20 μL, 0.0025 M/L, 5 × 10-5 mmol, 5 × 10-4 eq), *n*-dodecane (10 μL), 0.5 mL DMF. The catalytic reaction was conducted at 60 °C and irradiated with 2 w white LEDs (at approximately 1 cm away from the light source) for 24 hours. The reaction mixture was diluted with DCM (2 mL) at room temperature and for GC analysis. The GC yield of the C-O cross coupling product was calculated with *n*-dodecane as internal standard.

**Table S3. The Screening of PC**

| Entry | PC | yield(%)a |
| --- | --- | --- |
| 1 | Et-BDP | 73 |
| 2 | Et-DABDP-Ph | 88 |
| 3 | Et-DABDP-Naph | 90 |
| **4** | **Et-DABDP** | **95** |
| 5 | Nile Red | 29 |
| 6 | Eosin Y | 35 |
| 7 | TPP | 11 |
| 8 | Acridine Orange Base | 42 |
| 9 | Rhodamine B | 30 |
| 10 | Alizarin red S | 0 |
| 11 | Ir(dtbbpy)(ppy)2[PF6] | 42 |
| 12 | Ir[dF(CF3)ppy]2(dtbbpy)PF6 | 48 |
| 13 | Ru(bpy)3Cl2 | 44 |

Reaction conditions: **1** (1.0 eq., 0.1 mmol), **2** (1.5 eq., 0.15 mmol), NiBr2 (8.0 mol%), **PC** (0.05 mol%), DCyMA (1.8 eq., 0.18 mmol), Na2CO3 (0.2 eq., 0.02 mmol), DMF (0.5 mL), white LED (2 w), 60 °C, N2, 24 h. aGC yield.

**Table S4. The Screening of Base**

| Entry | Base | yield(%)a |
| --- | --- | --- |
| **1** | **DCyMA** | **95** |
| 2 | DMCyA | 55 |
| 3 | DECyA | 23 |
| 4 | DMIPA | 42 |
| 5 | DIPEA | 6 |
| 6 | DMAP | 5 |
| 7 | K2CO3 | 0 |
| 8 | Cs2CO3 | 28 |
| 9 | KOAc | 0 |
| 10 | HMTA | 0 |
| 11 | K3PO4 | 11 |
| 12 | DBU | 7 |
| 13 | DABCO | 8 |

Reaction conditions: **1** (1.0 eq., 0.1 mmol), **2** (1.5 eq., 0.15 mmol), NiBr2 (8.0 mol%), **Et-DABDP** (0.05 mol%), base (1.8 eq., 0.18 mmol), Na2CO3 (0.2 eq., 0.02 mmol), DMF (0.5 mL), white LED (2 w), 60 °C, N2, 24 h. aGC yield.

**Table S5. The Screening of metal sources**

| Entry | [M] | yield(%)a |
| --- | --- | --- |
| 1 | Ni(cod)2 | 92 |
| 2 | NiCl2 | 93 |
| **3** | **NiBr2** | **95** |
| 4 | Ni(OTf)2 | 90 |
| 5 | Ni(acac)2 | 89 |
| 6 | Nil2 | 77 |
| 7 | Pd(OAc)2 | 24 |
| 8 | PdCl2 | 28 |

Reaction conditions: **1** (1.0 eq., 0.1 mmol), **2** (1.5 eq., 0.15 mmol), **[M]** (8.0 mol%), **Et-DABDP** (0.05 mol%), DCyMA (1.8 eq., 0.18 mmol), Na2CO3 (0.2 eq., 0.02 mmol), DMF (0.5 mL), white LED (2 w), 60 °C, N2, 24 h. aGC yield.

**Table S6. The Screening of Solvents**

| Entry | Solvent | yield(%)a |
| --- | --- | --- |
| **1** | **DMF** | **95** |
| 2 | DMA | 49 |
| 3 | DEF | 68 |
| 4 | DCE | 21 |
| 5 | DMSO | 24 |
| 6 | Acetone | 24 |
| 7 | MeCN | 80 |
| 8 | DME | 1 |
| 9 | Tol | 0 |
| 10 | THF | 11 |

Reaction conditions: **1** (1.0 eq., 0.1 mmol), **2** (1.5 eq., 0.15 mmol), NiBr2 (8.0 mol%), **Et-DABDP** (0.05 mol%), DCyMA (1.8 eq., 0.18 mmol), Na2CO3 (0.2 eq., 0.02 mmol), solvent (0.5 mL), white LED (2 w), 60 °C, N2, 24 h. aGC yield.

**Table S7. The Screening of Light Source**

| Entry | Light source | yield(%)a |
| --- | --- | --- |
| 1 | Green (530 nm) | 93 |
| 2 | Purple (365 nm) | 82 |
| 3 | Blue (465 nm) | 94 |
| 4 | Yellow (590 nm) | 1 |
| **5** | **White (6000-6500 K)** | **95** |

Reaction conditions: **1** (1.0 eq., 0.1 mmol), **2** (1.5 eq., 0.15 mmol), NiBr2 (8.0 mol%), **Et-DABDP** (0.05 mol%), DCyMA (1.8 eq., 0.18 mmol), Na2CO3 (0.2 eq., 0.02 mmol), DMF (0.5 mL), LED (2 w), 60 °C, N2, 24 h. aGC yield.

**Table S8. The Screening of amount of benzyl alcohol**

| Entry | Equivalent of BnOH | yield(%)a |
| --- | --- | --- |
| 1 | 1.2 | 87 |
| **2** | **1.5** | **95** |
| 3 | 2.0 | 95 |

Reaction conditions: **1** (1.0 eq., 0.1 mmol), **2** (x eq., 0.15 mmol), NiBr2 (8.0 mol%), **Et-DABDP** (0.05 mol%), DCyMA (1.8 eq., 0.18 mmol), Na2CO3 (0.2 eq., 0.02 mmol), DMF (0.5 mL), white LED (2 w), 60 °C, N2, 24 h. aGC yield.

**Table S9. The Screening of amount of NiBr2**

| Entry | NiBr2/% | yield(%)a |
| --- | --- | --- |
| 1 | 2 | 56 |
| 2 | 4 | 88 |
| 3 | 6 | 91 |
| **4** | **8** | **95** |
| 5 | 10 | 94 |

Reaction conditions: **1** (1.0 eq., 0.1 mmol), **2** (1.5 eq., 0.15 mmol), NiBr2 (x mol%), **Et-DABDP** (0.05 mol%), DCyMA (1.8 eq., 0.18 mmol), Na2CO3 (0.2 eq., 0.02 mmol), DMF (0.5 mL), white LED (2 w), 60 °C, N2, 24 h. aGC yield.

**Table S10. The Screening of reaction temperature**

| Entry | Temperature (°C) | yield (%)a |
| --- | --- | --- |
| 1 | 40 | 87 |
| 2 | 50 | 92 |
| **3** | **60** | **95** |
| 4 | 80 | 96 |

Reaction conditions: **1** (1.0 eq., 0.1 mmol), **2** (1.5 eq., 0.15 mmol), NiBr2 (x mol%), **Et-DABDP** (0.05 mol%), DCyMA (1.8 eq., 0.18 mmol), Na2CO3 (0.2 eq., 0.02 mmol), DMF (0.5 mL), white LED (2 w), x °C, N2, 24 h. aGC yield.

**Table S11. The Screening of Ligands**

| Entry | Ligand | yield(%)a |
| --- | --- | --- |
| **1** | **no** | **95** |
| 2 | **L1** | 5 |
| 3 | **L2** | 11 |
| 4 | **L3** | 10 |
| 5 | **L4** | 12 |

Reaction condition: 1 (1.0 eq., 0.1 mmol), 2 (1.5 eq., 0.15 mmol), NiBr2 (8.0 mol%), Et-DABDP (0.05 mol%), DCyMA (1.8 eq., 0.18 mmol), Na2CO3 (0.2 eq., 0.02 mmol), Ligand (8 mol%), DMF (0.5 mL), white LED (2 w), 60 °C, N2, 24 h. aGC yield.

**Table S12. Control experiment**

| Entry | Deviation from the standard conditions | Yield(%)a |
| --- | --- | --- |
| **1** | **None** | **95** |
| 2 | without photocatalyst | 20 |
| 3 | without light | 0 |
| 4 | without nickel catalyst | 0 |
| 5 | without base | 0 |
| 6 | Air instead of N2 | 15 |

# 5. General procedure for arylation of alcohols

**5.1 General procedure for the synthesis of aryl ethers**

In a glove box, NiBr2 (8.7 mg, 0.04 mmol, 0.08 eq), Na2CO3 (10.6 mg, 0.1 mmol, 0.2 eq) and DMF (2.5 mL) were added to a 10 mL Schlenk tube with a stir bar. And then aryl electrophiles (0.5 mmol), alcohol (1.0 mmol, 1.5 eq), DCyMA (175.8 mg, 0.9 mmol, 1.8 eq) and a DMF solution of **Et-DABDP** (100 μL, 0.0025 M/L, 2.5 × 10-4 mmol, 5 × 10-4 eq) were added to the reaction mixture successively. The reaction was then heated to 60-80 °C and irradiated on white LEDs (2 w, at approximately 1 cm away from the light source). After the reaction was stirred at 60-80 °C for 24 h, the crude reaction mixture was diluted with DCM (15 mL) and brine (10 mL). The organic phase was separated and the aqueous layer was extracted twice with DCM (2 × 10 mL). The combined organic layers dried over Na2SO4, filtered and concentrated on a rotary evaporator. The residue was purified by silica gel chromatography using PE/EtOAc as eluent to afford the corresponding desired aryl ethers.

**5.2 General Procedure for monoarylation of diols and triols**

In a nitrogen-filled glove box, NiBr2 (8.7 mg, 0.04 mmol, 0.08 eq), and DMF (2.5 mL) were added to a 10mL Schlenk tube with a stir bar. And then aryl electrophiles (0.5 mmol), diol or triol (0.75 mmol, 2.0 eq), DCyMA (175.8 mg, 0.9 mmol, 1.8 eq) and a DMF solution of **Et-DABDP** (100 μL, 0.0025 M/L, 2.5 × 10-4 mmol, 5 × 10-4 eq) were added to the reaction mixture successively. The reaction was then heated to 40-60 °C and irradiated on white LEDs (2 w, at approximately 1 cm away from the light source) for 12-36 hours. After aryl electrophiles were fully consumed (monitored by GC and TLC), the crude reaction mixture was diluted with DCM (15 mL) and brine (10 mL). The organic phase was separated and the aqueous layer was extracted twice with DCM (2 × 10 mL). The combined organic layers dried over Na2SO4, filtered and concentrated on a rotary evaporator. The residue was purified by silica gel chromatography using PE/EtOAc as eluent to afford the corresponding mono-arylated aryl ethers.


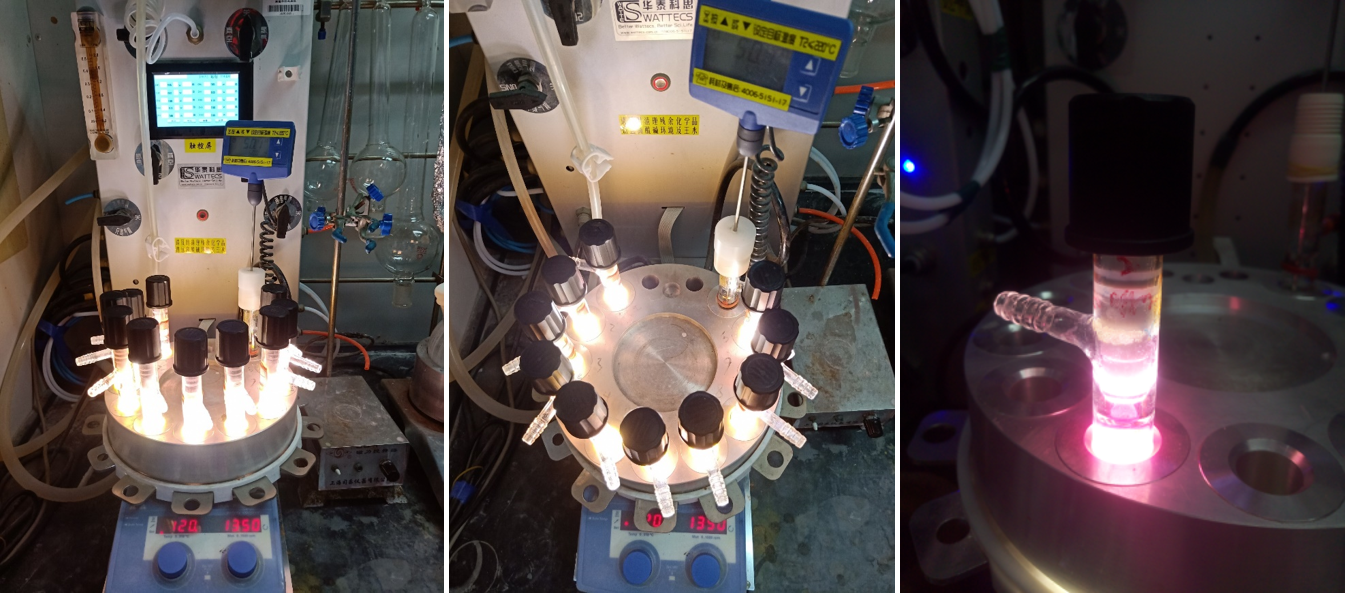


**Figure S15**. Pictures of reaction set-ups.

# 6. Substrate Scope

**4,4'-Dimethyl-1,1'-biphenyl 5 [613-33-2].** This compound was prepared according to the general procedure 5.1. The reaction was conducted at room temperature and irradiated with 2 w white LED (at approximately 1 cm away from the light source) for 10 hours. The resulting residue was purified by column chromatography using hexane as eluent. The title compound was obtained as a white solid (42 mg, 92% yield). Data are as follows and matching with the previous literature4.

1H NMR (600 MHz, CDCl3): δ 7.50-7.49 (m, 4H), 7.25-7.24 (m, 4H), 2.40 (s, 6H).

13C NMR (150 MHz, CDCl3): δ 138.4, 136.8, 129.6, 126.9, 21.2.

**(±)-*cis*-Methyl 3-(allyloxy)-4-(2-hydroxycyclohexyl)oxy)benzoate 8.** This compound was prepared according to the general procedure 5.2. The reaction was conducted at 80 ℃ and irradiated with 2 w white LED (at approximately 1 cm away from the light source) for 48 hours. The resulting residue was purified by column chromatography using PE/EtOAc (3:1) as eluent. The title compound was obtained as colorless oil (73 mg, 48% yield).

1H NMR (600 MHz, CDCl3): δ 7.64-7.62 (m, 1H), 7.57-7.56 (m, 1H), 7.00 (d, J = 8.4 Hz, 1H), 6.10-6.04 (m, 1H), 5.46-5.43 (m, 1H), 5.31 (d, *J* = 10.5 Hz, 1H), 4.60 (d, *J* = 4.9 Hz, 2H), 4.31-4.29 (m, 1H), 3.88 (s, 3H), 3.84 (s, 1H), 2.85 (d, *J* = 4.7 Hz, 1H), 2.04-2.00 (m, 1H), 1.91-1.89 (m, 1H), 1.70-1.69 (m, 3H), 1.61-1.59 (m, 1H), 1.37-1.34 (m, 2H).

13C NMR (150 MHz, CDCl3): δ 166.7, 151.8, 149.8, 132.7, 124.5, 123.8, 118.3, 117.9, 115.0, 81.5, 69.9, 68.9, 52.2, 30.4, 27.3, 22.2, 21.3.

HRMS (ESI) *m/z* calcd. for C17H22NaO5 [M + Na]+: 329.1359, found: 329.1357.

**(±)-*cis*-Methyl 3-hydroxy-4-((2-hydroxycyclohexyl)oxy)benzoate 9.** This compound was prepared according to the general procedure 5.2. The reaction was conducted at 80 ℃ and irradiated with 2 w white LED (at approximately 1 cm away from the light source) for 48 hours. The resulting residue was purified by column chromatography using PE/EtOAc (3:1) as eluent. The title compound was obtained as colorless oil (20 mg, 15% yield).

1H NMR (600 MHz, CDCl3): δ 7.57 (s, 1H), 7.50 (d, J = 8.4 Hz, 1H), 6.87-6.85 (m, 1H), 4.30 (d, J = 7.6 Hz, 1H), 4.03 (d, J = 6.3 Hz, 1H), 3.86 (s, 3H), 1.98-1.93 (m, 2H), 1.67 (m, 4H), 1.38 (m, 2H).

13C NMR (150 MHz, CDCl3): δ 167.2, 149.4, 147.3, 124.1, 122.4, 117.3, 115.0, 79.7, 69.7, 52.1, 30.5, 26.6, 21.8, 21.3.

HRMS (ESI) *m/z* calcd. for C14H18NaO5 [M + Na]+: 289.1046, found: 289.1049.

**4-Benzyloxybenzonitrile 14 [52805-36-4].** This compound was prepared according to the general procedure 5.1. The reaction was conducted at 60 °C and irradiated with 2 w white LED (at approximately 1 cm away from the light source) for 24 hours. The resulting residue was purified by column chromatography using PE/EtOAc (10:1) as eluent. The title compound was obtained as a white solid (99 mg, 95% yield). Data are as follows and matching with the previous literature5.

m.p. 93-94 °C.

1H NMR (400 MHz, CDCl3): δ 7.61-7.57 (m, 2H), 7.41-7.40 (m, 4H), 7.39-7.34 (m, 1H), 7.04-7.00 (m, 2H), 5.12 (s, 2H).

13C NMR (100 MHz, CDCl3): δ 162.1, 135.8, 134.1, 128.9, 128.5, 127.6, 119.3, 115.7, 104.4, 70.4.

**4-((4-Chlorobenzyl)oxy)benzonitrile 15 [79185-31-2].** This compound was prepared according to the general procedure 5.1. The reaction was conducted at 60 °C and irradiated with 2 w white LED (at approximately 1 cm away from the light source) for 24 hours. The resulting residue was purified by column chromatography using PE/EtOAc (10:1) as eluent. The title compound was obtained as a white solid (119 mg, 98% yield). Data are as follows and matching with the previous literature6.

m.p. 89-90 °C.

1H NMR (400 MHz, CDCl3): δ 7.59 (d, *J* = 8.9 Hz, 2H), 7.39-7.33 (m, 4H), 7.00 (d, *J* = 8.9, 2H), 5.08 (s, 2H).

13C NMR (100 MHz, CDCl3): δ 161.8, 134.4, 134.3, 134.2, 129.1, 128.9, 119.2, 115.7, 104.6, 69.6.

HRMS (ESI) *m/z* calcd. for C14H10ClNNaO [M + Na]+: 266.0343, found: 266.0351.

**4-((4-Trifluoromethyl)benzyloxy)benzonitrile 16 [262296-84-4].** This compound was prepared according to the general procedure 5.1. The reaction was conducted at 60 ℃ and irradiated with 2 w white LED (at approximately 1 cm away from the light source) for 24 hours. The resulting residue was purified by column chromatography using PE/EtOAc (10:1) as eluent. The title compound was obtained as a white solid (131 mg, 95% yield). Data are as follows and matching with the previous literature7.

m.p. 69-70 ℃.

1H NMR (400 MHz, CDCl3): δ 7.67 (d, *J* = 8.2 Hz, 2H), 7.63-7.59 (m, 2H), 7.54 (d, *J* = 8.1 Hz, 2H), 7.04-7.00 (m, 2H), 5.18 (s, 2H).

13C NMR (100 MHz, CDCl3): δ 161.6, 139.9, 134.2, 130.6 (q, *J* = 32.2 Hz), 127.5, 125.8 (q, *J* = 3.1 Hz), 124.1 (q, *J* = 272.4 Hz), 119.1, 115.6, 104.7, 69.4.

19F NMR (376 MHz, CDCl3): δ -62.55 (s, 3F).

HRMS (ESI) *m/z* calcd. for C15H10F3NNaO [M + Na]+: 300.0607, found: 300.0619.

**4-(4-Methoxybenzyloxy)benzonitrile 17 [31574-12-6].** This compound was prepared according to the general procedure 5.1. The reaction was conducted at 60 °C and irradiated with 2 w white LED (at approximately 1 cm away from the light source) for 24 hours. The resulting residue was purified by column chromatography using PE/EtOAc (10:1) as eluent. The title compound was obtained as a white solid (110 mg, 92% yield). Data are as follows and matching with the previous literature8.

m.p. 116-117 °C.

1H NMR (400 MHz, CDCl3): δ 7.60-7.57 (m, 2H), 7.36-7.32 (m, 2H), 7.03-6.99 (m, 2H), 6.95-6.91 (m, 2H), 5.04 (s, 2H), 3.82 (s, 3H).

13C NMR (100 MHz, CDCl3): δ 162.1, 159.9, 134.1, 129.4, 127.8, 119.3, 115.7, 114.3, 104.2, 70.2, 55.4.

HRMS (ESI) *m/z* calcd. for C15H13NNaO2 [M + Na]+: 262.0838, found: 262.0837.

**4-Methoxybenzonitrile 18 [874-90-8].** This compound was prepared according to the general procedure 5.1. The reaction was conducted at 60 °C and irradiated with 2 w white LED (at approximately 1 cm away from the light source) for 24 hours. The resulting residue was purified by column chromatography using PE/EtOAc (10:1) as eluent. The title compound was obtained as a white solid (61 mg, 92% yield). Data are as follows and matching with the previous literature9.

m.p. 57-58 °C.

1H NMR (400 MHz, CDCl3): δ 7.61-7.57 (m, 2H), 6.97-6.93 (m, 2H), 3.86 (s, 3H).

13C NMR (100 MHz, CDCl3): δ 163.0, 134.1, 119.3, 114.9, 104.1, 55.7.

**4-(Methoxy-d3)benzonitrile 19 [1404321-27-2].** This compound was prepared according to the general procedure 5.1. The reaction was conducted at 60 °C and irradiated with 2 w white LED (at approximately 1 cm away from the light source) for 24 hours. The resulting residue was purified by column chromatography using PE/EtOAc (10:1) as eluent. The title compound was obtained as a white solid (65 mg, 96% yield). Data are as follows and matching with the previous literature10.

m.p. 57-58 °C.

1H NMR (400 MHz, CDCl3): δ 7.61-7.57 (m, 2H), 6.97-6.93 (m, 2H).

13C NMR (100 MHz, CDCl3): δ 163.0, 134.1, 119.4, 114.9, 104.1.

HRMS (ESI) *m/z* calcd. for C8H4D3NNaO [M + Na]+: 159.0608, found: 159.0613.

**4-(2,2,2-Trifluoroethoxy)benzonitrile 20 [56935-76-3].** This compound was prepared according to the general procedure 5.1. The reaction was conducted at 60 °C and irradiated with 2 w white LED (at approximately 1 cm away from the light source) for 24 hours. The resulting residue was purified by column chromatography using PE/EtOAc (10:1) as eluent. The title compound was obtained as a white solid (88 mg, 88% yield). Data are as follows and matching with the previous literature11.

m.p. 52-53 °C.

1H NMR (400 MHz, CDCl3): δ 7.66-7.63 (m, 2H), 7.04-7.00 (m, 2H), 4.41 (q, *J* = 7.9 Hz, 2H).

13C NMR (100 MHz, CDCl3): δ 160.4, 134.3, 123.0 (q, *J* = 276.4 Hz), 118.6, 115.6, 106.3, 65.7 (q, *J* = 7.9 Hz).

19F NMR (376 MHz, CDCl3): δ -73.72- -73.76 (m, 3F).

**4-(2-Fluoroethoxy)benzonitrile 21 [132838-32-5].** This compound was prepared according to the general procedure 5.1. The reaction was conducted at 60 °C and irradiated with 2 w white LED (at approximately 1 cm away from the light source) for 24 hours. The resulting residue was purified by column chromatography using PE/EtOAc (10:1) as eluent. The title compound was obtained as a white solid (64 mg, 78% yield). Data are as follows and matching with the previous literature12.

m.p. 71-72 °C.

1H NMR (400 MHz, CDCl3): δ 7.62-7.58 (m, 2H), 7.00-6.97 (m, 2H), 4.85-4.71 (m, 2H), 4.31-4.22 (m, 2H).

13C NMR (100 MHz, CDCl3): δ 161.8, 134.2, 119.1, 115.4, 104.9, 81.6 (d, *J* = 170.8 Hz), 67.5 (d, *J* = 20.4 Hz).

19F NMR (376 MHz, CDCl3): δ -223.56- -223.96 (m, 1F).

HRMS (ESI) *m/z* calcd. for C9H8FNNaO [M + Na]+: 188.0488, found: 188.0475.

**4-Butoxybenzonitrile 22 [5203-14-5].** This compound was prepared according to the general procedure 5.1. The reaction was conducted at 60 °C and irradiated with 2 w white LED (at approximately 1 cm away from the light source) for 24 hours. The resulting residue was purified by column chromatography using PE/EtOAc (10:1) as eluent. The title compound was obtained as colorless oil (66 mg, 75% yield). Data are as follows and matching with the previous literature13.

1H NMR (400 MHz, CDCl3): δ 7.58-7.55 (m, 2H), 6.93 (d, *J* = 8.8 Hz, 2H), 4.00 (t, *J* = 6.5 Hz, 2H), 1.82-1.75 (m, 2H), 1.54-1.44 (m, 2H), 0.98 (t, *J* = 7.4 Hz, 3H).

13C NMR (100 MHz, CDCl3): δ 162.6, 134.1, 119.5, 115.3, 103.8, 68.2, 31.1, 19.3, 13.9.

**4-(Cyclopropylmethoxy)benzonitrile 23 [1019619-83-0].** This compound was prepared according to the general procedure 5.1. The reaction was conducted at 60 °C and irradiated with 2 w white LED (at approximately 1 cm away from the light source) for 24 hours. The resulting residue was purified by column chromatography using PE/EtOAc (10:1) as eluent. The title compound was obtained as a white solid (78 mg, 90% yield).

m.p. 62-63 °C.

1H NMR (400 MHz, CDCl3): δ 7.59-7.55 (m, 2H), 6.95-6.92 (m, 2H), 3.85 (d, *J* = 7.0 Hz, 2H), 1.31-1.24 (m, 1H), 0.70-0.65 (m, 2H), 0.39-0.35 (m, 2H).

13C NMR (100 MHz, CDCl3): δ 162.4, 134.0, 119.3, 115.3, 103.8, 73.2, 10.1, 3.4.

HRMS (ESI) *m/z* calcd. for C11H11NNaO [M + Na]+: 196.0733, found: 196.0733.

**(*E*)-4-(But-2-en-1-yloxy)benzonitrile 24 [61493-65-0].** This compound was prepared according to the general procedure 5.1. The reaction was conducted at 60 °C and irradiated with 2 w white LED (at approximately 1 cm away from the light source) for 24 hours. The resulting residue was purified by column chromatography using PE/EtOAc (10:1) as eluent. The title compound was obtained as a white solid (79 mg, 91% yield).

m.p. 64-65 °C.

1H NMR (400 MHz, CDCl3): δ 7.57 (d, *J* = 8.9 Hz, 2H), 6.94 (d, *J* = 8.9 Hz, 2H), 5.93-5.84 (m, 1H), 5.74-5.66 (m, 1H), 4.51 (d, *J* = 6.0 Hz, 2H), 1.77 (dd, *J* = 6.4, 1.0 Hz, 3H).

13C NMR (100 MHz, CDCl3): δ 162.1, 134.1, 131.7, 125.1, 119.4, 115.6, 104.0, 69.1, 18.0.

HRMS (ESI) *m/z* calcd. for C11H11NNaO [M + Na]+: 196.0733, found: 196.0734.

**4-(2-Methoxyethoxy)benzonitrile 25 [80407-66-5].** This compound was prepared according to the general procedure 5.1. The reaction was conducted at 60 °C and irradiated with 2 w white LED (at approximately 1 cm away from the light source) for 24 hours. The resulting residue was purified by column chromatography using PE/EtOAc (10:1) as eluent. The title compound was obtained as a white solid (81 mg, 92% yield). Data are as follows and matching with the previous literature14.

m.p. 43-44 °C.

1H NMR (600 MHz, CDCl3): δ 7.57 (d, *J* = 8.6 Hz, 2H), 6.97 (d, *J* = 8.7 Hz, 2H), 4.15 (t, *J* = 4.4 Hz, 2H), 3.76 (t, *J* = 4.6 Hz, 2H), 3.44 (s, 3H).

13C NMR (150 MHz, CDCl3): δ 162.2, 134.1, 119.3, 115.4, 104.3, 70.8, 67.8, 59.4.

HRMS (ESI) *m/z* calcd. for C10H11NNaO2 [M + Na]+: 200.0682, found: 200.0682.

**4-(2-(2-Methoxyethoxy)ethoxy)benzonitrile 26 [1095251-42-5].** This compound was prepared according to the general procedure 5.1. The reaction was conducted at 60 °C and irradiated with 2 w white LED (at approximately 1 cm away from the light source) for 24 hours. The resulting residue was purified by column chromatography using PE/EtOAc (10:1) as eluent. The title compound was obtained as a white solid (105 mg, 95% yield).

m.p. 66-67 °C.

1H NMR (400 MHz, CDCl3): δ 7.59-7.56 (m, 2H), 6.98-6.95 (m, 2H), 4.18 (t, *J* = 4.6 Hz, 2H), 3.88 (t, *J* = 4.8 Hz, 2H), 3.73-3.70 (m, 2H), 3.59-3.56 (m, 2H), 3.39 (s, 3H).

13C NMR (100 MHz, CDCl3): δ 162.2, 134.0, 119.3, 115.4, 104.2, 72.0, 71.0, 69.5, 67.9, 59.2.

HRMS (ESI) *m/z* calcd. for C11H11NNaO [M + Na]+: 244.0944, found: 244.0948.

**Methyl 2-(4-cyanophenoxy)acetate 27.** This compound was prepared according to the general procedure 5.1. The reaction was conducted at 60 °C and irradiated with 2 w white LED (at approximately 1 cm away from the light source) for 24 hours. The resulting residue was purified by column chromatography using PE/EtOAc (10:1) as eluent. The title compound was obtained as a white solid (81 mg, 85% yield).

m.p. 64-65 °C.

1H NMR (400 MHz, CDCl3): δ 7.61 (d, *J* = 8.8 Hz, 2H), 6.96 (d, *J* = 8.8 Hz, 2H), 4.69 (s, 2H), 3.82 (s, 3H).

13C NMR (100 MHz, CDCl3): δ 168.4, 161.0, 134.2, 118.9, 115.5, 105.4, 65.2, 52.6.

HRMS (ESI) *m/z* calcd. for C10H9NNaO3 [M + Na]+: 214.0475, found: 214.0480.

**4-((2,2-Dimethyl-1,3-dioxolan-4-yl)methoxy)benzonitrile 28.** This compound was prepared according to the general procedure 5.1. The reaction was conducted at 60 °C and irradiated with 2 w white LED (at approximately 1 cm away from the light source) for 24 hours. The resulting residue was purified by column chromatography using PE/EtOAc (10:1) as eluent. The title compound was obtained as colorless oil (91 mg, 78% yield).

1H NMR (600 MHz, CDCl3): δ 7.57 (d, *J* = 8.8 Hz, 2H), 6.96 (d, *J* = 8.9 Hz, 2H), 4.50-4.45 (m, 1H), 4.16 (dd, *J* = 8.5, 6.5 Hz, 1H), 4.09-3.97 (m, 2H), 3.89 (dd, *J* = 8.6, 5.7 Hz, 1H), 1.44 (s, 3H), 1.39 (s, 3H).

13C NMR (150 MHz, CDCl3): δ 161.9, 134.1, 119.1, 115.4, 110.1, 104.6, 73.8, 69.1, 66.6, 26.8, 25.4.

HRMS (ESI) *m/z* calcd. for C13H15NNaO3 [M + Na]+: 256.0944, found: 256.0949.

**4-Cyclohexyloxybenzonitrile 29 [270260-65-6].** This compound was prepared according to the general procedure 5.1. The reaction was conducted at 60 °C and irradiated with 2 w white LED (at approximately 1 cm away from the light source) for 24 hours. The resulting residue was purified by column chromatography using PE/EtOAc (10:1) as eluent. The title compound was obtained as colorless oil (64 mg, 64% yield). Data are as follows and matching with the previous literature15.

1H NMR (400 MHz, CDCl3): δ 7.55 (d, *J* = 8.8 Hz, 2H), 6.92 (d, *J* = 8.8 Hz, 2H), 4.34-4.30 (m, 1H), 1.99-1.94 (m, 2H), 1.82-1.78 (m, 2H), 1.59-1.52 (m, 3H), 1.40-1.35 (m, 3H).

13C NMR (150 MHz, CDCl3): δ 161.4, 134.1, 119.5, 116.3, 103.4, 75.8, 31.6, 25.5, 23.7.

HRMS (ESI) *m/z* calcd. for C13H15NNaO [M + Na]+: 224.1046, found: 224.1052.

**(±)-4-((1-Methoxypropan-2-yl)oxy)benzonitrile 30 [1344062-36-7].** This compound was prepared according to the general procedure 5.1. The reaction was conducted at 60 °C and irradiated with 2 w white LED (at approximately 1 cm away from the light source) for 24 hours. The resulting residue was purified by column chromatography using PE/EtOAc (6:1) as eluent. The title compound was obtained as colorless oil (80 mg, 84% yield).

1H NMR (400 MHz, CDCl3): δ 7.58-7.55 (m, 2H), 6.99-6.95 (m, 2H), 4.64-4.60 (m, 1H), 3.60-3.49 (m, 2H), 3.40 (s, 3H), 1.33 (d, *J* = 6.3 Hz, 3H).

13C NMR (150 MHz, CDCl3): δ 161.5, 134.0, 119.3, 116.3, 103.8, 75.6, 73.5, 59.4, 16.6.

HRMS (ESI) *m/z* calcd. for C11H13NNaO2 [M + Na]+: 214.0838, found: 214.0838.

**(±)-4-((3-Oxobutan-2-yl)oxy)benzonitrile 31 [306979-60-2].** This compound was prepared according to the general procedure 5.1. The reaction was conducted at 60 °C and irradiated with 2 w white LED (at approximately 1 cm away from the light source) for 24 hours. The resulting residue was purified by column chromatography using PE/EtOAc (10:1) as eluent. The title compound was obtained as a white solid (78 mg, 83% yield).

m.p. 72-73 °C.

1H NMR (400 MHz, CDCl3): δ 7.61-7.57 (m, 2H), 6.91-6.88 (m, 2H), 4.68 (q, *J* = 20.6 Hz, 1H), 2.17 (s, 3H), 1.54 (d, *J* = 6.8 Hz, 3H).

13C NMR (150 MHz, CDCl3): δ 208.1, 160.6, 134.2, 118.8, 115.6, 104.9, 79.3, 24.8, 17.3.

HRMS (ESI) *m/z* calcd. for C11H11NNaO2 [M + Na]+: 212.0682, found: 212.0682.

**Methyl (*2R*)-2-(4-cyanophenoxy)propanoate 32 [165334-00-9].** This compound was prepared according to the general procedure 5.1. The reaction was conducted at 60 °C and irradiated with 2 w white LED (at approximately 1 cm away from the light source) for 24 hours. The resulting residue was purified by column chromatography using PE/EtOAc (10:1) as eluent. The title compound was obtained as colorless oil (89 mg, 87% yield). The spectra is as follows and matching with the previous literature16.

98% ee, HPLC conditions: Lux 5u Cellulose column, n-hexane/isopropanol 99:1 (v/v); flow rate = 1 mL/min; UV detection at 254 nm; tR = 14.1 min (minor), tR = 14.7 min (major).


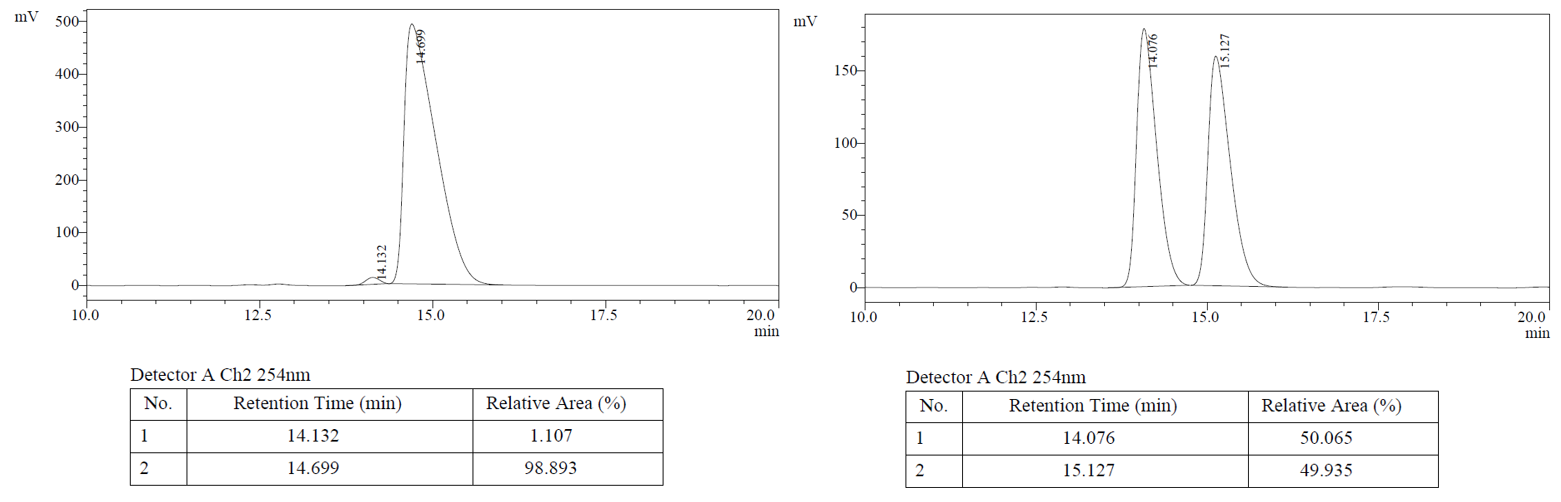


[α]20D = - 47.2° (c = 0.94, CHCl3).

1H NMR (300 MHz, CDCl3): δ 7.56 (d, *J* = 8.8 Hz, 2H), 6.89 (d, *J* = 8.8 Hz, 2H), 4.81 (q, *J* = 6.8 Hz, 1H), 3.75 (s, 3H), 1.63 (d, *J* = 6.8 Hz, 3H);

13C NMR (100 MHz, CDCl3): δ 171.6, 160.8, 134.1, 119.0, 115.7, 105.0, 72.6, 52.6, 18.4.

HRMS (ESI) *m/z* calcd. for C11H11NNaO3 [M + Na]+: 228.0631, found: 228.0631.

***tert*-Butyl (*3S*)-(1-(4-cyanophenoxy)-3-phenylpropan-2-yl)carbamate 33.** This compound was prepared according to the general procedure 5.1. The reaction was conducted at 60 °C and irradiated with 2 w white LED (at approximately 1 cm away from the light source) for 24 hours. The resulting residue was purified by column chromatography using PE/EtOAc (10:1) as eluent. The title compound was obtained as a white solid (149 mg, 85% yield).

[α]20D = + 10.0° (c = 0.54, CHCl3).

m.p. 104-105 °C.

1H NMR (400 MHz, CDCl3): δ 7.59 (d, *J* = 8.8 Hz, 2H), 7.29-7.18 (m, 5H), 6.94 (d, *J* = 8.8 Hz, 2H), 4.86 (d, *J* = 8.2 Hz, 1H), 4.20 (s, 1H), 3.95-3.91 (m, 2H), 3.00-2.95 (m, 2H), 1.43 (s, 9H).

13C NMR (100 MHz, CDCl3): δ 161.9, 155.3, 137.4, 134.2, 129.4, 128.8, 126.9, 119.2, 115.4, 104.6, 80.0, 68.4, 51.0, 37.7, 28.5.

HRMS (ESI) *m/z* calcd. for C21H24N2NaO3 [M + Na]+: 375.1679, found: 375.1684.

**(*S*)-4-(1-Phenylethoxy)benzonitrile 34.** This compound was prepared according to the general procedure 5.1. The reaction was conducted at 60 °C and irradiated with 2 w white LED (at approximately 1 cm away from the light source) for 24 hours. The resulting residue was purified by column chromatography using PE/EtOAc (10:1) as eluent. The title compound was obtained as a white solid (78 mg, 70% yield).

99% ee, HPLC conditions: Lux 5u Cellulose column, n-hexane/isopropanol 90:10 (v/v); flow rate = 1 mL/min; UV detection at 254 nm; tR = 11.1 min (minor), tR = 11.9 min (major).


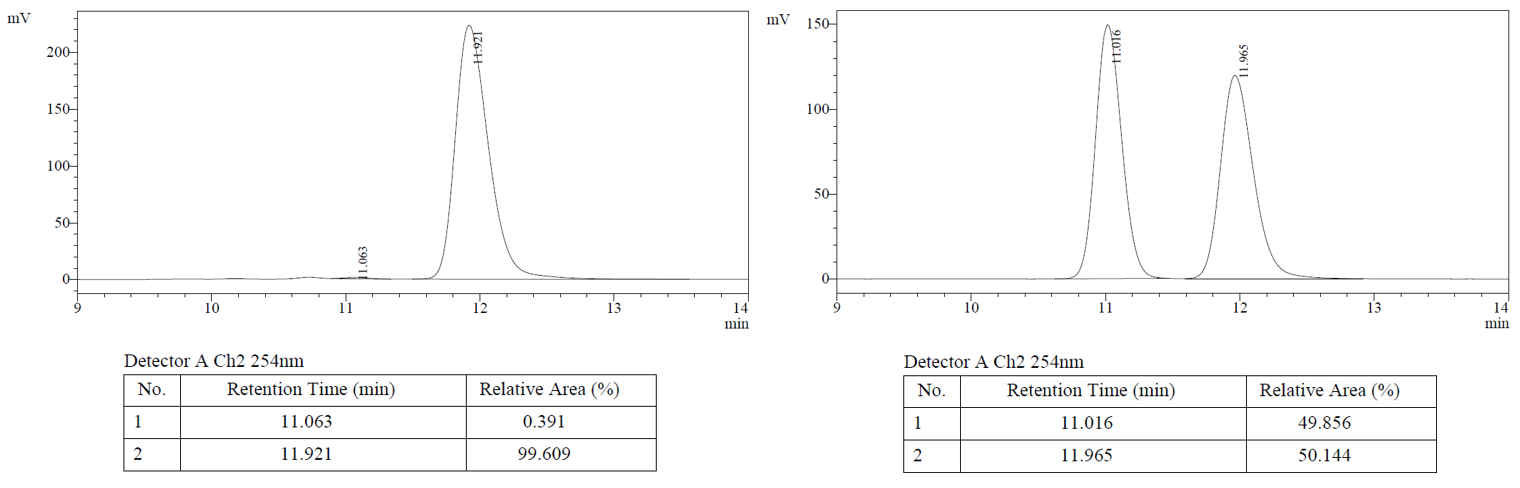


[α]20D = - 22.1° (c = 0.77, CHCl3).

m.p. 67-68 °C.

1H NMR (400 MHz, CDCl3): δ 7.48 (d, *J* = 8.8 Hz, 2H), 7.37-7.27 (m, 5H), 6.89 (d, *J* = 8.8 Hz, 2H), 5.35 (q, *J* = 6.4 Hz, 1H), 1.66 (d, *J* = 6.4 Hz, 3H).

13C NMR (100 MHz, CDCl3): δ 161.4, 142.0, 134.0, 129.0, 128.1, 125.5, 119.3, 116.6, 104.0, 76.7, 24.5.

HRMS (ESI) *m/z* calcd. for C15H13NNaO [M + Na]+: 246.0889, found: 246.0899.

**(±)-*cis*-4-((4-Hydroxytetrahydrofuran-3-yl)oxy)benzonitrile 35.** This compound was prepared according to the general procedure 5.2. The reaction was conducted at 60 °C and irradiated with 2 w white LED (at approximately 1 cm away from the light source) for 24 hours. The resulting residue was purified by column chromatography using PE/EtOAc (3:1) as eluent. The title compound was obtained as a white solid (93 mg, 91% yield).

m.p. 123-124 °C.

1H NMR (400 MHz, CDCl3): δ 7.62 (d, *J* = 8.8 Hz, 2H), 7.00 (d, *J* = 8.8 Hz, 2H), 4.83-4.79 (m, 1H), 4.55-4.52 (m, 1H), 4.16 (dd, *J* = 10.2, 5.6 Hz, 1H), 4.07 (dd, *J* = 9.5, 5.6 Hz, 1H), 3.93 (dd, *J* = 10.2, 4.1 Hz, 1H), 3.82 (dd, *J* = 9.5, 5.3 Hz, 1H), 2.37 (d, *J* = 7.4 Hz, 1H).

13C NMR (100 MHz, CDCl3): δ 160.5, 134.4, 118.8, 116.2, 105.6, 77.3, 72.9, 71.3, 70.6.

HRMS (ESI) *m/z* calcd. for C11H11NNaO3 [M + Na]+: 228.0631, found: 228.0625.

**(±)-*trans*-4-((2-Hydroxycyclohexyl)oxy)benzonitrile 36.** This compound was prepared according to the general procedure 5.2. The reaction was conducted at 60 °C and irradiated with 2 w white LED (at approximately 1 cm away from the light source) for 24 hours. The resulting residue was purified by column chromatography using PE/EtOAc (3:1) as eluent. The title compound was obtained as a white solid (101 mg, 93% yield).

m.p. 96-97 °C.

1H NMR (400 MHz, CDCl3): δ 7.57 (d, *J* = 8.8 Hz, 2H), 6.99 (d, *J* = 8.8 Hz, 2H), 4.13-4.07 (m, 1H), 3.78-3.72 (m, 1H), 2.37 (d, *J* = 2.3 Hz, 1H), 2.13-2.09 (m, 2H), 1.79-1.77 (m, 2H), 1.44-1.32 (m, 4H).

13C NMR (150 MHz, CDCl3): δ 161.6, 134.2, 119.3, 116.5, 104.3, 82.3, 73.2, 32.4, 29.1, 24.0, 23.9.

HRMS (ESI) *m/z* calcd. for C11H15NNaO2 [M + Na]+: 240.0995, found: 240.0992.

**(±)-*cis*-4-((2-Hydroxycyclooctyl)oxy)benzonitrile 37.** This compound was prepared according to the general procedure 5.2. The reaction was conducted at 40 °C and irradiated with 2 w white LED (at approximately 1 cm away from the light source) for 12 hours. The resulting residue was purified by column chromatography using PE/EtOAc (3:1) as eluent. The title compound was obtained as a colorless oil (113 mg, 92% yield).

1H NMR (400 MHz, CDCl3): δ 7.61-7.57 (m, 2H), 6.95-6.91 (m, 2H), 4.53 (dt, *J* = 9.0, 2.1 Hz, 1H), 4.09 (dt, 8.8, 2.7 Hz, 1H), 2.31 (s, 1H), 2.23-2.13 (m, 1H), 1.99-1.89 (m, 1H), 1.86-1.74 (m, 3H) ,1.73-1.43 (m, 7H).

13C NMR (100 MHz, CDCl3): δ 160.9, 134.2, 119.2, 116.4, 104.1, 80.4, 71.7, 29.6, 27.0, 26.1, 25.2, 25.2, 21.7.

HRMS (ESI) *m/z* calcd. for C15H19NNaO2 [M + Na]+: 268.1308, found: 268.1301.

**(±)-4-((3-Hydroxybutan-2-yl)oxy)benzonitrile 38 [1527764-97-1].** This compound was prepared according to the general procedure 5.2. The reaction was conducted at 60 °C and irradiated with 2 w white LED (at approximately 1 cm away from the light source) for 24 hours. The resulting residue was purified by column chromatography using PE/EtOAc (3:1) as eluent. The title compound was obtained as colorless oil (86 mg, 90% yield).

1H NMR (400 MHz, CDCl3): δ 7.60-7.57 (m, 2H), 6.98-6.94 (m, 2H), 4.44-4.38 (m, 0.5H), 4.28-4.21 (m, 0.5H), 4.07-4.00 (m, 0.5H), 3.92-3.86 (m, 0.5H), 2.34 (d, *J* = 3.7 Hz, 0.5H), 1.94 (d, *J* = 5.0 Hz, 0.5H), 1.31-1.27 (m, 3H), 1.26 (d, *J* = 6.5 Hz, 3H).

13C NMR (100 MHz, CDCl3): δ 161.3, 161.2, 134.2, 134.1, 119.2, 119.2, 116.4, 116.3, 104.2, 104.0, 79.1, 77.8, 70.6, 69.5, 18.6, 18.1, 15.5, 13.7.

HRMS (ESI) *m/z* calcd. for C11H13NNaO2 [M + Na]+: 214.0838, found: 214.0835.

**(±)-*cis*-4-(2-Hydroxy-1,2-diphenylethoxy)benzonitrile 39 [2247038-13-5].** This compound was prepared according to the general procedure 5.2. The reaction was conducted at 60 °C and irradiated with 2 w white LED (at approximately 1 cm away from the light source) for 24 hours. The resulting residue was purified by column chromatography using PE/EtOAc (4:1) as eluent. The title compound was obtained as colorless oil (143 mg, 91% yield).

1H NMR (400 MHz, CDCl3): δ 7.48 (d, *J* = 8.9 Hz, 2H), 7.25-7.19 (m, 6H), 7.11-7.09 (m, 2H), 7.03-7.00 (m, 2H), 6.93 (d, *J* = 8.8 Hz, 2H), 5.17 (d, *J* = 7.6 Hz, 1H), 4.98-4.96 (m, 1H), 3.05 (d, *J* = 2.2 Hz, 1H).

13C NMR (100 MHz, CDCl3): δ 161.0, 138.3, 136.1, 134.0, 128.6, 128.5, 128.3, 128.2, 127.4, 127.2, 119.0, 116.8, 104.6, 85.7, 78.4.

HRMS (ESI) *m/z* calcd. for C21H17NNaO2 [M + Na]+: 338.1151, found: 338.1149.

**4-(3-Hydroxypropoxy)benzonitrile 40 [147749-97-1].** This compound was prepared according to the general procedure 5.2. The reaction was conducted at 60 °C and irradiated with 2 w white LED (at approximately 1 cm away from the light source) for 24 hours. The resulting residue was purified by column chromatography using PE/EtOAc (4:1) as eluent. The title compound was obtained as colorless oil (75 mg, 85% yield). Data are as follows and matching with the previous literature17.

m.p. 34-35 °C.

1H NMR (400 MHz, CDCl3): δ 7.53 (d, *J* = 8.8 Hz, 2H), 6.93 (d, *J* = 8.8 Hz, 2H), 4.14 (t, *J* = 6.4 Hz, 2H), 3.82 (t, *J* = 5.6 Hz, 2H), 2.06-2.00 (m, 3H).

13C NMR (100 MHz, CDCl3): δ 162.3, 134.0, 119.3, 115.3, 103.8, 65.5, 59.4, 31.8.

**4-(4-Hydroxybutoxy)benzonitrile 41 [97844-76-3].** This compound was prepared according to the general procedure 5.2. The reaction was conducted at 60 °C and irradiated with 2 w white LED (at approximately 1 cm away from the light source) for 24 hours. The resulting residue was purified by column chromatography using PE/EtOAc (4:1) as eluent. The title compound was obtained as colorless oil (79 mg, 83% yield). Data are as follows and matching with the previous literature18.

m.p. 62-63 °C.

1H NMR (400 MHz, CDCl3): δ 7.57 (d, *J* = 8.8 Hz, 2H), 6.93 (d, *J* = 8.8 Hz, 2H), 4.05 (t, *J* = 6.4 Hz, 2H), 3.73 (t, *J* = 6.4 Hz, 2H), 1.95-1.88 (m, 2H), 1.79-1.72 (m, 2H), 1.60 (br, 1H).

13C NMR (100 MHz, CDCl3): δ 162.3, 134.0, 119.3, 115.2, 103.6, 68.2, 62.2, 29.1, 25.6.

HRMS (ESI) *m/z* calcd. for C11H13NNaO2 [M + Na]+: 214.0844, found: 214.0835.

***tert*-Butyl-(2-(4-cyanophenoxy)ethyl)(2-hydroxyethyl)carbamate 42 [2247038-16-8].** This compound was prepared according to the general procedure 5.2. The reaction was conducted at 60 °C and irradiated with 2 w white LED (at approximately 1 cm away from the light source) for 24 hours. The resulting residue was purified by column chromatography using PE/EtOAc (3:1) as eluent. The title compound was obtained as colorless oil (126 mg, 82% yield).

1H NMR (400 MHz, CDCl3): δ 7.57 (d, *J* = 8.4 Hz, 2H), 6.94 (d, *J* = 8.4 Hz, 2H), 4.20-4.14 (m, 2H), 3.77 (br, 2H), 3.66 (br, 2H), 3.50 (br, 2H), 3.01 (s, 0.5H), 2.25 (s, 0.5H), 1.45 (s, 9H).

13C NMR (100 MHz, CDCl3): δ 161.9, 134.2, 119.1, 115.3, 104.5, 80.7, 67.0, 62.5, 61.9, 51.9, 48.3, 28.5.

HRMS (ESI) *m/z* calcd. for C16H22N2NaO4 [M + Na]+: 329.1472, found: 329.1471.

**(*S*)-4-((1-(tert-butylamino)-3-hydroxypropan-2-yl)oxy)benzonitrile 43-1.** This compound was prepared according to the general procedure 5.2. The reaction was conducted at 40 °C and irradiated with 2 w white LED (at approximately 1 cm away from the light source) for 12 hours. The resulting residue was purified by column chromatography using DCM/MeOH (15:1) as eluent. The title compound was obtained as a white solid (34 mg, 27% yield).

[α]20D = - 8.6° (c = 0.28, CHCl3).

m.p. 73-74 °C.

1H NMR (600 MHz, CDCl3): δ 7.58 (d, *J* = 8.9 Hz, 2H), 6.98 (d, *J* = 8.9 Hz, 2H), 4.05-4.00 (m, 2H), 3.96-3.92 (m, 1H), 2.88-2.86 (m, 1H), 2.68-2.64 (m, 1H), 1.12 (s, 9H).

13C NMR (150 MHz, CDCl3): δ 162.2, 134.1, 119.3, 115.4, 104.4, 70.9, 68.4, 50.7, 44.5, 29.3.

HRMS (ESI) *m/z* calcd. for C14H21N2O2 (M+H)+: 249.1598, found: 249.1591.

**(*S*)-4-((1-(tert-butylamino)-3-hydroxypropan-2-yl)oxy)benzonitrile 43-2.** This compound was prepared according to the general procedure 5.2. The reaction was conducted at 40 °C and irradiated with 2 w white LED (at approximately 1 cm away from the light source) for 12 hours. The resulting residue was purified by column chromatography using DCM/MeOH (15:1) as eluent. The title compound was obtained as a white solid (84 mg, 68% yield).

[α]20D = + 2.6° (c = 0.78, CHCl3).

m.p. 84-85 °C.

1H NMR (600 MHz, CDCl3): δ 7.58 (d, *J* = 8.8 Hz, 2H), 7.02 (d, *J* = 8.8 Hz, 2H), 4.54 (s, 1H), 3.99-3.91 (m, 3H), 3.14-3.09 (m, 2H), 1.18 (s, 9H).

13C NMR (150 MHz, CDCl3): δ 160.8, 134.3, 119.1, 116.4, 104.7, 75.4, 64.5, 51.9, 45.0, 28.4.

HRMS (ESI) *m/z* calcd. for C14H21N2O2 (M+H)+: 249.1598, found: 249.1591.

**4-(2-Hydroxy-2-methylpropoxy)benzonitrile 44 [1182426-00-1].** This compound was prepared according to the general procedure 5.2. The reaction was conducted at 60 °C and irradiated with 2 w white LED (at approximately 1 cm away from the light source) for 24 hours. The resulting residue was purified by column chromatography using PE/EtOAc (3:1) as eluent. The title compound was obtained as a white solid (81 mg, 85% yield).

m.p. 89-90 °C.

1H NMR (400 MHz, CDCl3): δ 7.56 (d, *J* = 8.6 Hz, 2H), 6.96 (d, *J* = 8.7 Hz, 2H), 3.82 (s, 2H), 2.31 (s, 1H), 1.34 (s, 6H).

13C NMR (100 MHz, CDCl3): δ 162.1, 134.1, 119.2, 115.4, 104.3, 76.2, 70.0, 26.2.

HRMS (ESI) *m/z* calcd. for C11H13NNaO2 [M + Na]+: 214.0838, found: 214.0841.

**(±)-4-((4-Hydroxy-4-methylpentan-2-yl)oxy)benzonitrile 45.** This compound was prepared according to the general procedure 5.2. The reaction was conducted at 40 °C and irradiated with 2 w white LED (at approximately 1 cm away from the light source) for 12 hours. The resulting residue was purified by column chromatography using PE/EtOAc (3:1) as eluent. The title compound was obtained as colorless oil (109 mg, 90% yield).

1H NMR (400 MHz, CDCl3): δ 7.58-7.55 (m, 2H), 6.97-6.94 (m, 2H), 4.82-4.74 (m, 1H), 2.22 (s, 1H), 2.07-2.01 (m, 1H), 1.76-1.71 (m, 1H), 1.32 (d, *J* = 6.0 Hz, 3H), 1.25 (s, 3H), 1.23 (s, 3H).

13C NMR (100 MHz, CDCl3): δ 160.7, 134.2, 119.3, 116.3, 104.1, 72.1, 70.3, 49.2, 30.1, 30.0, 20.6.

HRMS (ESI) *m/z* calcd. for C13H17NNaO2 [M + Na]+: 242.1151, found: 242.1145.

**4-(((*1R,2R,3S,5R*)-2-Hydroxy-2,6,6-trimethylbicyclo[3.1.1]heptan-3-yl)oxy)benzonitrile 46.** This compound was prepared according to the general procedure 5.2. The reaction was conducted at 40 °C and irradiated with 2 w white LED (at approximately 1 cm away from the light source) for 12 hours. The resulting residue was purified by column chromatography using PE/EtOAc (3:1) as eluent. The title compound was obtained as a white solid (129 mg, 95% yield).

[α]20D = - 58.7° (c = 0.31, CHCl3).

m.p. 79-80 °C.

1H NMR (400 MHz, CDCl3): δ 7.63-7.59 (m, 2H), 7.02-6.99 (m, 2H), 4.63-4.59 (m, 1H), 3.24 (s, 1H), 2.62-2.55 (m, 1H), 2.31-2.25 (m, 1H), 2.08 (t, *J* = 5.8 Hz, 1H), 2.03-1.98 (m, 1H), 1.78-1.73 (m, 1H), 1.61-1.59 (m, 1H), 1.35 (s, 3H), 1.32 (s, 3H), 1.03 (s, 3H).

13C NMR (100 MHz, CDCl3): δ 160.8, 134.2, 119.0, 116.7, 104.8, 76.2, 73.9, 53.9, 40.4, 38.6, 35.2, 30.6, 28.3, 27.9, 24.5.

HRMS (ESI) *m/z* calcd. for C17H21NNaO2 [M + Na]+: 294.1465, found: 294.1458.

**4-(((*1S,3R,5S*)-2-Hydroxy-2,6,6-trimethylbicyclo[3.1.1]heptan-3-yl)oxy)benzonitrile 47.** This compound was prepared according to the general procedure 5.2. The reaction was conducted at 40 °C and irradiated with 2 w white LED (at approximately 1 cm away from the light source) for 12 hours. The resulting residue was purified by column chromatography using PE/EtOAc (3:1) as eluent. The title compound was obtained as a white solid (122 mg, 90% yield).

[α]20D = + 66.8° (c = 0.68, CHCl3).

m.p. 82-83 °C.

1H NMR (400 MHz, CDCl3): δ 7.62-7.59 (m, 2H), 7.02-6.99 (m, 2H), 4.63-4.59 (m, 1H), 3.24 (s, 1H), 2.62-2.55 (m, 1H), 2.31-2.25 (m, 1H), 2.08 (t, *J* = 1.8 Hz, 1H), 2.03-1.98 (m, 1H), 1.78-1.73 (m, 1H), 1.60 (d, *J* = 10.6 Hz, 1H), 1.35 (s, 3H), 1.32 (s, 3H), 1.03 (s, 3H).

13C NMR (100 MHz, CDCl3): δ 160.9, 134.3, 119.1, 116.7, 104.8, 76.2, 73.9, 53.9, 40.5, 38.6, 35.2, 30.7, 28.3, 27.9, 24.6.

HRMS (ESI) *m/z* calcd. for C17H21NNaO2 [M + Na]+: 294.1465, found: 294.1458.

**1-(Benzyloxy)-4-(trifluoromethyl)benzene 48 [70097-65-3].** This compound was prepared according to the general procedure 5.1. The reaction was conducted at 60 °C and irradiated with 2 w white LED (at approximately 1 cm away from the light source) for 24 hours. The resulting residue was purified by column chromatography using PE/EtOAc (100:1) as eluent. The title compound was obtained as a white solid (102 mg, 81% yield). Data are as follows and matching with the previous literature19.

m.p. 83-84 °C.

1H NMR (400 MHz, CDCl3): δ 7.55 (d, *J* = 8.8 Hz, 2H), 7.45-7.33 (m, 5H), 7.04 (d, *J* = 8.8 Hz, 2H), 5.11 (s, 2H).

13C NMR (100 MHz, CDCl3): δ 161.3, 136.4, 128.8, 128.6, 128.4, 127.1 (q, *J* = 3.7 Hz), 124.6 (q, *J* = 269.3 Hz), 123.3 (q, *J* = 32.5 Hz), 115.0, 70.3.

19F NMR (376 MHz, CDCl3): δ -61.41 (s, 3F).

**Methyl 4-(benzyloxy)benzoate 49 [32122-11-5].** This compound was prepared according to the general procedure 5.1. The reaction was conducted at 60 °C and irradiated with 2 w white LED (at approximately 1 cm away from the light source) for 24 hours. The resulting residue was purified by column chromatography using PE/EtOAc (10:1) as eluent. The title compound was obtained as white solid (103 mg, 85% yield). Data are as follows and matching with the previous literature20.

m.p. 96-97 °C.

1H NMR (400 MHz, CDCl3): δ 8.00 (d, *J* = 8.8 Hz, 2H), 7.45-7.34 (m, 5H), 7.00 (d, *J* = 8.8 Hz, 2H), 5.12 (s, 2H), 3.89 (s, 3H).

13C NMR (100 MHz, CDCl3): δ 166.9, 162.6, 136.4, 131.7, 128.8, 128.3, 127.6, 123.0, 114.6, 70.2, 52.0.

**1-(4-(Benzyloxy)phenyl)ethan-1-one 50 [54696-05-8].** This compound was prepared according to the general procedure 5.1. The reaction was conducted at 60 °C and irradiated with 2 w white LED (at approximately 1 cm away from the light source) for 24 hours. The resulting residue was purified by column chromatography using PE/EtOAc (10:1) as eluent. The title compound was obtained as a white solid (90 mg, 80% yield). Data are as follows and matching with the previous literature13.

m.p. 91-92 °C.

1H NMR (400 MHz, CDCl3): δ 7.94 (d, *J* = 8.8 Hz, 2H), 7.45-7.35 (m, 5H), 7.01 (d, *J* = 8.8 Hz, 2H), 5.14 (s, 2H), 2.56 (s, 3H).

13C NMR (100 MHz, CDCl3): δ 196.8, 162.8, 136.3, 130.7, 130.7, 128.8, 128.4, 127.6, 114.7, 70.3, 26.5.

**4-(Benzyloxy)benzaldehyde 51 [4397-53-9].** This compound was prepared according to the general procedure 5.1. The reaction was conducted at 60 °C and irradiated with 2 w white LED (at approximately 1 cm away from the light source) for 24 hours. The resulting residue was purified by column chromatography using PE/EtOAc (20:1) as eluent. The title compound was obtained as a white solid (101 mg, 95% yield). Data are as follows and matching with the previous literature21.

m.p. 69-70 °C.

1H NMR (400 MHz, CDCl3): δ 9.89 (s, 1H), 7.84 (d, *J* = 8.8 Hz, 2H), 7.45-7.34 (m, 5H), 7.08 (d, *J* = 8.8 Hz, 2H), 5.16 (s, 2H).

13C NMR (100 MHz, CDCl3): δ 190.8, 163.8, 136.0, 132.1, 130.2, 128.8, 128.4, 127.6, 115.2, 70.4.

**1-(Benzyloxy)-4-chlorobenzene 52 [7700-27-8].** This compound was prepared according to the general procedure 5.1. The reaction was conducted at 60 °C and irradiated with 2 w white LED (at approximately 1 cm away from the light source) for 24 hours. The resulting residue was purified by column chromatography using PE/EtOAc (30:1) as eluent. The title compound was obtained as colorless oil (89 mg, 82% yield). Data are as follows and matching with the previous literature22.

1H NMR (400 MHz, CDCl3): δ 7.43-7.33 (m, 5H), 7.23 (d, *J* = 8.8 Hz, 2H), 6.90 (d, *J* = 8.8 Hz, 2H), 5.04 (s, 2H).

13C NMR (100 MHz, CDCl3): δ 157.5, 136.8, 129.5, 128.8, 128.2, 127.6, 126.0, 116.4, 70.5.

**1-(Benzyloxy)-4-fluorobenzene 53 [370-78-5].** This compound was prepared according to the general procedure 5.1. The reaction was conducted at 60 °C and irradiated with 2 w white LED (at approximately 1 cm away from the light source) for 24 hours. The resulting residue was purified by column chromatography using PE/EtOAc (30:1) as eluent. The title compound was obtained as a white solid (82 mg, 81% yield). Data are as follows and matching with the previous literature23.

m.p. 51-52 °C.

1H NMR (400 MHz, CDCl3): δ 7.44-7.32 (m, 5H), 7.00-6.90 (m, 2H), 5.03 (s, 2H).

13C NMR (100 MHz, CDCl3): δ 157.5 (d, *J* = 237.0 Hz), 155.1 (d, *J* = 2.1 Hz), 137.0, 128.8, 128.2, 127.6, 116.1 (d, *J* = 3.9 Hz), 116.0 (d, *J* = 22.9 Hz), 70.9.

19F NMR (376 MHz, CDCl3): δ -123.60- -123.67 (m, 1F).

HRMS (ESI) *m/z* calcd. for C13H17NNaO4 [M + Na]+: 274.1055, found: 274.1050.

**Benzyloxybenzene 54 [946-80-5].** This compound was prepared according to the general procedure 5.1. The reaction was conducted at 60 °C and irradiated with 2 w white LED (at approximately 1 cm away from the light source) for 24 hours. The resulting residue was purified by column chromatography using PE/EtOAc (30:1) as eluent. The title compound was obtained as a white solid (72 mg, 78% yield). Data are as follows and matching with the previous literature24.

m.p. 35-36 °C.

1H NMR (400 MHz, CDCl3): δ 7.47-7.28 (m, 7H), 7.01-6.96 (m, 3H), 5.08 (s, 2H).

13C NMR (100 MHz, CDCl3): δ 158.9, 137.2, 129.6, 128.7, 128.0, 127.6, 121.1, 115.0, 70.0.

**1-(Benzyloxy)-4-methoxybenzene 55 [6630-18-8].** This compound was prepared according to the general procedure 5.1. The reaction was conducted at 60 °C and irradiated with 2 w white LED (at approximately 1 cm away from the light source) for 24 hours. The resulting residue was purified by column chromatography using PE/EtOAc (20:1) as eluent. The title compound was obtained as a white solid (64 mg, 60% yield). Data are as follows and matching with the previous literature25.

m.p. 68-69 °C.

1H NMR (400 MHz, CDCl3): δ 7.44-7.32 (m, 5H), 6.92 (d, *J* = 9.1 Hz, 2H), 6.83 (d, *J* = 9.2 Hz, 2H), 5.02 (s, 2H), 3.77 (s, 3H).

13C NMR (100 MHz, CDCl3): δ 154.1, 153.1, 137.4, 128.7, 128.0, 127.6, 116.0, 114.8, 70.8, 55.8.

**2-(Benzyloxy)naphthalene 56 [613-62-7].** This compound was prepared according to the general procedure 5.1. The reaction was conducted at 60 °C and irradiated with 2 w white LED (at approximately 1 cm away from the light source) for 24 hours. The resulting residue was purified by column chromatography using PE/EtOAc (20:1) as eluent. The title compound was obtained as a white solid (96 mg, 82% yield). Data are as follows and matching with the previous literature26.

m.p. 98-99 °C.

1H NMR (400 MHz, CDCl3): δ 7.79-7.72 (m, 3H), 7.51-7.49 (m, 2H), 7.46-7.40 (m, 3H), 7.37-7.33 (m, 2H), 7.25-7.23 (m, 2H), 5.19 (s, 2H).

13C NMR (100 MHz, CDCl3): δ 156.9, 137.1, 134.7, 129.6, 129.2, 128.7, 128.1, 127.8, 127.7, 126.9, 126.5, 123.8, 119.2, 107.3, 70.2.

**3-(Benzyloxy)quinoline 57 [162976-62-7].** This compound was prepared according to the general procedure 5.1. The reaction was conducted at 60 °C and irradiated with 2 w white LED (at approximately 1 cm away from the light source) for 24 hours. The resulting residue was purified by column chromatography using PE/EtOAc (20:1) as eluent. The title compound was obtained as a white solid (94 mg, 80% yield). Data are as follows and matching with the previous literature27.

m.p. 61-62 °C.

1H NMR (400 MHz, CDCl3): δ 8.76 (d, *J* = 2.9 Hz, 1H), 8.05 (d, *J* = 8.3 Hz, 1H), 7.72 (d, *J* = 8.1 Hz, 1H), 7.59-7.35 (m, 8H), 5.20 (s, 2H).

13C NMR (100 MHz, CDCl3): δ 152.3, 144.9, 143.8, 136.1, 129.3, 128.9, 128.5, 127.7, 127.2, 126.9, 126.9, 113.8, 70.5.

HRMS (ESI) *m/z* calcd. for C16H14NO5 (M+H)+: 236.1070, found: 236.1072.

**5-Methoxypicolinonitrile 58 [89809-63-2].** This compound was prepared according to the general procedure 5.1 using 5-Bromo-2-cyanopyridine or 5-Chloro-2-cyanopyridine as the starting material. The reaction was conducted at 60 °C and irradiated with 2 w white LED (at approximately 1 cm away from the light source) for 24 or 36 hours. The resulting residue was purified by column chromatography using PE/EtOAc (10:1) as eluent. The title compound was obtained as a white solid (60 mg, 90% yield) from 5-Bromo-2-cyanopyridine and (58 mg, 88% yield) from 5-Chloro-2-cyanopyridine. Data are as follows and matching with the previous literature28.

m.p. 88-89 °C.

1H NMR (400 MHz, CDCl3): δ 8.37 (d, *J* = 2.9 Hz, 1H), 7.65 (d, *J* = 8.6 Hz, 1H), 7.25-7.23 (m, 1H), 3.93 (s, 3H).

13C NMR (100 MHz, CDCl3): δ 158.0, 140.3, 129.7, 125.5, 119.9, 117.6, 56.1.

HRMS (ESI) *m/z* calcd. for C7H7N2O (M+H)+: 135.0553, found: 135.0548.

**5-(2-(2-Methoxyethoxy)ethoxy)picolinonitrile 59 [1880584-64-4].** This compound was prepared according to the general procedure 5.1. The reaction was conducted at 60 °C and irradiated with 2 w white LED (at approximately 1 cm away from the light source) for 24 hours. The resulting residue was purified by column chromatography using PE/EtOAc (5:1) as eluent. The title compound was obtained as a white solid (100 mg, 90% yield).

m.p. 41-42 °C.

1H NMR (400 MHz, CDCl3): δ 8.36 (d, *J* = 2.8 Hz, 1H), 7.61 (d, *J* = 8.6 Hz, 1H), 7.27-7.24 (m, 1H), 4.22 (t, *J* = 4.4 Hz, 2H), 3.87 (t, *J* = 4.7 Hz, 2H), 3.68 (t, *J* = 4.3 Hz, 2H), 3.53 (t, *J* = 4.8 Hz, 2H), 3.35 (s, 3H).

13C NMR (100 MHz, CDCl3): δ 157.3, 140.6, 129.5, 125.3, 120.6, 117.5, 71.9, 70.9, 69.3, 68.4, 59.1.

HRMS (ESI) *m/z* calcd. for C11H14N2NaO3 [M + Na]+: 245.0897, found: 245.0906.

**(±)-*cis*-2-(*p*-Tolyloxy)cyclohexan-1-ol 60.** This compound was prepared according to the general procedure 5.2 using *p*-Iodotoluene as the starting material. The reaction was conducted at 80 °C and irradiated with 2 w white LED (at approximately 1 cm away from the light source) for 24 hours. The resulting residue was purified by column chromatography using PE/EtOAc (10:1) as eluent. The title compound was obtained as colorless oil (84 mg, 82% yield). Data are as follows and matching with the previous literature29.

1H NMR (600 MHz, CDCl3): δ 7.09 (d, *J* = 8.5 Hz, 2H), 6.86 (d, *J* = 8.5 Hz, 2H), 4.33-4.32 (m, 1H), 3.94 (s, 1H), 2.41-2.39 (m, 1H), 2.30 (s, 3H), 1.99-1.88 (m, 2H), 1.75-1.59 (m, 4H), 1.39-1.31 (m, 2H).

13C NMR (150 MHz, CDCl3): δ 155.3, 130.7, 130.0, 116.6, 77.8, 69.3, 30.5, 26.6, 21.8, 21.5, 20.6.

HRMS (ESI) *m/z* calcd. for C13H18NaO2 [M + Na]+: 229.1199, found: 229.1197.

**(±)-*cis*-2-(4-Methoxyphenoxy)cyclohexan-1-ol 61.** This compound was prepared according to the general procedure 5.2 using 4-Iodoanisole as the starting material. The reaction was conducted at 80 °C and irradiated with 2 w white LED (at approximately 1 cm away from the light source) for 36 hours. The resulting residue was purified by column chromatography using PE/EtOAc (8:1) as eluent. The title compound was obtained as a white solid (83 mg, 75% yield).

m.p. 39-40°C.

1H NMR (600 MHz, CDCl3): δ 6.89-6.88 (m, 2H), 6.82-6.81 (m, 2H), 4.22-4.21 (m, 1H), 3.91 (s, 1H), 3.76 (s, 3H), 2.36 (s, 1H), 1.94-1.85 (m, 2H), 1.73-1.55 (m, 4H), 1.38-1.28 (m, 2H).

13C NMR (150 MHz, CDCl3): δ 154.4, 151.4, 118.2, 114.7, 78.8, 69.3, 55.7, 30.5, 26.7, 21.8, 21.6.

HRMS (ESI) *m/z* calcd. for C13H18NaO3 [M + Na]+: 245.1148, found: 245.1148.

**(±)-*cis*-4-((-2-Hydroxycyclohexyl)oxy)benzonitrile 62.** This compound was prepared according to the general procedure 5.2 using 4-Bromobenzonitrile or 4-Chlorobenzonitrile as the starting material. The reaction was conducted at 40 or 60 °C and irradiated with 2 w white LED (at approximately 1 cm away from the light source) for 12 hours. The resulting residue was purified by column chromatography using PE/EtOAc (3:1) as eluent. The title compound was obtained as colorless oil (99 mg, 91% yield) from 4-Bromobenzonitrile and (101 mg, 93% yield) from 4-Chlorobenzonitrile.

1H NMR (600 MHz, CDCl3): δ 7.58 (d, *J* = 8.8 Hz, 2H), 6.99 (d, *J* = 8.8 Hz, 2H), 4.49-4.46 (m, 1H), 3.97-3.94 (m, 1H), 2.00-1.89 (m, 3H), 1.76-1.60 (m, 4H), 1.44-1.34 (m, 2H).

13C NMR (150 MHz, CDCl3): δ 161.1, 134.2, 119.2, 116.6, 104.4, 77.8, 69.4, 30.6, 26.5, 21.6.

HRMS (ESI) *m/z* calcd. for C13H15NNaO2 [M + Na]+: 240.0995, found: 240.0993.

**(±)-*cis*-4-((2-Hydroxycyclohexyl)oxy)-3-methylbenzonitrile 63.** This compound was prepared according to the general procedure 5.2. The reaction was conducted at 40 °C and irradiated with 2 w white LED (at approximately 1 cm away from the light source) for 12 hours. The resulting residue was purified by column chromatography using PE/EtOAc (3:1) as eluent. The title compound was obtained as white solid (103 mg, 89% yield).

m.p. 74-75 °C.

1H NMR (600 MHz, CDCl3): δ 7.45 (d, *J* = 2.12, 1H), 7.43 (s, 1H), 6.90 (d, *J* = 2.12, 1H), 4.55-4.54 (m, 1H), 3.93 (s, 1H), 2.26 (s, 3H), 2.02-1.97 (m, 2H), 1.91-1.86 (m, 1H), 1.76-1.74 (m, 2H), 1.64-1.55 (m, 2H), 1.41-1.39 (m, 2H).

13C NMR (150 MHz, CDCl3): δ 159.2, 134.6, 131.9, 129.1, 119.5, 112.7, 103.8, 70.0, 30.7, 26.8, 22.0, 21.4, 16.5.

HRMS (ESI) *m/z* calcd. for C14H17NNaO2 [M + Na]+: 254.1151, found: 254.1143.

**(±)-*cis*-4-((2-Hydroxycyclohexyl)oxy)-2-methoxybenzonitrile 64.** This compound was prepared according to the general procedure 5.2. The reaction was conducted at 40 °C and irradiated with 2 w white LED (at approximately 1 cm away from the light source) for 12 hours. The resulting residue was purified by column chromatography using PE/EtOAc (2:1) as eluent. The title compound was obtained as colorless oil (116 mg, 94% yield).

1H NMR (600 MHz, CDCl3): δ 7.41 (d, *J* = 2.13, 1H), 6.52-6.50 (m, 2H), 4.46-4.44 (m, 1H), 3.9 (s, 1H), 3.86 (s, 3H), 2.18 (s, 1H), 1.98-1.94 (m, 1H), 1.86-1.84 (m, 1H), 1.71-1.68 (m, 2H), 1.63-1.59 (m, 2H), 1.39-1.37 (m, 2H).

13C NMR (150 MHz, CDCl3): δ 162.9, 162.8, 134.9, 116.9, 107.3, 100.4, 94.0, 77.8, 69.3, 56.1, 30.4, 26.6, 21.5.

HRMS (ESI) *m/z* calcd. for C14H17NNaO3 [M + Na]+: 270.1101, found: 270.1092.

**(±)-*cis*-4-((2-Hydroxycyclohexyl)oxy)-2-(trifluoromethoxy)benzonitrile 65.** This compound was prepared according to the general procedure 5.2. The reaction was conducted at 40 °C and irradiated with 2 w white LED (at approximately 1 cm away from the light source) for 12 hours. The resulting residue was purified by column chromatography using PE/EtOAc (3:1) as eluent. The title compound was obtained as a white solid (143 mg, 95% yield).

m.p. 102-103 °C.

1H NMR (600 MHz, CDCl3): δ 7.73 (d, *J* = 8.5 Hz, 1H), 7.31 (s, 1H), 7.16 (d, *J* = 7.1 Hz, 1H), 4.56-4.55 (m, 1H), 3.95 (s, 1H), 2.04 (s, 1H), 2.00-1.98 (m, 1H), 1.89-1.86 (m, 1H), 1.73-1.59 (m, 4H), 1.41-1.40 (m, 2H).

13C NMR (150 MHz, CDCl3): δ 161.1, 136.7, 134.9 (q, *J* = 32.3 Hz), 122.3 (q, *J* = 272.4 Hz), 118.3, 115.9, 115.3 (q, *J* = 4.8 Hz), 101.4, 78.5, 69.5, 30.5, 26.5, 21.7, 21.3.

19F NMR (376 MHz, CDCl3): δ - 62.18 (s, 3F).

HRMS (ESI) *m/z* calcd. for C14H14F3NNaO3 [M + Na]+: 324.0818, found: 324.0812.

**(±)-*cis*-4-((2-Hydroxycyclohexyl)oxy)-2-(trifluoromethyl)benzonitrile 66.** This compound was prepared according to the general procedure 5.2. The reaction was conducted at 40 °C and irradiated with 2 w white LED (at approximately 1 cm away from the light source) for 12 hours. The resulting residue was purified by column chromatography using PE/EtOAc (3:1) as eluent. The title compound was obtained as colorless oil (140 mg, 98% yield).

1H NMR (600 MHz, CDCl3): δ 7.58 (d, *J* = 8.46, 1H), 7.26 (s, 1H), 6.93-6.92 (m, 2H), 4.49 (m, 1H), 3.39 (s, 1H), 2.11-2.08 (m, 1H), 1.99-1.97 (m, 1H), 1.88-1.85 (m, 1H), 1.72 (s, 1H), 1.65-1.59 (m, 2H), 1.39-1.38 (m, 2H).

13C NMR (150 MHz, CDCl3): δ 162.5, 151.5, 135.1, 120.3 (q, *J* = 259.3 Hz), 114.7, 114.2, 109.5, 98.8, 78.6, 69.4, 30.5, 26.5, 21.5 (d, *J* = 38.9 Hz).

19F NMR (376 MHz, CDCl3): δ -57.63.

HRMS (ESI) *m/z* calcd. for C14H14F3NNaO2 [M + Na]+: 308.0869, found: 308.0860.

**(±)-*cis*-2,6-Difluoro-4-((2-hydroxycyclohexyl)oxy)benzonitrile 67.** This compound was prepared according to the general procedure 5.2. The reaction was conducted at 40 °C and irradiated with 2 w white LED (at approximately 1 cm away from the light source) for 12 hours. The resulting residue was purified by column chromatography using PE/EtOAc (3:1) as eluent. The title compound was obtained as colorless oil (123 mg, 97% yield).

1H NMR (300 MHz, CDCl3): δ 7.26 (s, 1H), 6.61 (s, 1H), 6.58 (s, 1H), 4.45-4.43 (m, 1H), 3.39 (s, 1H), 2.13 (s, 1H), 2.01-1.99 (m, 1H), 1.89-1.86(m, 1H), 1.71-1.53 (m, 4H), 1.40-1.37 (m, 2H).

13C NMR (100 MHz, CDCl3): δ 165.3 (d, *J* = 7.7 Hz), 163.8 (td, *J* = 12.5, 1.7), 163.6 (d, *J* = 7.8 Hz), 109.7, 100.3 (dd, *J* = 22.86, 3.05), 84.4 (t, *J* =19.43), 79.2, 69.3, 30.4, 26.5, 21.4 (d, *J* = 37.8 Hz).

19F NMR (376 MHz, CDCl3): δ -102.92, -102.94 (m, 2F).

HRMS (ESI) *m/z* calcd. for C13H13F2NNaO2 [M + Na]+: 276.0807, found: 276.0797.

# 7. Synthetic Applications

**7.1 Preparation of key intermediate of drugs**

**7.1.1 Preparation of key intermediate of Pioglitazone**

According to the general procedure **5.1**. In a glove box, NiBr2 (8.7 mg, 0.04 mmol, 0.08 eq.) Na2CO3 (10.6 mg, 0.1 mmol, 0.20 eq.) and DMF (0.5 mL) were added to a 10-mL Schlenk tube with a stir bar. And then 4-bromobenzaldehyde (92.3 mg, 0.5 mmol, 1.0 eq.), 2-(5-ethylpyridin-2-yl)ethan-1-ol (151.1 mg, 1.0 mmol, 2.0 eq.), DCyMA (175.8 mg, 0.9 mmol, 1.8 eq.) and a DMF solution of **Et-DABDP** (100 μL, 0.0025 M/L, 2.5 × 10-4 mmol, 5 × 10-4 eq) were added to the reaction mixture successively. The reaction was then heated to 80 °C and irradiated on white LEDs (2 w, at approximately 1 cm away from the light source) for 24 h. After work-up, the residue was purified by silica gel chromatography PE/EtOAc (10:1) to give the desired compound **70** as a colorless oil (115 mg, yield: 90%). Data are as follows and matching with the previous literature30.

1H NMR (400 MHz, CDCl3): δ 9.87 (s, 1H), 8.40 (d, *J* = 2.3 Hz, 1H), 7.81 (d, *J* = 8.7 Hz, 2H), 7.47-7.45 (m, 1H), 7.18 (d, *J* = 7.9 Hz, 1H), 7.00 (d, *J* = 8.7 Hz, 2H), 4.44 (t, *J* = 6.7 Hz, 2H), 3.26 (t, *J* = 6.7 Hz, 2H), 2.63 (q, *J* = 7.6 Hz, 2H), 1.24 (t, *J* = 7.6 Hz, 3H).

13C NMR (100 MHz, CDCl3): δ 190.9, 164.1, 155.2, 149.3, 137.4, 136.0, 132.1, 130.1, 123.4, 115.0, 67.8, 37.5, 25.9, 15.5.

HRMS (ESI) m/z calcd. for C16H18NO2 [M + H]+: 256.1332, found: 256.1332.

**7.1.2 Preparation of key intermediate of Pimavanserin**

According to the general procedure **5.1**. In a glove box, NiBr2 (8.7 mg, 0.04 mmol, 0.08 eq.) Na2CO3 (10.6 mg, 0.1 mmol, 0.20 eq.) and DMF (2.5 mL) were added to a 10-mL Schlenk tube with a stir bar. And then 4-bromobenzaldehyde (92.3 mg, 0.5 mmol, 1.0 eq.), *iso*-butanol (74 mg, 1.0 mmol, 2.0 eq.), DCyMA (175.8 mg, 0.9 mmol, 1.8 eq.) and a DMF solution of **Et-DABDP** (100 μL, 0.0025 M/L, 2.5 × 10-4 mmol, 5 × 10-4 eq) were added to the reaction mixture successively. The reaction was then heated to 80 °C and irradiated on white LEDs (2 w, at approximately 1 cm away from the light source) for 24 h. After work-up, the residue was purified by silica gel chromatography PE/EtOAc (10:1) to give the desired compound **72** as a colorless oil (62 mg, yield: 70%). Data are as follows and matching with the previous literature31.

1H NMR (400 MHz, CDCl3): δ 9.88 (s, 1H), 7.83 (d, *J* = 8.7 Hz, 2H), 6.99 (d, *J* = 8.7 Hz, 2H), 3.80 (d, *J* = 6.5 Hz, 2H), 2.15-2.09 (m, 1H), 1.04 (d, *J* = 6.7 Hz, 6H).

13C NMR (100 MHz, CDCl3): δ 190.9, 164.5, 132.1, 129.9, 114.9, 74.8, 28.3, 19.3.

**7.2 Late stage functionalization of bioactive molecules & drugs**

**7.2.1 Late stage functionalization of glucoside**

According to the general procedure **5.2**. In a glove box, NiBr2 (8.7 mg, 0.04 mmol, 0.08 eq.) and DMF (2.5 mL) were added to a 10-mL Schlenk tube with a stir bar. And then 4-bromobenzonitrile **1** (91 mg, 0.5 mmol, 1.0 eq.), **73b** (234.2 mg, 1.0 mmol, 2.0 eq.), DCyMA (175.8 mg, 0.9 mmol, 1.8 eq.) and a DMF solution of **Et-DABDP** (100 μL, 0.0025 M/L, 2.5 × 10-4 mmol, 5 × 10-4 eq) were added to the reaction mixture successively. The reaction was then heated to 60 °C and irradiated on white LEDs (2 w, at approximately 1 cm away from the light source) for 24 h. After work-up, the residue was analyzed by Shimadzu LC-20AD instrument and purified by normal phase preparative chromatography (Agilent 1260 Infinity, Chiral INC 5μ, *n*-hexane/isopropanol 70:30 (v/v)) to give the desired compound.


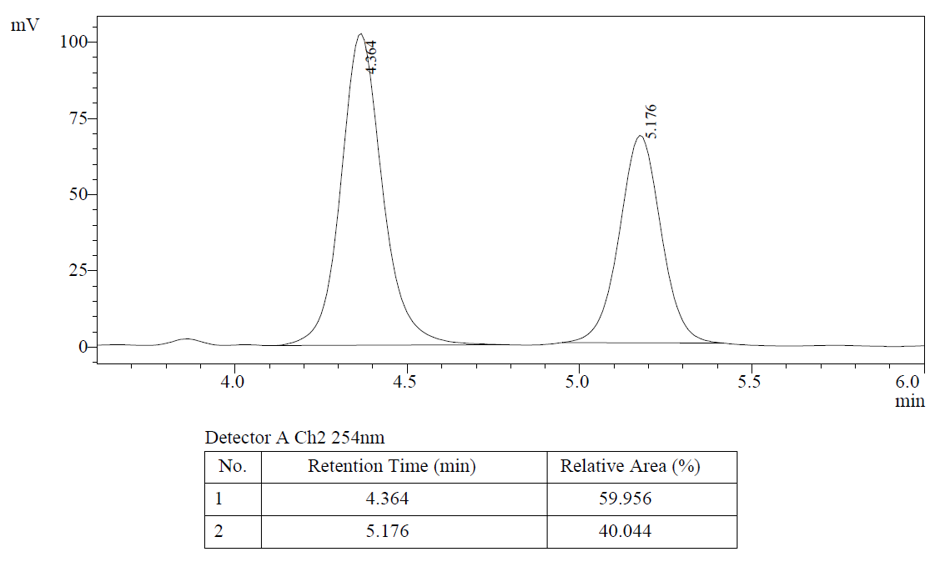


**73-*C2*:73-*C3*** = 1.5:1, HPLC conditions: Chiral INC column, n-hexane/isopropanol 70:30 (v/v); flow rate = 1 mL/min; UV detection at 254 nm; tR = 4.4 min (major), tR = 5.2 min (minor). The title compound **73-*C2*** was obtained as a white solid (93 mg, 56% yield).

[α]20D = + 50.1° (c = 0.69, CHCl3).

m.p. 164-165 ℃.

1H NMR (600 MHz, CDCl3): δ 7.53 (d, *J* = 8.6 Hz, 2H), 7.14 (d, *J* = 8.8 Hz, 2H), 4.83 (d, *J* = 3.9 Hz, 1H), 4.38 (t, *J* = 8.9 Hz, 1H), 3.93-3.90 (m, 1H), 3.84 (td, *J* = 9.2, 3.8 Hz, 1H), 3.79-3.76 (m, 1H), 3.75-3.72 (m, 2H), 3.46 (s, 3H), 2.17 (s, 1H), 1.45 (s, 1H), 1.35 (s, 3H).

13C NMR (150 MHz, CDCl3): δ 163.6, 133.8, 119.3, 117.9, 104.9, 100.0, 99.9, 80.3, 73.3, 72.3, 63.8, 62.5, 55.6, 29.1, 19.1.

HRMS (ESI) *m/z* calcd. for C17H21NNaO6 [M + Na]+: 358.1261, found: 358.1256.

The title compound **73-*C3*** was obtained as a white solid (62 mg, 37% yield). The structure was determined by single-crystal X-ray diffraction measurement. Single crystals suitable for X-ray diffraction measurement was grown from a solution of **73-*C3*** in *n*-pentane/dichloromethane.

[α]20D = + 110.5° (c = 0.38, CHCl3).

m.p. 115-116 ℃.

1H NMR (400 MHz, CDCl3): δ 7.57 (d, *J* = 8.8 Hz, 2H), 7.10 (d, *J* = 8.8 Hz, 2H), 4.87 (d, *J* = 3.6 Hz, 1H), 4.34-4.31 (m, 1H), 4.17 (t, *J* = 9.0 Hz, 1H), 3.92-3.88 (m, 1H), 3.79-3.71 (m, 2H), 3.63 (t, *J* = 9.0 Hz, 1H), 3.38 (s, 3H), 2.73 (s, 1H), 1.52 (s, 3H), 1.45 (s, 3H).

13C NMR (100 MHz, CDCl3): δ 163.5, 133.8, 119.4, 117.8, 104.7, 100.0, 99.9, 80.2, 73.2, 72.2, 63.7, 62.5, 55.6, 29.1, 19.0.

HRMS (ESI) *m/z* calcd. for C17H21NNaO6 [M + Na]+: 358.1261, found: 358.1256.

**7.2.2 Late stage functionalization of 3b,5-Dihydroxy-6b,7b:15b,16b-dimethylene-5b-androstan-17-one (CAS No. 82543-16-6)**

According to the general procedure **5.2**. In a glove box, NiBr2 (8.7 mg, 0.04 mmol, 0.08 eq.) and DMF (2.5 mL) were added to a 10-mL Schlenk tube with a stir bar. And then 4-bromobenzonitrile **1** (91 mg, 0.5 mmol), 3b,5-Dihydroxy-6b,7b:15b,16b-dimethylene-5b-androstan-17-one (330 mg. 1.0 mmol, 2.0 eq.), DCyMA (175.8 mg, 0.9 mmol, 1.8 eq.) and a DMF solution of **Et-DABDP** (100 μL, 0.0025 M/L, 2.5 × 10-4 mmol, 5 × 10-4 eq) were added to the reaction mixture successively. The reaction was then heated to 60 °C and irradiated on white LEDs (2 w, at approximately 1 cm away from the light source) for 48 h. After work-up, the residue was purified by silica gel chromatography PE/EtOAc (4:1) to give the desired compound **74** as a white solid (198 mg, 92% yield). [α]20D = + 3.4° (c = 0.88, CHCl3). m.p. 233-234 °C.

1H NMR (400 MHz, CDCl3): δ 7.59 (d, *J* = 7.7 Hz, 2H), 6.96 (d, *J* = 8.2 Hz, 2H), 4.74 (s, 1H), 3.01 (s, 1H), 2.41-2.38 (m, 1H), 2.23-2.15 (m, 3H), 1.80-1.71 (m, 6H), 1.56-1.50 (m, 2H), 1.30-1.28 (m, 4H), 1.19 (q, *J* = 7.5 Hz, 1H), 1.12 (s, 1H), 0.96 (s, 3H), 0.96 (s, 3H), 0.91 (s, 3H), 0.87-0.86 (m, 3H), 0.74-0.73 (m, 1H).

13C NMR (100 MHz, CDCl3): δ 160.3, 134.3, 119.1, 116.4, 104.6, 74.2, 73.3, 52.4, 43.1, 41.3, 40.7, 35.3, 33.6, 26.1, 23.8, 22.5, 21.4, 20.3, 19.1, 17.8, 13.8, 11.8.

HRMS (ESI) *m/z* calcd. for C28H33NNaO3 [M + Na]+: 454.2353, found: 454.2351.

**7.2.3 Late stage functionalization of rosuvastatin derivative**

According to the general procedure **5.2**. In a glove box, NiBr2 (8.7 mg, 0.04 mmol, 0.08 eq.) and DMF (2.5 mL) were added to a 10-mL Schlenk tube with a stir bar. And then 4-bromobenzonitrile 1 (91 mg, 0.5 mmol, 1.0 eq.), *tert*-butyl ester of rosuvastatin (537.2 mg, 1.0 mmol, 2.0 eq.), DCyMA (175.8 mg, 0.9 mmol, 1.8 equiv) and a DMF solution of **Et-DABDP** (100 μL, 0.0025 M/L, 2.5 × 10-4 mmol, 5 × 10-4 eq) were added to the reaction mixture successively. The reaction was then heated to 60 ℃ and irradiated on white LEDs (2 w, at approximately 1 cm away from the light source) for 24 h. After work-up, the residue was analyzed by Shimadzu LC-20AD instrument and purified by normal phase preparative chromatography (Agilent 1260 Infinity, Chiral INC 5μ, n-hexane/isopropanol 80:20 (v/v)) to give the desired compound.


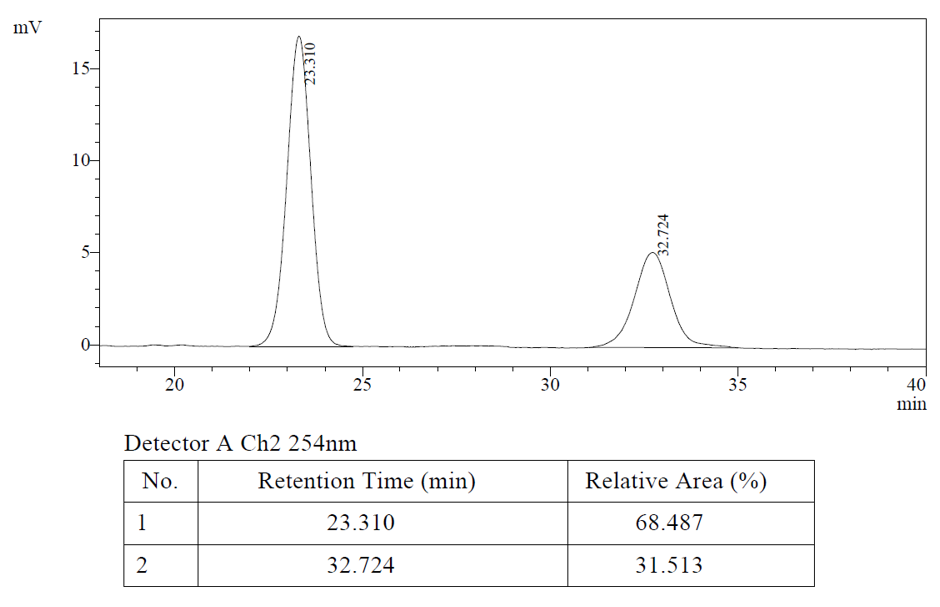


**75-*C3*:75-*C5*** = 1:2.2, HPLC conditions: Lux 5u Cellulose column, n-hexane/isopropanol 80:20 (v/v); flow rate = 1 mL/min; UV detection at 254 nm; tR = 23.3 min (major), tR = 32.7 min (minor).

The title compound **75-*C3*** was obtained as colorless oil (86 mg, 27% yield).

[α]20D = - 58.9° (c = 0.54, CHCl3).

1H NMR (600 MHz, CDCl3): δ 7.57 (d, *J* = 8.6 Hz, 2H), 7.53-7.51 (m, 2H), 7.00 (t, *J* = 8.4 Hz, 2H), 6.94 (d, *J* = 8.5 Hz, 2H), 6.66 (d, *J* = 16.3 Hz, 1H), 5.46 (dd, *J* = 16.3, 6.5 Hz, 1H), 5.08 (q, *J* = 6.5 Hz, 1H), 3.75 (s, 1H), 3.54 (s, 3H), 3.49 (s, 3H), 3.43 (s, 1H), 3.05-3.01 (m, 1H), 2.34-2.33 (m, 2H), 2.03-1.98 (m, 1H), 1.62-1.58 (m, 1H), 1.47 (s, 9H), 1.25 (s, 1H), 1.22 (t, *J* = 7.1 Hz, 1H), 1.16-1.14 (m, 6H).

13C NMR (100 MHz, CDCl3): δ 174.9, 172.4, 163.9, 163.3 (d, *J* = 248.6 Hz), 161.0, 157.6, 135.5, 134.5 (d, *J* = 3.4 Hz), 134.0, 131.9 (d, *J* = 8.3 Hz), 126.9, 120.8, 119.1, 116.7, 115.3 (d, *J* = 21.5 Hz), 104.5, 82.0, 75.5, 64.7, 42.6, 42.0, 41.2, 33.2, 32.4, 28.2, 21.6, 21.5.

19F NMR (376 MHz, CDCl3): δ -111.00- -111.08 (m, 1F).

HRMS (ESI) *m/z* calcd. for C33H39FN4NaO6S [M + Na]+: 661.2467, found: 661.2467.

The title compound **75-*C5*** was obtained as a white solid (201 mg, 63% yield). The sturcture was determined by single-crystal X-ray diffraction measurement. Single crystals suitable for X-ray diffraction measurement was grown from a solution of **75-*C5*** in *n*-pentane/dichloromethane.

3220D = - 15.9° (c = 0.82, CHCl3).

m.p. 127-128 °C.

1H NMR (600 MHz, CDCl3): δ 7.61-7.56 (m, 4H), 7.04 (d, *J* = 7.1 Hz, 2H), 6.97 (d, *J* = 8.7 Hz, 2H), 6.57 (d, *J* = 16.0 Hz, 1H), 5.48 (dd, *J* = 16.1, 5.8 Hz, 1H), 4.89 (t, *J* = 6.1 Hz, 1H), 4.34 (d, *J* = 3.1 Hz, 1H), 3.56 (s, 3H), 3.50 (s, 3H), 3.30-3.26 (m, 1H), 2.70-2.58 (m, 2H), 2.27-2.25 (m, 1H), 1.96-1.91 (m, 1H), 1.77-1.73 (m, 1H), 1.40 (s, 9H), 1.23 (d, *J* = 6.6 Hz, 6H).

13C NMR (100 MHz, CDCl3): δ 174.9, 169.9, 163.7, 163.3 (d, *J* = 248.6 Hz), 160.8, 157.5, 139.1, 134.5 (d, *J* = 3.3 Hz), 134.3, 132.2 (d, *J* = 8.3 Hz), 123.9, 121.0, 119.1, 116.4, 115.2 (d, *J* = 21.5 Hz), 104.6, 81.7, 72.8, 69.5, 42.5, 40.9, 40.4, 33.2, 32.2, 28.1, 21.8, 21.7.

19F NMR (376 MHz, CDCl3): δ -111.17- -111.25 (m, 1F).

HRMS (ESI) *m/z* calcd. for C33H39FN4NaO6S [M + Na]+: 661.2467, found: 661.2467.

**7.2.4 Late stage functionalization of atorvastatin derivative**

According to the general procedure **5.2**. In a glove box, NiBr2 (8.7 mg, 0.04 mmol, 0.08 eq.) and DMF (2.5 mL) were added to a 10-mL Schlenk tube with a stir bar. And then 4-bromobenzonitrile **1** (91 mg, 0.5 mmol), *tert*-butyl ester of atorvastatin (614.8 mg, 1.0 mmol, 2.0 eq.), DCyMA (175.8 mg, 0.9 mmol, 1.8 equiv) and a DMF solution of **Et-DABDP** (100 μL, 0.0025 M/L, 2.5 × 10-4 mmol, 5 × 10-4 eq) were added to the reaction mixture successively. The reaction was then heated to 60 °C h and irradiated on white LEDs (2 w, at approximately 1 cm away from the light source) for 24. After work-up, the residue was analyzed by Shimadzu LC-20AD instrument and purified by normal phase preparative chromatography (Agilent 1260 Infinity, Chiral INC 5μ, n-hexane/isopropanol 85:15 (v/v)) to give the desired compound.


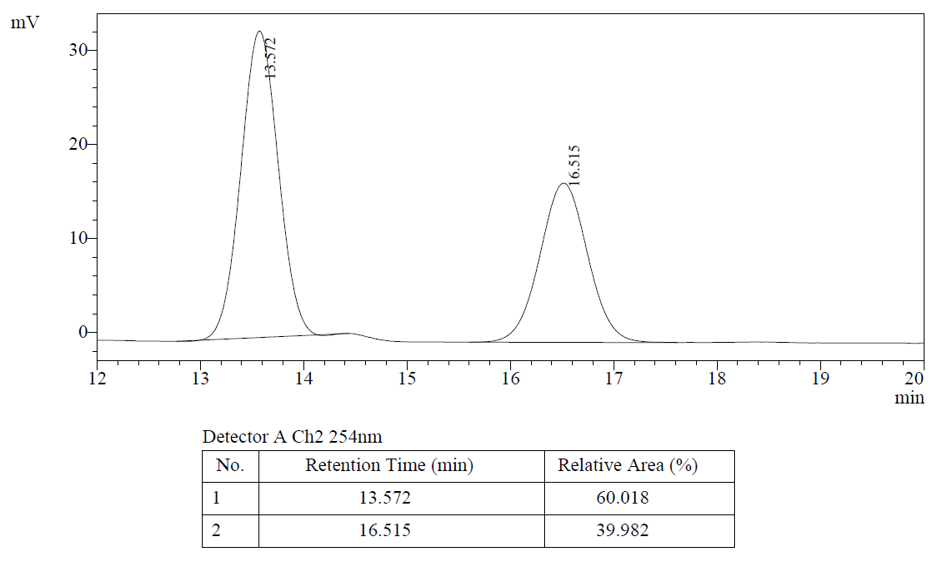


**76-*C3*:76-*C5*** = 1:1.5, HPLC conditions: Lux 5u Cellulose column, n-hexane/isopropanol 85:15 (v/v); flow rate = 1 mL/min; UV detection at 254 nm; tR = 13.6 min (major), tR = 16.5 min (minor).

The title compound **76-*C3*** was obtained as colorless oil (131 mg, 37% yield).

[α]20D = - 0.8° (c = 0.77, CHCl3).

1H NMR (600 MHz, CDCl3): δ 7.54 (d, *J* = 8.8 Hz, 2H), 7.21-7.13 (m, 9H), 7.06 (d, *J* = 7.7 Hz, 2H), 6.97 (q, *J* = 7.7 Hz, 3H), 6.86 (d, *J* = 8.7 Hz, 3H), 4.52-4.49 (m, 1H), 4.12-4.07 (m, 1H), 4.00-3.95 (m, 1H), 3.81-3.80 (m, 1H), 3.59-3.54 (m, 1H), 3.42 (s, 1H), 2.28 (d, *J* = 6.1 Hz, 2H), 2.05-2.01 (m, 1H), 1.93-1.88 (m, 1H), 1.86-1.82 (m, 1H), 1.51 (d, *J* = 2.0 Hz, 3H), 1.50 (d, *J* = 2.0 Hz, 3H), 1.45 (s, 9H).

13C NMR (150 MHz, CDCl3): δ 172.1, 164.7, 162.4 (d, *J* = 246.9 Hz), 160.7, 141.5, 138.4, 134.5, 134.2, 133.2 (d, *J* = 7.8 Hz), 130.5, 128.9, 128.8, 128.5, 128.2 (d, *J* = 1.9 Hz), 126.8, 123.7, 122.1, 119.7, 119.2, 116.0, 115.7, 115.5 (d, *J* = 21.4 Hz), 104.2, 82.0, 72.6, 64.9, 42.2, 40.9, 38.9, 35.0, 28.2, 26.2, 21.9, 21.8.

19F NMR (376 MHz, CDCl3): δ -112.91- -112.99 (m, 1F).

HRMS (ESI) *m/z* calcd. for C44H46FN3NaO5 [M + Na]+: 738.3314, found: 738.3313.

The title compound **76-*C5*** was obtained as a white solid (209 mg, 58% yield).

[α]20D = - 1.6° (c = 0.88, CHCl3).

m.p. 90-91℃.

1H NMR (600 MHz, CDCl3): δ 7.57 (d, *J* = 8.8 Hz, 2H), 7.19-7.13 (m, 9H), 7.06-7.05 (m, 2H), 7.00-6.93 (m, 5H), 6.85 (s, 1H), 4.84-4.80 (m, 1H), 4.14-4.09 (m, 1H), 3.95-3.90 (m, 1H), 3.62-3.61 (m, 1H), 3.57-3.53 (m, 1H), 2.65-2.62 (m, 1H), 2.51-2.47 (m, 1H), 2.23-2.22 (m, 1H), 1.88-1.83 (m, 1H), 1.70-1.67 (m, 2H), 1.63-1.59 (m, 1H), 1.52-1.51 (m, 6H), 1.40 (s, 9H).

13C NMR (100 MHz, CDCl3): δ 170.0, 164.8, 162.3 (d, *J* = 246.6 Hz), 160.5, 141.5, 138.4, 134.6, 134.3, 133.2 (d, *J* = 8.0 Hz), 130. 6, 128.8, 128.5, 128.4 (d, *J* = 3.4 Hz), 126.8, 123.7, 122.1, 119.7, 119.1, 116.4, 115.6 (d, *J* = 21.4 Hz), 115.5, 104.8, 81.9, 77.4, 73.1, 66.9, 41.6, 41.4, 40.3, 39.1, 28.1, 26.3, 21.9, 21.8.

19F NMR (376 MHz, CDCl3): δ -113.05--113.13 (m, 1F).

HRMS (ESI) *m/z* calcd. for C44H46FN3NaO5 [M + Na]+: 738.3314, found: 738.3313.

**7.2.5 Late stage functionalization of fingolimod**

According to the general procedure **5.2**. In a glove box, NiBr2 (8.7 mg, 0.04 mmol, 0.08 eq.) and DMF (2.5 mL) were added to a 10-mL Schlenk tube with a stir bar. And then 4-bromobenzonitrile **1** (91 mg, 0.5 mmol, 1.0 eq.), fingolimod (307.5 mg, 1.0 mmol, 2.0 eq.), DCyMA (175.8 mg, 0.9 mmol, 1.8 eq.) and a DMF solution of **Et-DABDP** (100 μL, 0.0025 M/L, 2.5 × 10-4 mmol, 5 × 10-4 eq) were added to the reaction mixture successively. The reaction was then heated to 60 ℃ and irradiated on white LEDs (2 w, at approximately 1 cm away from the light source) for 12 h. After work-up, the residue was purified by silica gel chromatography DCM/MeOH (20:1) to give the desired compound **77** as colorless oil (186 mg, 91% yield).

1H NMR (600 MHz, CDCl3): δ 7.57 (d, *J* = 8.4 Hz, 2H), 7.08 (s, 4H), 6.95 (d, *J* = 8.4 Hz, 2H), 3.91 (s, 2H), 3.65-3.54 (m, 2H), 2.65 (t, *J* = 8.3 Hz, 2H), 2.55 (t, *J* = 7.6 Hz, 2H), 1.91-1.81 (m, 3H), 1.57-1.56 (m, 2H), 1.30-1.26 (m, 12H), 0.88 (t, *J* = 6.5 Hz, 3H).

13C NMR (150 MHz, CDCl3): δ 162.0, 140.9, 138.8, 134.1, 128.6, 128.2, 119.2, 115.4, 104.5, 71.8, 66.3, 55.6, 37.4, 35.6, 32.0, 31.7, 29.6, 29.5, 29.4, 29.3, 22.8, 14.2.

HRMS (APCI) *m/z* calcd. for C26H37N2O2 [M + H]+: 409.2850, found: 409.2850.

**7.2.6 Late stage functionalization of methylprednisolone**

According to the general procedure **5.2**. In a glove box, NiBr2 (8.7 mg, 0.04 mmol, 0.08 eq.) and DMF (2.5 mL) were added to a 10-mL Schlenk tube with a stir bar. And then 4-bromobenzonitrile **1** (91 mg, 0.5 mmol,1.0 eq), methylprednisolone (374.5, 1.0 mmol, 2.0 eq.), DCyMA (175.8 mg, 0.9 mmol, 1.8 equiv) and a DMF solution of **Et-DABDP** (100 μL, 0.0025 M/L, 2.5 × 10-4 mmol, 5 × 10-4 eq) were added to the reaction mixture successively. The reaction was then heated to 40 °C and irradiated on white LEDs (2 w, at approximately 1 cm away from the light source) for 12 h. After work-up, the residue was purified by silica gel chromatography DCM/MeOH (100:1) to give the desired compound **78** as a white solid (219 mg, 92% yield).

[α]20D = + 26.6° (c = 0.73, MeOH).

m.p. 220-221 ℃.

1H NMR (600 MHz, DMSO-*d*6): δ 7.76 (d, *J* = 8.8 Hz, 2H), 7.34 (d, *J* = 10.0 Hz, 1H), 7.03 (d, *J* = 8.8 Hz, 2H), 6.19 (dd, *J* = 10.0, 1.2 Hz, 1H), 5.83 (s, 1H), 5.55 (s, 1H), 5.38-5.35 (m, 1H), 4.88-4.85 (m, 1H), 4.66 (s, 1H), 4.31 (s, 1H), 2.67-2.62 (m, 1H), 2.15-2.09 (m, 1H), 2.06-2.03 (m, 1H), 1.95-1.93 (m, 1H) ,1.68-1.62 (m, 3H), 1.50-1.45 (m, 1H), 1.39 (s, 3H), 1.35-1.30 (m, 1H), 1.05 (d, *J* = 6.1 Hz, 3H), 0.87 (dd, *J* = 11.0, 2.4 Hz, 1H), 0.80 (s, 3H), 0.73 (q, *J* = 12.2 Hz, 1H).

13C NMR (150 MHz, DMSO-*d*6): δ 206.1, 185.1, 173.4, 161.6, 157.2, 134.0, 126.7, 119.0, 118.8, 115.6, 103.0, 88.7, 79.2, 71.1, 68.4, 55.8, 51.0, 46.8, 44.0, 42.8, 33.2, 32.4, 30.8, 23.5, 21.3, 17.6, 16.9.

HRMS (ESI) *m/z* calcd. for C29H33NNaO5 [M + Na]+: 498.2251, found: 498.2261.

**7.2.7 Late stage functionalization of cortisol**

According to the general procedure **5.2**. In a glove box, NiBr2 (8.7 mg, 0.04 mmol, 0.08 eq.) and DMF (2.5 mL) were added to a 10-mL Schlenk tube with a stir bar. And then 4-bromobenzonitrile **1** (91 mg, 0.5 mmol, 1.0 eq.), methylprednisolone (362.2 mg, 1.0 mmol, 2.0 eq.), DCyMA (175.8 mg, 0.9 mmol, 1.8 equiv) and a DMF solution of **Et-DABDP** (100 μL, 0.0025 M/L, 2.5 × 10-4 mmol, 5 × 10-4 eq) were added to the reaction mixture successively. The reaction was then heated to 40 ℃ and irradiated on white LEDs (2 w, at approximately 1 cm away from the light source) for 12 h. After work-up, the residue was purified by silica gel chromatography DCM/MeOH (100:1) to give the desired compound **79** as a white solid (220 mg, 95% yield).

[α]20D = + 30.8° (c = 0.59, MeOH).

m.p. 223-224 ℃.

1H NMR (400 MHz, DMSO-*d*6): δ 7.76 (d, *J* = 8.7 Hz, 2H), 7.02 (d, *J* = 8.8 Hz, 2H), 5.58-5.57 (m, 2H), 5.41-5.36 (m, 1H), 4.31-4.29 (m, 2H), 2.55 (s, 1H), 2.49-2.35 (m, 2H), 2.21-2.08 (m, 3H), 1.99-1.92 (m, 3H), 1.78-1.65 (m, 4H), 1.51-1.46 (m, 1H), 1.37 (s, 3H), 1.29-1.23 (m, 1H), 1.05-0.94 (m, 1H), 0.88 (d, *J* = 10.1 Hz, 1H), 0.78 (s, 3H). 13C NMR (150 MHz, DMSO-*d*6): δ 206.0, 198.0, 172.2, 161.6, 134.1, 103.0, 88.8, 71.1, 66.5, 55.5, 54.9, 51.6, 46.6, 34.1, 33.5, 33.2, 32.7, 31.4, 31.2, 23.4, 20.4, 17.0.

HRMS (APCI) *m/z* calcd. for C28H34NO5 [M + H]+: 464.2431, found: 464.2436.

# 8. Mechanistic investigations

**8.1 Evaluation of Et-DABDP-assisted oxidative addition**

**8.1.1 Et-DABDP-assisted oxidative addition**

To verify the key roles of light and Et-DABDP in the oxidative addition process, two control experiments were conducted in the Photo thermal parallel reactor starting from 1 h to 10 h. The first experiment was performed with Et-DABDP in the presence of white light. The remaining experiment was carried out with Et-DABDP in the absence of white light. The results show that Et-DABDP and light have an obvious effect on the oxidative addition of Ni(cod)2 to aryl bromide **4**.

**

**

**Figure S16.** The effect of light and **Et-DABDP** in oxidative addition step.

**Reaction conditions:** 1-bromo-4-methylbenzene (0.5 mmol, 1 eq.), Ni(cod)2 (0.3 mmol, 0.6 eq.), and Ni(cod)2 (83 mg, every 1 hour adding 8.3 mg), Et-DABDP (0.05 mol%), DMF (2 ml), THF (1 ml), white LED (2 w), rt, N2, 10 h. aGC yield.

**8.2 The possible mechanism of Et-DABDP -assisted oxidative addition**

To understand possible mechanism of Et-DABDP-assisted oxidative addition of nickel to aryl electrophiles, a radical clock experiment was conducted to verify whether radical intermediates involved or not in our coupling conditions. We examined the coupling of (*1R,2S*)-cyclohexane-1,2-diol with methyl 3-(allyloxy)-4-iodobenzoate (a radical probe) with our novel catalyst. Uncyclized coupling products **8** and **9** were obtained in this C–O bond-forming reaction in 48% and 15% yields, respectively. This observation suggested that radical mechanism was not likely involved in oxidative addition step.

**Reaction conditions:** (*1R,2S*)-cyclohexane-1,2-diol (0.2 mmol, 2 eq.), methyl 3-(allyloxy)-4-iodobenzoate (0.1 mmol, 1 eq.), NiBr2 (8 mol%), Et-DABDP (0.05 mol%), DCyMA (1.8 eq., 0.9 mmol), DMF (0.50 mL), white LED (2 w), 80 °C, N2, 36 h.

**8.3 Kinetic studies**

**8.3.1 Studying the order of reaction in arylation of alcohol**

The experiment was conducted in the Photo thermal parallel reactor according general procedure **5.1.** And the conversion and GC yield were recorded from 0.5 h to 24 h, respectively.





**Figure S17.** Order of reaction in arylation of alcohol.

**Reaction conditions**: **1** (0.1 mmol, 1.0 eq.), **2** (0.15 mmol, 1.5 eq.), NiBr2 (8.0 mol%), Et-DABDP (0.05 mol%), DCyMA (0.18 mmol, 1.8 eq.), Na2CO3 (0.02 mmol, 0.2 eq.), DMF (0.5 mL), white LEDs (2 w), 60 °C, N2. aGC yield.

**8.3.2 Comparing the differences of nickel sources in arylation of alcohol**

To understand the difference of Ni(II), Ni(0) or combination of Ni(II) and Ni(0) in the reaction, five experiments were run in the Photo thermal parallel reactor according to the general procedure **5.1**. GC yields of desired compound **3** were collected from 0.5 h to 24 h in the presence of 8 mol% NiBr2, 8 mol% Ni(cod)2 or combination of NiBr2 and Ni(cod)2 (ratio = 1:1, 8 mol%, 12 mol%, 16 mol% in total nickel source). The data suggested NiBr2 as single nickel source show the highest catalytic efficiency in arylation of alcohol (Fig. S18).





**Figure S18.** Comparing the differences of nickel sources in arylation of alcohol.

**Reaction conditions**: **1** (0.1 mmol, 1.0 eq.), **2** (0.15 mmol, 1.5 eq.), NiBr2 (8.0 mol%), Ni(cod)2 (8 mol%) or [NiBr2 + Ni(cod)2] (1:1, 8mol%, 12 mol%, 16 mol%), Et-DABDP (0.05 mol%), DCyMA (1.8 eq., 0.18 mmol), Na2CO3 (0.2 eq., 0.02 mmol), DMF (0.5 mL), white LEDs (2 w), 60 °C, N2. aGC yield.

**8.4 DCyMA as reducing agent to generate zerovalent nickel**

We concern whether DCyMA serves as a reducing reagent in reduction of NiBr2 to Ni0, or not. The related demethylation byproduct dicyclohexylamine (DCyA) was monitored and the yield was recorded by GC analysis. The GC yield of DCyA was around 6.3% (the amount of NiBr2 is 8%.) which indicated that DCyMA is responsible for generating active zerovalent nickel. Furthermore, we haven’t detected the formation of benzaldehyde which indicated benzyl alcohol was not responsible for the generation of Ni(0).


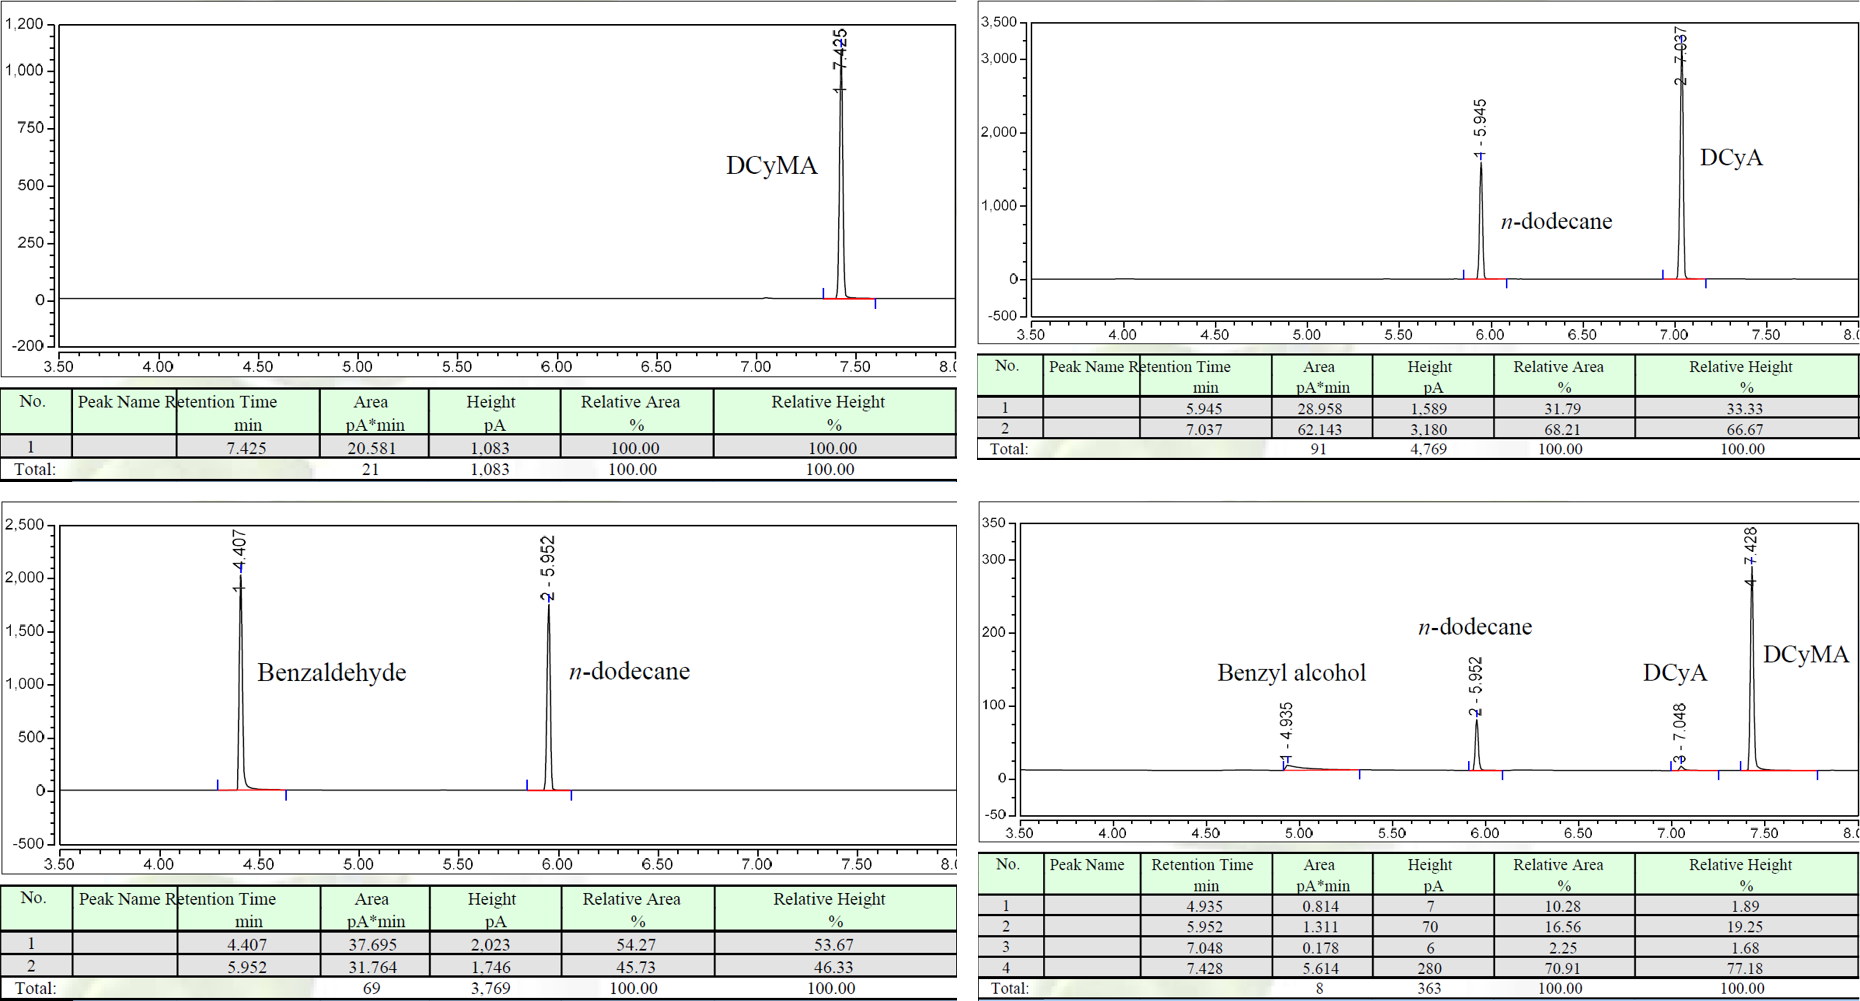


**Figure S19.** DCyMA as reducing agent to generate zerovalent nickel.

**Reaction conditions**: **1** (0.1 mmol, 1.0 eq.), **2** (0.15 mmol, 1.5 eq.), NiBr2 (8.0 mol%), Et-DABDP (0.05 mol%), DCyMA (0.18 mmol, 1.8 eq.), Na2CO3 (0.02 mmol, 0.2 eq.), DMF (0.5 mL), white LEDs (2 w), 60 °C, N2. aGC yield.

**8.5 Stern-Volmer Luminescence Quenching Analysis**

Emission intensities were recorded using a HITACHI F-7100 Fluorescence Spectrometer. All samples used in the luminescence quenching-based screening studies were prepared under oxygen-free conditions. The photosensitizer and potential quenchers were weighed into vials and placed inside a glove box under positive pressure of nitrogen. DMF and THF were degassed by nitrogen sparging for 30 min and then moved to the glove box. Stern-Volmer luminescence quenching studies were carried out using a 1 × 10-5 M solution of photosensitizer and variable concentrations of quencher 4-bromobenzonitrile, benzyl alcohol, DCyMA, NiBr2 was replaced by NiBr2·glyme for solubility reason, Ni(cod)2, 1,5-cod, Ni(PPh3)2(CO)2, PPh3 and TEMPO in dry DMF/THF (2:1) at room temperature under a nitrogen atmosphere. (I0 = emission intensity of the photocatalyst in isolation at the specified wavelength; I = observed intensity as a function of the quencher concentration).


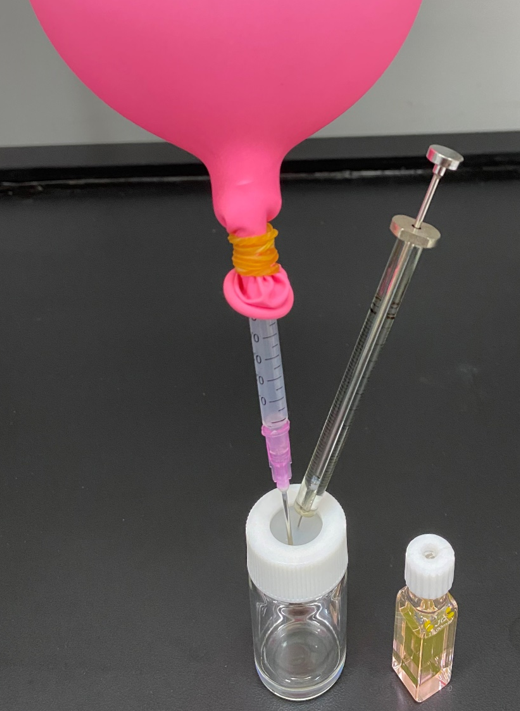


**Figure S20.** Fluorescence quenching device.

**8.5.1 The absorption and emission spectra of Et-DABDP**

**

**

**Figure S21.** The absorption and emission spectra of Et-DABDP.

**8.5.2 Emission quenching experiments for Et-DABDP**

The solutions were irradiated at 514 nm and the luminescence were measured at 559 nm. The ratio of each reaction component to Et-DABDP was calculated and shown in.

**Table S13. The ratio of each reaction component to Et-DABDP**

| Entry | Reaction partners | Ratio to Et-DABDP |
| --- | --- | --- |
| 1 | nickel | 160 |
| 2 | DCyMA | 3600 |
| 3 | 4-bromobenzonitrile | 2000 |
| 4 | Benzyl alcohol | 3000 |





**Figure S22.** Et-DABDP emission quenching by 4-bromobenzonitrile (1 M).





**Figure S23.** Et-DABDP emission quenching by benzyl alcohol (1 M).





**Figure S24.** Et-DABDP emission quenching by DCyMA (1 M).





**Figure S25.** Et-DABDP emission quenching by NiBr2·glyme (0.01 M).





**Figure S26.** Et-DABDP emission quenching by Ni(cod)2 (0.01 M).





**Figure S27.** Et-DABDP emission quenching by 1,5-COD (0.02 M).





**Figure S28.** Et-DABDP emission quenching by Ni(PPh3)2(CO)2 (0.01 M).





**Figure S29.** Et-DABDP emission quenching by PPh3 (0.02 M).





**Figure S30.** Et-DABDP emission quenching by TEMPO (1 M).

**8.6 Stern-Volmer Bimolecular Quenching Studies**

Stern-Volmer studies were prepared using varying concentration of a stock solution of the Ni(cod)2 quencher (0.01 M) and taking them to a final volume of 4 mL using a stock solution of Et-DABDP at a concentration of approximately 10 μM. All spectra were recorded in an anhydrous solution of DMF:THF (2:1) (1 × 10-5 M) in a 1 cm quartz cuvette. Time-resolved emission data were fit to a single exponential decay to obtain the lifetime. Where I0 or τ0 refer to integrated emission intensity in the absence of the quencher and I or τ refer to integrated emission intensity in the presence of the quencher.





**Figure S31.** Time-Resolved Stern-Volmer Experiment.





**Figure S32.** Combined Quenching experiment.

**8.7 UV-Vis Spectra Analysis**

UV-Vis absorption spectra were recorded on a TU-1950 recording spectrophotometer. All spectra were recorded in a 1 cm path quartz cuvette using an anhydrous solution of DMF:THF (2:1) (1 × 10-5 M) as a background solution.


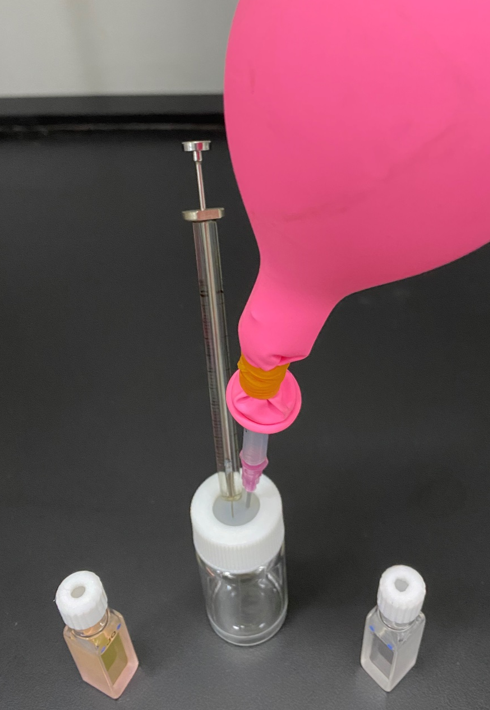


**Figure S33.** UV-Vis experimental device.





**Figure S34.** Combined Electronic Absorption Spectrum (UV-Vis) of Et-DABDP and Ni(cod)2.





**Figure S35.** Combined Electronic Absorption Spectrum (UV-Vis) of Et-DABDP and Ni(cod)2 at 0 min to 60 min.





**Figure S36.** Combined Electronic Absorption Spectrum (UV-Vis) of DCyMA and Ni(cod)2.





**Figure S37.** Combined Electronic Absorption Spectrum (UV-Vis) of a mixture of Et-DABDP/DCyMA (1:3600) and Ni(cod)2.





**Figure S38.** Combined Electronic Absorption Spectrum (UV-Vis) of a mixture of Et-DABDP/ Ni(cod)2 (1:40) and DCyMA.

# 9. Computational Details

**9.1 Methods**

The DFT calculations were performed with Gaussian16 package. The optimizations of those compounds were performed with functional B3LYP in combination of the basis set 6-311+G(d,p) in all the theoretical calculations presented in this article. The geometry optimization, vibration analysis, and NBO calculations were done in the gas phase. The vibrational frequencies were also computed to obtain thermal enthalpic and binding free energy at 298.15 K with the same level. All the stationary point structures have been subject to geometry optimization and then vibration analysis. Following, the single point energy calculations were performed using the M6 functional with 6-311+G (d, p) basis set. The label of the calculation systems was shown in the Figures S39-42. The optimized geometries for the ground state of photocatalyst and nickel were shown in the Figures S43-46. The calculated energy for those systems were listed in the Table S14.

**9.2 The label of photocatalyst and nickel**


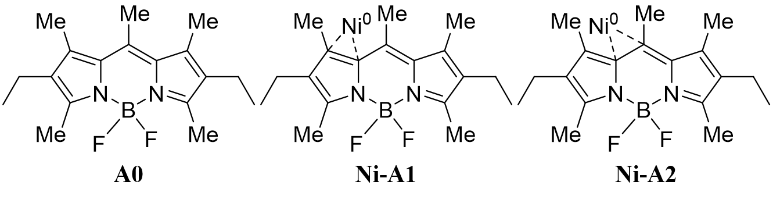


**Figure S39**. The label of Et-BDP system.


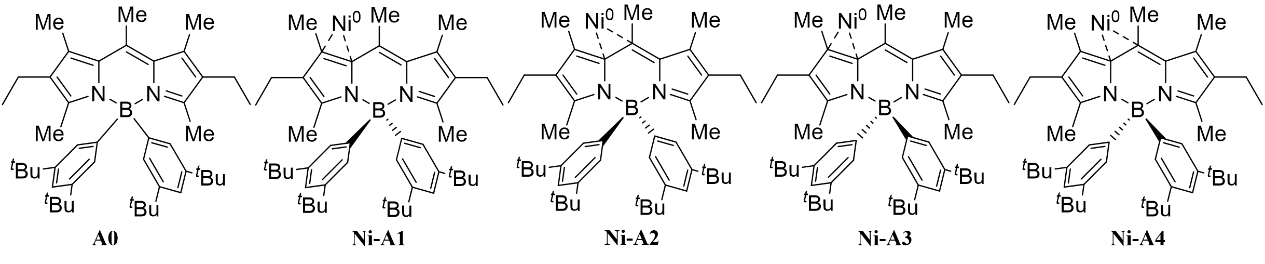


**Figure S40.** The label of Et-DABDP system.


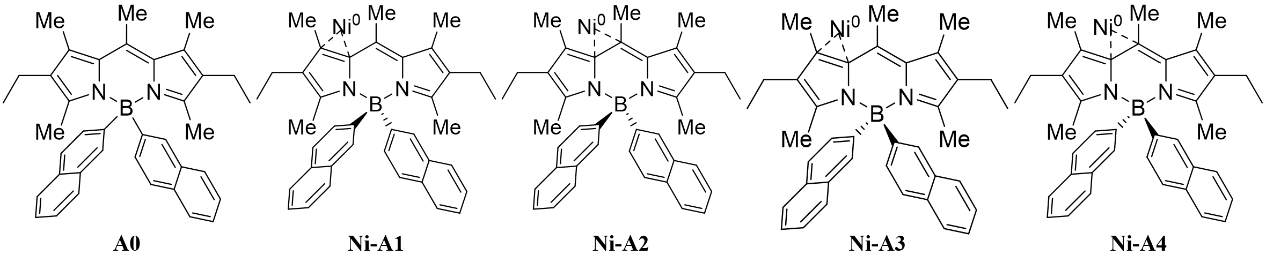


**Figure S41.** The label of Et-DABDP-Naph system.


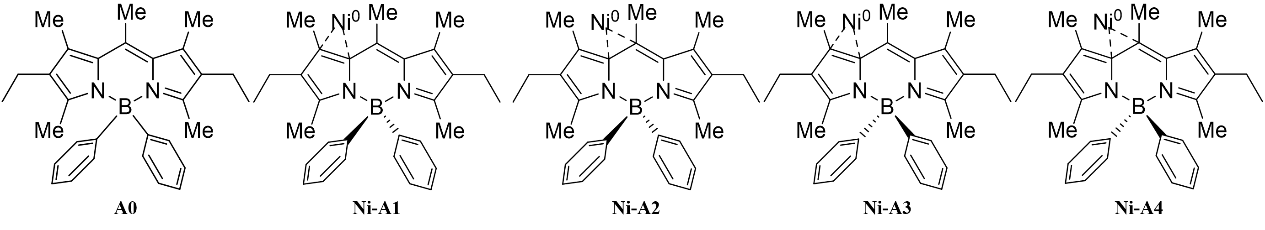


**Figure S42.** The label of Et-DABDP-Ph system.

**9.3 The optimized geometries for the ground state of photocatalyst and nickel**


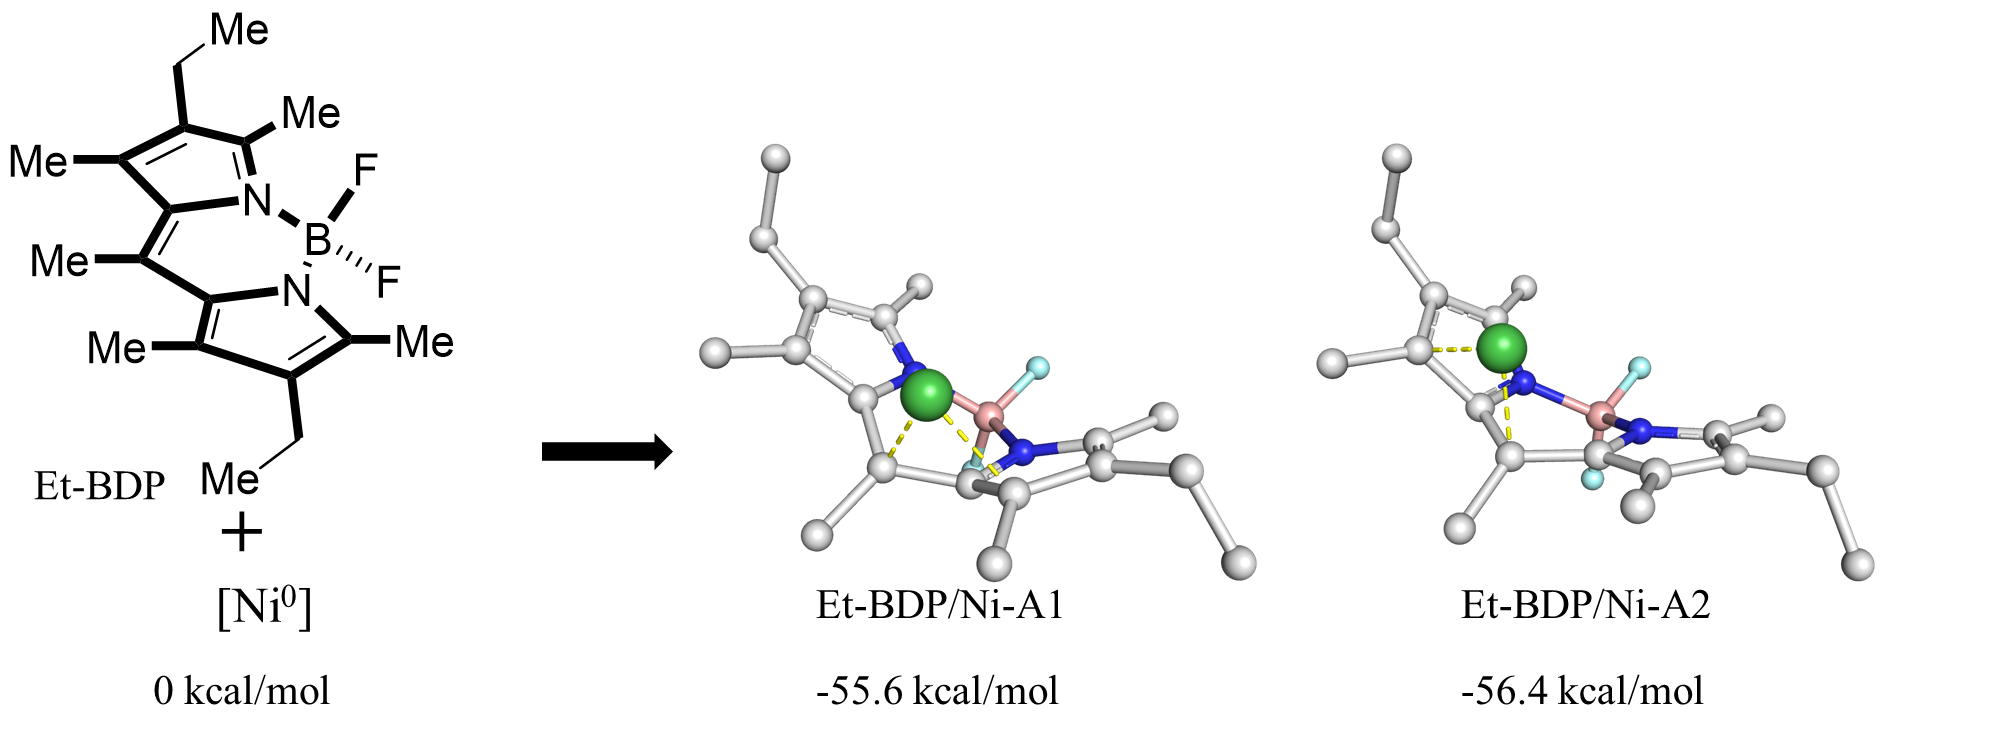


**Figure S43.** The optimized geometries for the ground state of Et-BDP and nickel.


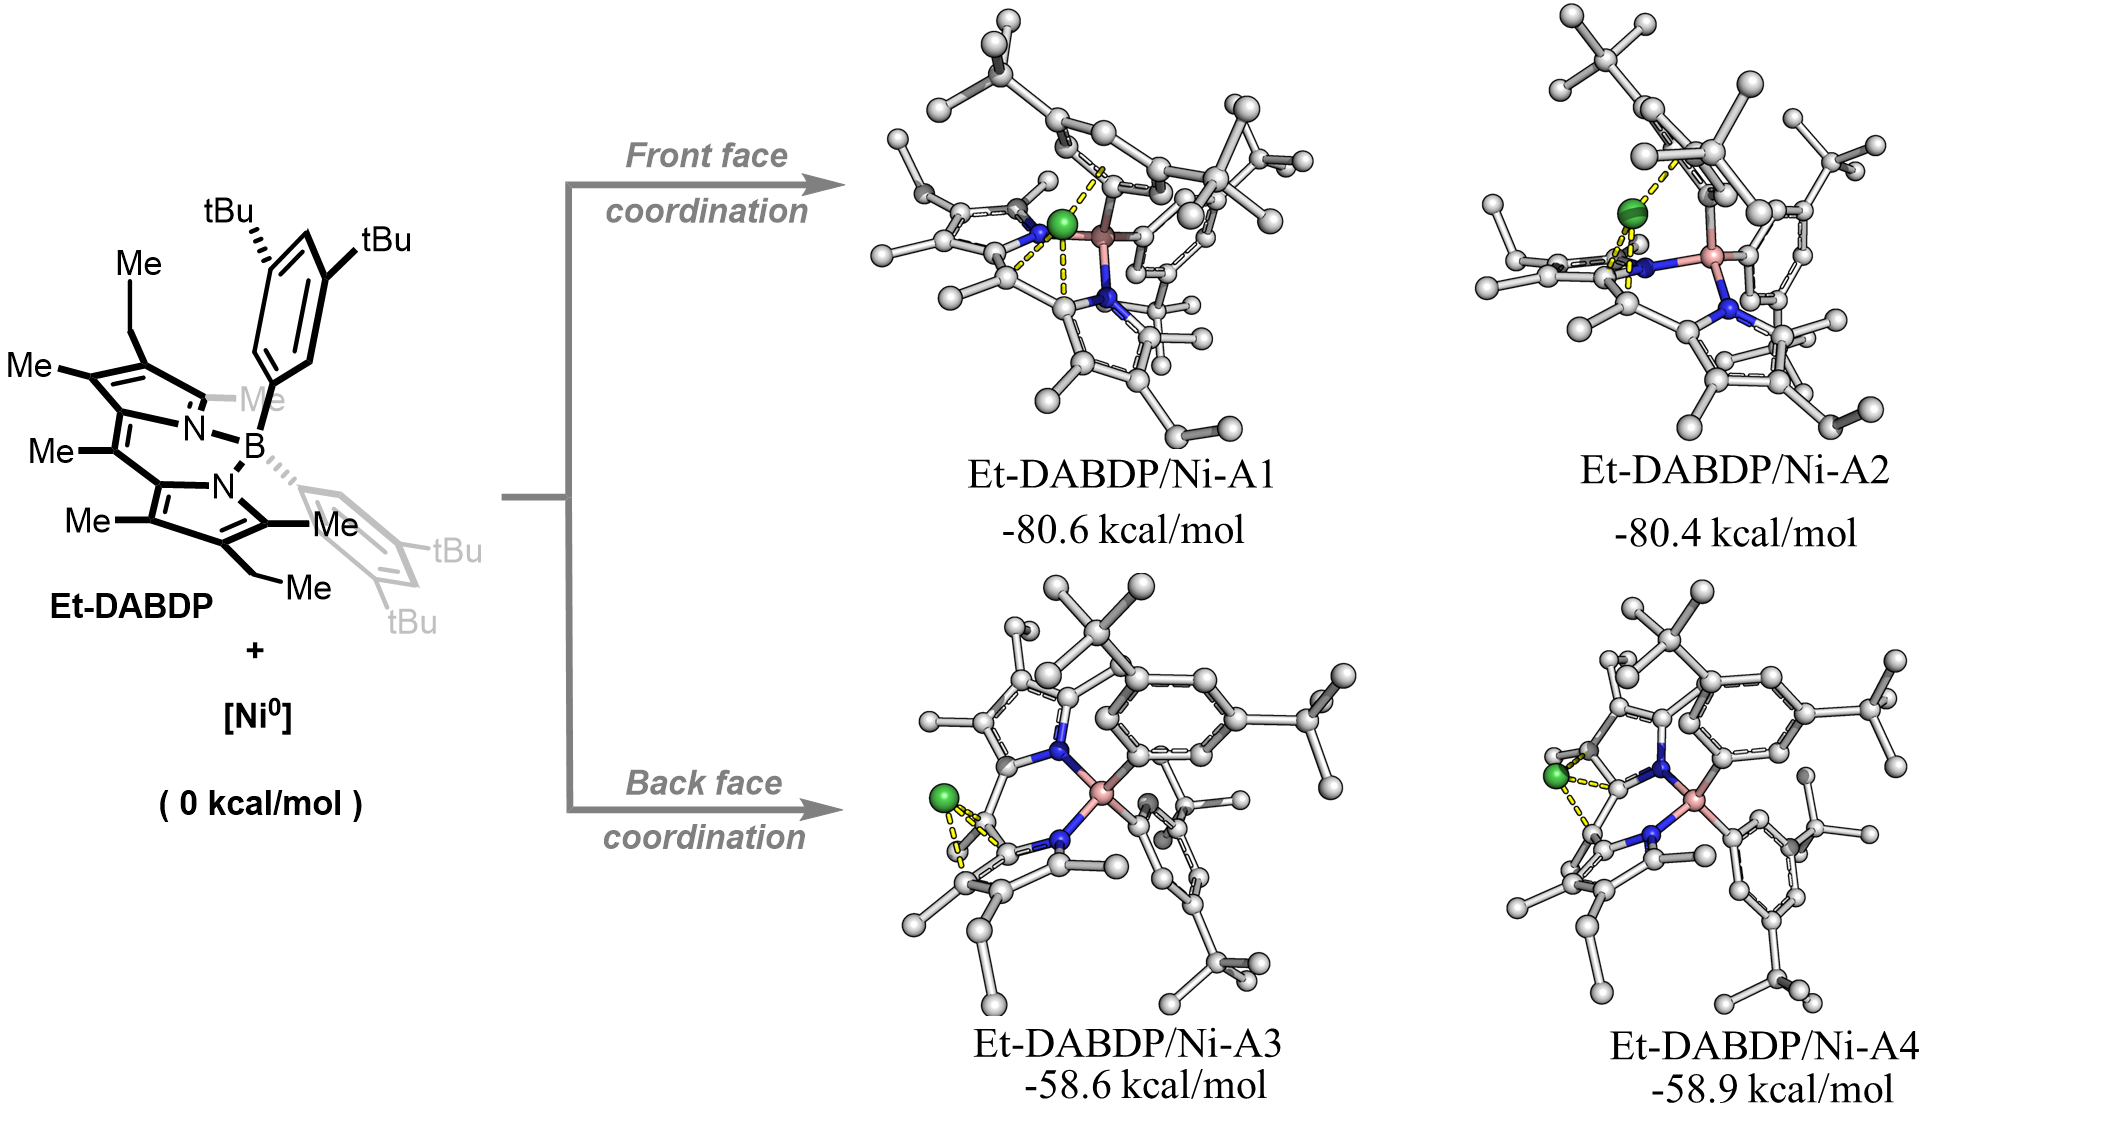


**Figure S44.** The optimized geometries for the ground state of Et-DABDP and nickel.


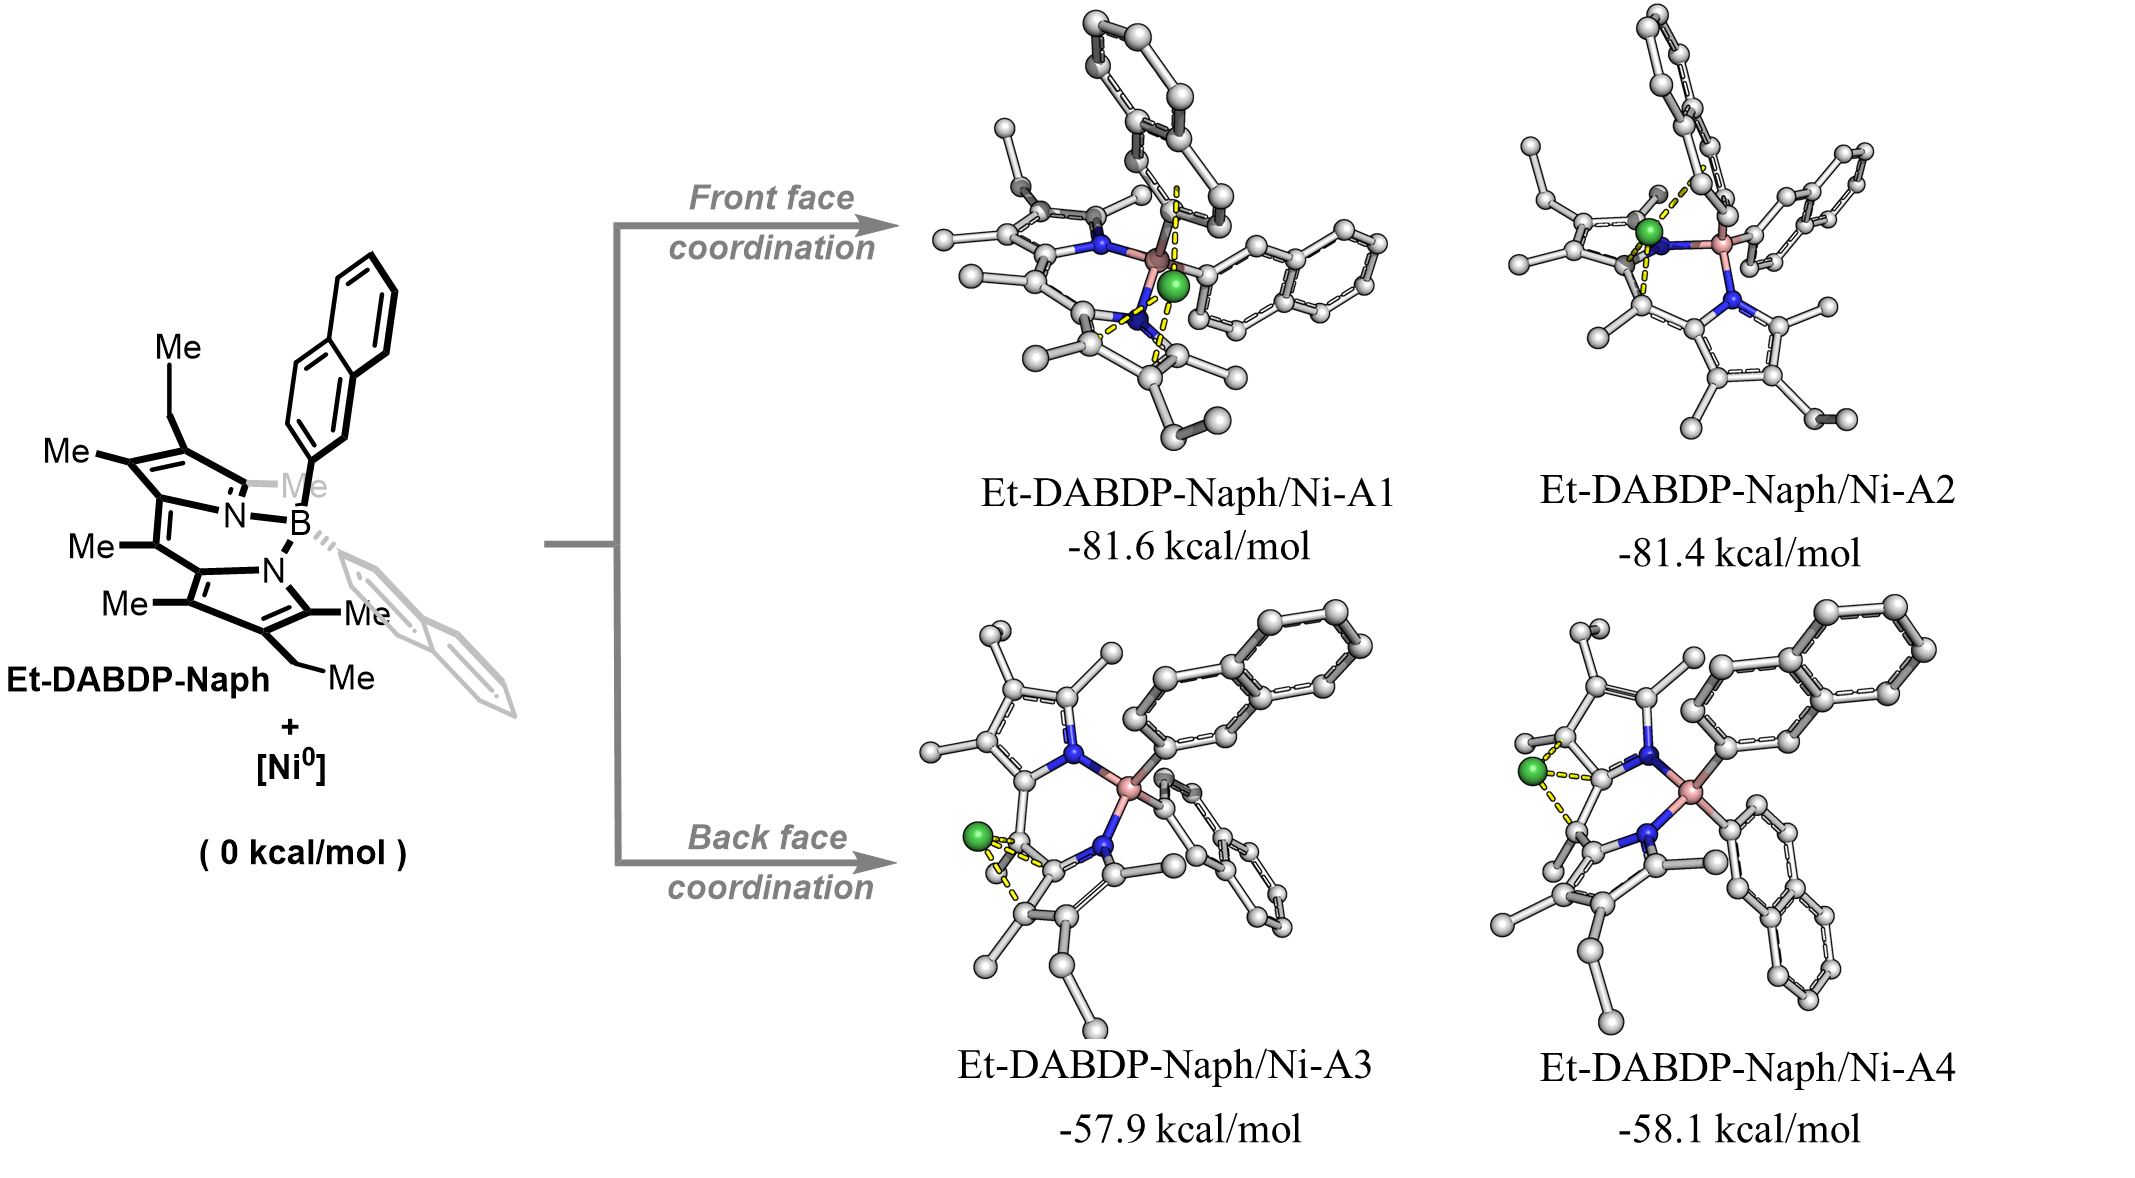


**Figure S45.** The optimized geometries for the ground state of Et-DABDP-Naph.


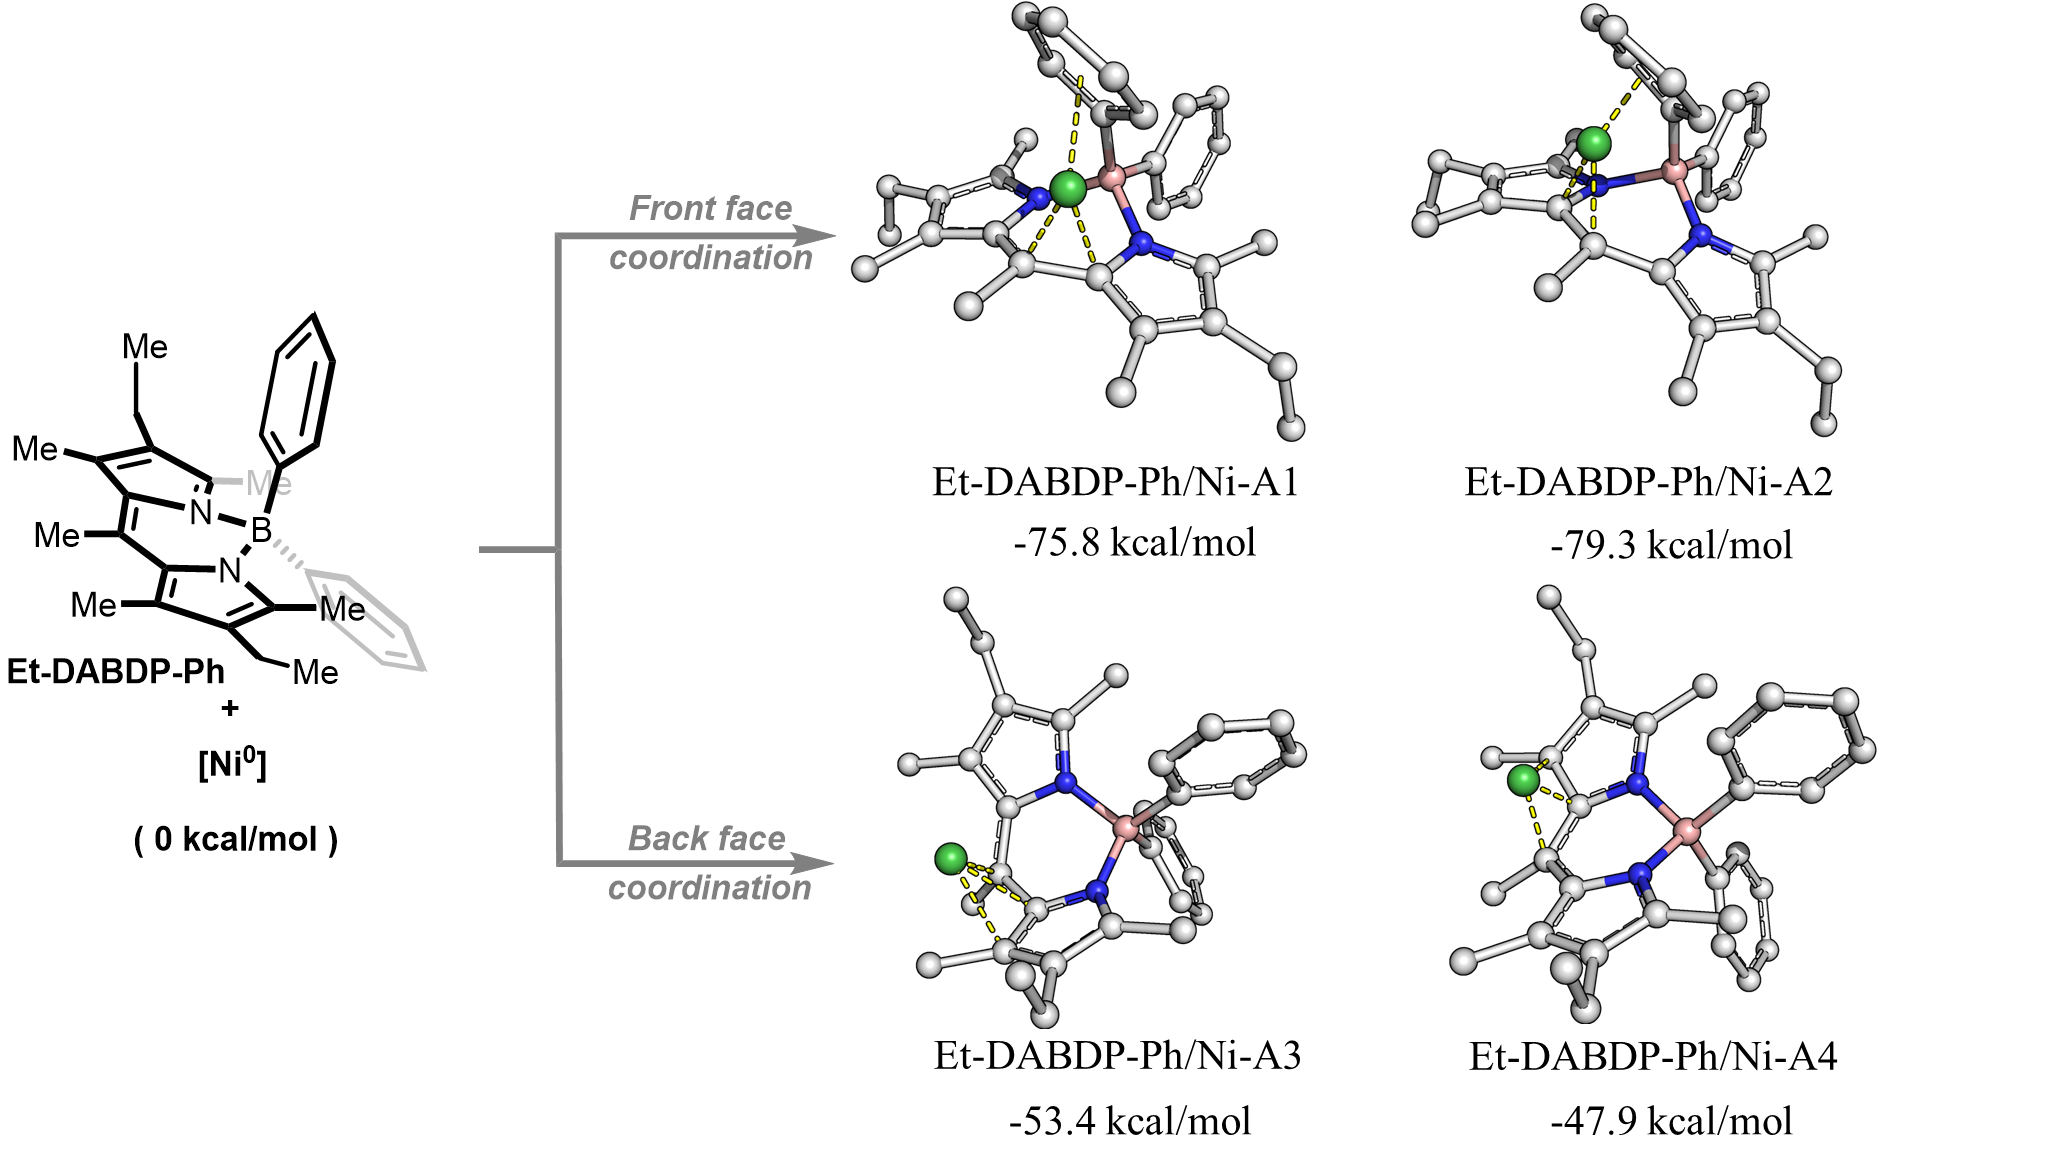


**Figure S46.** The optimized geometries for the ground state of Et-DABDP-Ph.

**Table S14. The calculated energy for the systems**

| Energy (kcal/mol) | **Et-BDP** | **Et-DABDP** | **Et-DABDP-Naph** | **Et-DABDP-Ph** |
| --- | --- | --- | --- | --- |
| Ni-A1 | -55.55 | -80.63 | -81.56 | -75.81 |
| Ni-A2 | -56.36 | -80.40 | -81.41 | -79.34 |
| Ni-A3 | NA | -58.55 | -57.90 | -53.44 |
| Ni-A4 | NA | -58.87 | -58.14 | -47.86 |

NA: No this conformation.

The energy was calculated with which the *E* with the sum of electronic and thermal free energies.

# 10. X-Ray Diffraction Analysis

**10.1 X-Ray Diffraction Analysis of compound Et-DABDP-Ph**

CCDC number: **CCDC 2098228**

The crystal was obtained from a mixed solution (*n*-pentane/diethyl ether) at room temperature.

| Identification code | s_pl |
| --- | --- |
| Empirical formula | C30H35BN2 |
| Formula weight | 434.41 |
| Temperature/K | 153.15 |
| Crystal system | orthorhombic |
| Space group | Pca21 |
| a/Å | 19.5752(7) |
| b/Å | 11.4919(4) |
| c/Å | 22.0397(8) |
| ° | 90 |
| ° | 90 |
| ° | 90 |
| Volume/Å3 | 4958.0(3) |
| Z | 8 |
| Density (calculated) g/cm3 | 1.164 |
| μ/ mm-1 | 0.501 |
| F(000) | 1872.0 |
| Crystal size/mm3 | 0.5 × 0.4 × 0.3 |
| Radiation | CuKλ |
| 2Θ range for data collection/° | 7.692 to 136.484 |
| Index ranges | -23 ≤ h ≤ 22, -13 ≤ k ≤ 13, -26 ≤ l ≤ 26 |
| Reflections collected | 172401 |
| Independent reflections | 9066 [Rint = 0.0513, Rsigma = 0.0155] |
| Data/restraints/parameters | 9066/1/610 |
| Goodness-of-fit on F2 | 1.043 |
| Final R indexes [I>=2σ (I)] | R1 = 0.0331, wR2 = 0.0841 |
| Final R indexes [all data] | R1 = 0.0356, wR2 = 0.0863 |
| Largest diff. peak/hole / e Å-3 | 0.21/-0.18 |
| Flack parameter | 0.5(4) |

**10.2 X-Ray Diffraction Analysis of compound Et-DABDP**

CCDC number: **CCDC 2098229**

The crystal was obtained from a mixed solution (*n*-pentane/diethyl ether) at room temperature.

| Identification code | s |
| --- | --- |
| Empirical formula | C46H67BN2 |
| Formula weight | 658.82 |
| Temperature/K | 153.0 |
| Crystal system | orthorhombic |
| Space group | Pbcn |
| a/Å | 35.459(4) |
| b/Å | 11.8152(14) |
| c/Å | 20.094(2) |
| ° | 90 |
| ° | 90 |
| ° | 90 |
| Volume/Å3 | 8418.4(17) |
| Z | 8 |
| Density (calculated) g/cm3 | 1.040 |
| μ/ mm-1 | 0.434 |
| F(000) | 2896.0 |
| Crystal size/mm3 | 0.5 × 0.4 × 0.3 |
| Radiation | CuKλ |
| 2Θ range for data collection/° | 9.034 to 136.968 |
| Index ranges | -42 ≤ h ≤ 42, -14 ≤ k ≤ 12, -24 ≤ l ≤ 24 |
| Reflections collected | 116543 |
| Independent reflections | 7709 [Rint = 0.0520, Rsigma = 0.0198] |
| Data/restraints/parameters | 7709/39/493 |
| Goodness-of-fit on F2 | 1.035 |
| Final R indexes [I>=2σ (I)] | R1 = 0.0542, wR2 = 0.1440 |
| Final R indexes [all data] | R1 = 0.0602, wR2 = 0.1502 |
| Largest diff. peak/hole / e Å-3 | 1.32/-0.19 |

**10.3 X-Ray Diffraction Analysis of compound 73-*C3***

CCDC number: **CCDC 2098221**

The crystal was obtained from a mixed solution (*n*-pentane/dichloromethane) at room temperature.

| Identification code | s |
| --- | --- |
| Empirical formula | C17H21NO6 |
| Formula weight | 335.35 |
| Temperature/K | 153.0 |
| Crystal system | orthorhombic |
| Space group | P212121 |
| a/Å | 5.5370(2) |
| b/Å | 13.7235(5) |
| c/Å | 21.9097(8) |
| ° | 90 |
| ° | 90 |
| ° | 90 |
| Volume/Å3 | 1664.85(10) |
| Z | 4 |
| Density (calculated) g/cm3 | 1.338 |
| μ/ mm-1 | 0.850 |
| F(000) | 712.0 |
| Crystal size/mm3 | 0.5 × 0.4 × 0.3 |
| Radiation | CuKλ |
| 2Θ range for data collection/° | 8.07 to 136.3 |
| Index ranges | -6 ≤ h ≤ 6, -16 ≤ k ≤ 16, -26 ≤ l ≤ 26 |
| Reflections collected | 22901 |
| Independent reflections | 3048 [Rint = 0.0302, Rsigma = 0.0169] |
| Data/restraints/parameters | 3048/0/221 |
| Goodness-of-fit on F2 | 1.085 |
| Final R indexes [I>=2σ (I)] | R1 = 0.0245, wR2 = 0.0633 |
| Final R indexes [all data] | R1 = 0.0252, wR2 = 0.0639 |
| Largest diff. peak/hole / e Å-3 | 0.15/-0.16 |
| Flack parameter | 0.07(4) |

**10.4 X-Ray Diffraction Analysis of compound 75-*C5***

CCDC number: **CCDC 2098343**

The crystal was obtained from a mixed solution (*n*-pentane/dichloromethane) at room temperature.

| Identification code | s |
| --- | --- |
| Empirical formula | C33H39FN4O6S |
| Formula weight | 638.74 |
| Temperature/K | 231.0 |
| Crystal system | triclinic |
| Space group | P1 |
| a/Å | 6.1301(8) |
| b/Å | 11.0266(16) |
| c/Å | 24.339(3) |
| ° | 90.650(6) |
| ° | 95.349(6) |
| ° | 90.385(6) |
| Volume/Å3 | 1637.8(4) |
| Z | 2 |
| Density (calculated) g/cm3 | 1.295 |
| μ/ mm-1 | 1.340 |
| F(000) | 676.0 |
| Crystal size/mm3 | 0.5 × 0.4 × 0.3 |
| Radiation | CuKλ |
| 2Θ range for data collection/° | 3.646 to 138.346 |
| Index ranges | -7 ≤ h ≤ 7, -13 ≤ k ≤ 13, -27 ≤ l ≤ 29 |
| Reflections collected | 40643 |
| Independent reflections | 11065 [Rint = 0.0645, Rsigma = 0.0582] |
| Data/restraints/parameters | 11065/3/827 |
| Goodness-of-fit on F2 | 1.053 |
| Final R indexes [I>=2σ (I)] | R1 = 0.0470, wR2 = 0.1131 |
| Final R indexes [all data] | R1 = 0.0621, wR2 = 0.1294 |
| Largest diff. peak/hole / e Å-3 | 0.31/-0.51 |
| Flack parameter | 0.059(10) |

# 11. References

1 Yang, L. *et al.* Synthesis of Phenols: Organophotoredox/Nickel Dual Catalytic Hydroxylation of Aryl Halides with Water. *Angew. Chem. Int. Ed.* **57**, 1968-1972, doi:<https://doi.org/10.1002/anie.201710698> (2018).

2 Goze, C. *et al.* Synthesis and Photophysical Properties of Borondipyrromethene Dyes Bearing Aryl Substituents at the Boron Center. *J. Am. Chem. Soc.* **128**, 10231-10239, doi:10.1021/ja062405a (2006).

3 Kasun, Z. A., Geary, L. M. & Krische, M. J. Ring expansion of cyclic 1,2-diols to form medium sized rings via ruthenium catalyzed transfer hydrogenative [4+2] cycloaddition. *Chem. Commun.* **50**, 7545-7547, doi:10.1039/C4CC03983A (2014).

4 Uzelac, M. *et al.* Tandem Mn–I Exchange and Homocoupling Processes Mediated by a Synergistically Operative Lithium Manganate. *Angew. Chem. Int. Ed.* **60**, 3247-3253, doi:<https://doi.org/10.1002/anie.202013153> (2021).

5 Wang, H. *et al.* Atomically Dispersed Ru on Manganese Oxide Catalyst Boosts Oxidative Cyanation. *ACS Catal.* **10**, 6299-6308, doi:10.1021/acscatal.0c00485 (2020).

6 Yeon, S. K. *et al.* Synthesis and evaluation of biaryl derivatives for structural characterization of selective monoamine oxidase B inhibitors toward Parkinson’s disease therapy. *Biorg. Med. Chem.* **26**, 232-244, doi:<https://doi.org/10.1016/j.bmc.2017.11.036> (2018).

7 Jagadeesh, R. V., Junge, H. & Beller, M. Green synthesis of nitriles using non-noble metal oxides-based nanocatalysts. *Nat. Commun.* **5**, 4123, doi:10.1038/ncomms5123 (2014).

8 Cheng, X. *et al.* Identification of 2-[4-[(4-Methoxyphenyl)methoxy]-phenyl]acetonitrile and Derivatives as Potent Oct3/4 Inducers. *J. Med. Chem.* **58**, 4976-4983, doi:10.1021/acs.jmedchem.5b00144 (2015).

9 Murugesan, K., Donabauer, K. & König, B. Visible-Light-Promoted Metal-Free Synthesis of (Hetero)Aromatic Nitriles from C(sp3)−H Bonds**. *Angew. Chem. Int. Ed.* **60**, 2439-2445, doi:<https://doi.org/10.1002/anie.202011815> (2021).

10 Liu, Y.-Y., Liang, D., Lu, L.-Q. & Xiao, W.-J. Practical heterogeneous photoredox/nickel dual catalysis for C–N and C–O coupling reactions. *Chem. Commun.* **55**, 4853-4856, doi:10.1039/C9CC00987F (2019).

11 Wang, D.-Y., Yang, Z.-K., Wang, C., Zhang, A. & Uchiyama, M. From Anilines to Aryl Ethers: A Facile, Efficient, and Versatile Synthetic Method Employing Mild Conditions. *Angew. Chem. Int. Ed.* **57**, 3641-3645, doi:<https://doi.org/10.1002/anie.201712618> (2018).

12 Rangarajan, T. M. *et al.* BrettPhos Ligand Supported Palladium-Catalyzed CO Bond Formation through an Electronic Pathway of Reductive Elimination: Fluoroalkoxylation of Activated Aryl Halides. *Chem. Eur. J.* **20**, 14218-14225, doi:<https://doi.org/10.1002/chem.201404121> (2014).

13 Yang, L. *et al.* Light-Promoted Nickel Catalysis: Etherification of Aryl Electrophiles with Alcohols Catalyzed by a NiII-Aryl Complex. *Angew. Chem. Int. Ed.* **59**, 12714-12719, doi:<https://doi.org/10.1002/anie.202003359> (2020).

14 Sarju, J., Danks, T. N. & Wagner, G. Rapid microwave-assisted synthesis of phenyl ethers under mildly basic and nonaqueous conditions. *Tetrahedron Lett.* **45**, 7675-7677, doi:<https://doi.org/10.1016/j.tetlet.2004.08.087> (2004).

15 Mao, R., Balon, J. & Hu, X. Decarboxylative C(sp3)−O Cross-Coupling. *Angew. Chem. Int. Ed.* **57**, 13624-13628, doi:<https://doi.org/10.1002/anie.201808024> (2018).

16 Szigeti, M., Dobi, Z. & Soós, T. The Goldilocks Principle in Phase Labeling. Minimalist and Orthogonal Phase Tagging for Chromatography-Free Mitsunobu Reaction. *J. Org. Chem.* **83**, 2869-2874, doi:10.1021/acs.joc.8b00014 (2018).

17 Ercole, F. *et al.* Macromolecular Hydrogen Sulfide Donors Trigger Spatiotemporally Confined Changes in Cell Signaling. *Biomacromolecules* **17**, 371-383, doi:10.1021/acs.biomac.5b01469 (2016).

18 Zheng, Y. *et al.* Ligand-free Cu-catalyzed O-arylation of aliphatic diols. *RSC Adv.* **5**, 66104-66108, doi:10.1039/C5RA12529D (2015).

19 Escobar, R. A. & Johannes, J. W. A Unified and Practical Method for Carbon–Heteroatom Cross-Coupling using Nickel/Photo Dual Catalysis. *Chem. Eur. J.* **26**, 5168-5173, doi:<https://doi.org/10.1002/chem.202000052> (2020).

20 Cavedon, C., Madani, A., Seeberger, P. H. & Pieber, B. Semiheterogeneous Dual Nickel/Photocatalytic (Thio)etherification Using Carbon Nitrides. *Org. Lett.* **21**, 5331-5334, doi:10.1021/acs.orglett.9b01957 (2019).

21 Lombardi, L. *et al.* Allylic and Allenylic Dearomatization of Indoles Promoted by Graphene Oxide by Covalent Grafting Activation Mode. *Chem. Eur. J.* **26**, 10427-10432, doi:<https://doi.org/10.1002/chem.202001373> (2020).

22 Sedano, C., Velasco, R., Feberero, C., Suárez-Pantiga, S. & Sanz, R. α-Lithiobenzyloxy as a Directed Metalation Group in ortho-Lithiation Reactions. *Org. Lett.* **22**, 6365-6369, doi:10.1021/acs.orglett.0c02199 (2020).

23 Li, J. *et al.* Photoredox catalysis with aryl sulfonium salts enables site-selective late-stage fluorination. *Nat. Chem.* **12**, 56-62, doi:10.1038/s41557-019-0353-3 (2020).

24 Radfar, I., Kazemi Miraki, M., Esfandiary, N., Ghandi, L. & Heydari, A. Fe3O4@SiO2-copper sucrose xanthate as a green nanocatalyst for N-, O- and S-arylation. *Appl. Organomet. Chem.* **33**, e4619, doi:<https://doi.org/10.1002/aoc.4619> (2019).

25 Chen, Z., Jiang, Y., Zhang, L., Guo, Y. & Ma, D. Oxalic Diamides and tert-Butoxide: Two Types of Ligands Enabling Practical Access to Alkyl Aryl Ethers via Cu-Catalyzed Coupling Reaction. *J. Am. Chem. Soc.* **141**, 3541-3549, doi:10.1021/jacs.8b12142 (2019).

26 Li, G. *et al.* Transition-metal-free formal cross-coupling of aryl methyl sulfoxides and alcohols via nucleophilic activation of C-S bond. *Nat. Commun.* **11**, 2890, doi:10.1038/s41467-020-16713-8 (2020).

27 Schwenninger, R. & Ongania, K. H. Synthesis of benzanellated carbacephams. II. *Monatsh. Chem.* **126**, 187-199 (1995).

28 Qin, Y., Martindale, B. C. M., Sun, R., Rieth, A. J. & Nocera, D. G. Solar-driven tandem photoredox nickel-catalysed cross-coupling using modified carbon nitride. *Chem. Sci.* **11**, 7456-7461, doi:10.1039/D0SC02131H (2020).

29 Bai, W.-J., Xie, J.-H., Li, Y.-L., Liu, S. & Zhou, Q.-L. Enantioselective Synthesis of Chiral β-Aryloxy Alcohols by Ruthenium-Catalyzed Ketone Hydrogenation via Dynamic Kinetic Resolution (DKR). *Adv. Synth. Catal.* **352**, 81-84, doi:<https://doi.org/10.1002/adsc.200900675> (2010).

30 Madivada, L. R. *et al.* An Improved Process for Pioglitazone and Its Pharmaceutically Acceptable Salt. *Org. Process Res. Dev.* **13**, 1190-1194, doi:10.1021/op900131m (2009).

31 Xiong, Y. *et al.* Regulating the piezofluorochromism of 9,10-bis(butoxystyryl)anthracenes by isomerization of butyl groups. *Chem. Commun.* **51**, 3403-3406, doi:10.1039/C4CC10196K (2015).

32 Li, C. *et al.* Decarboxylative borylation. *Science* **356**, eaam7355, doi:10.1126/science.aam7355 (2017).

# 12. NMR Spectra

**
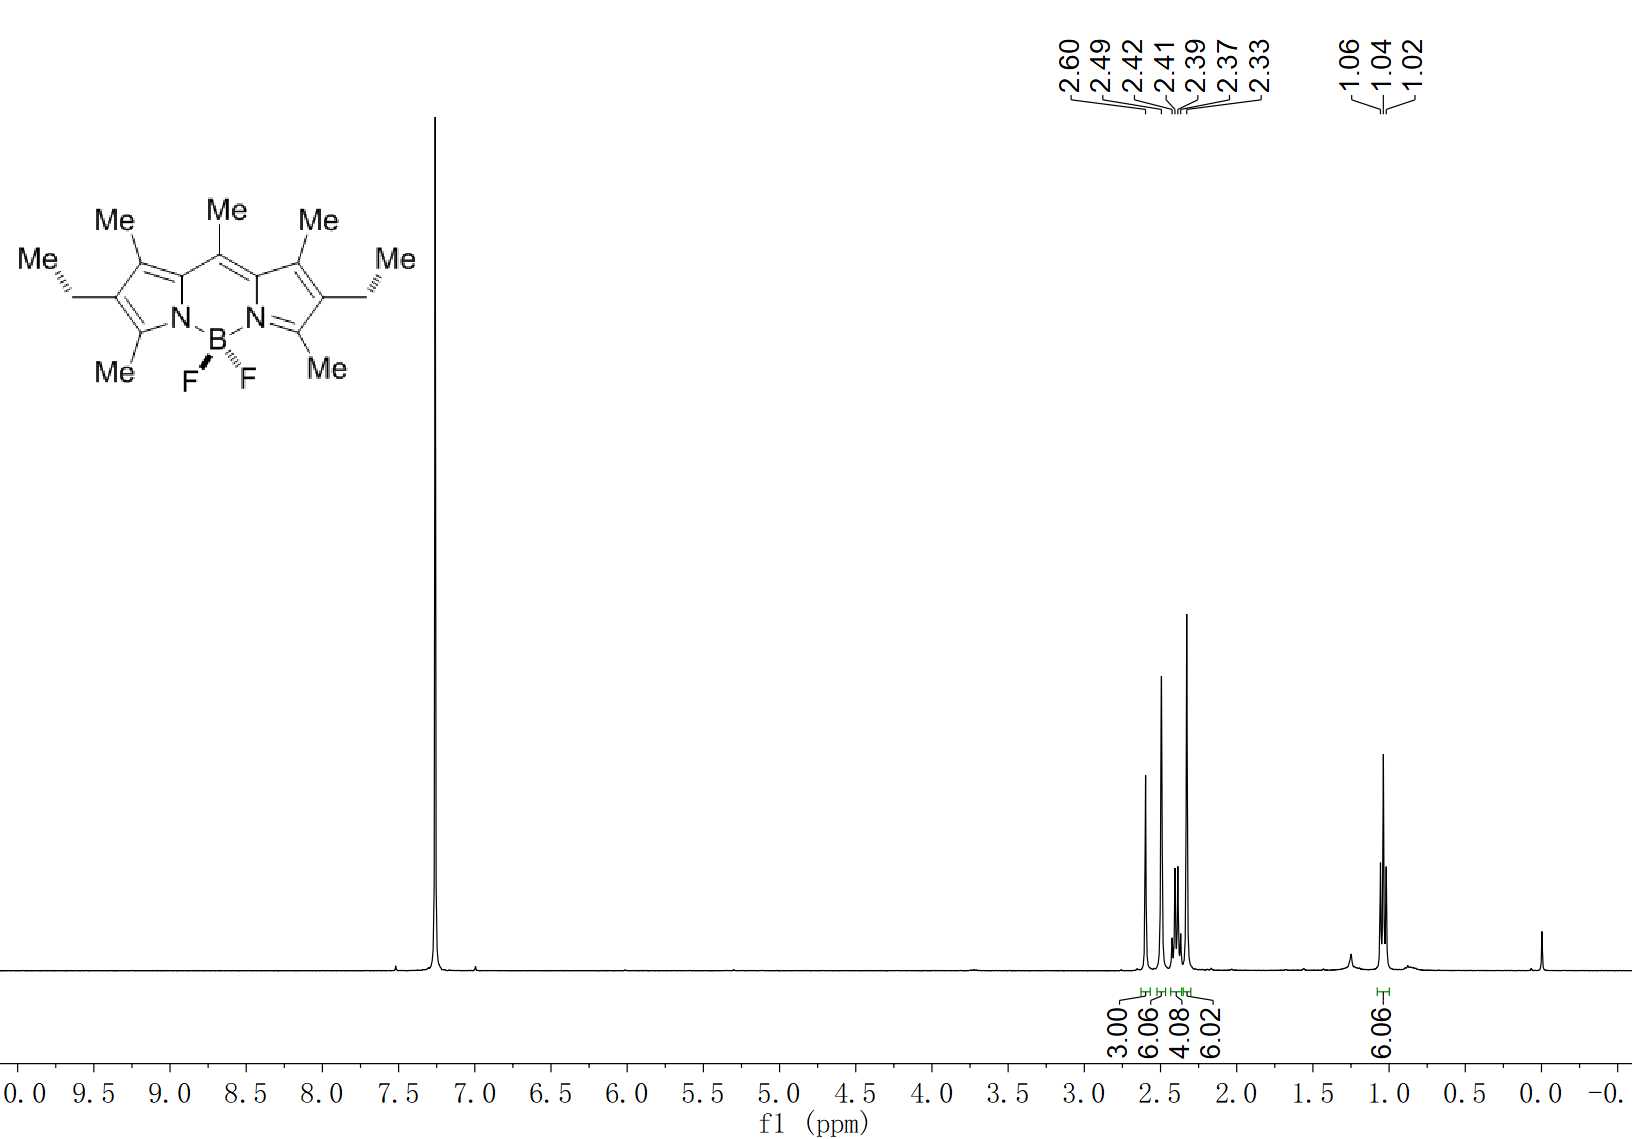
**

**Et-BDP** 1H NMR (400 MHz, CDCl3)


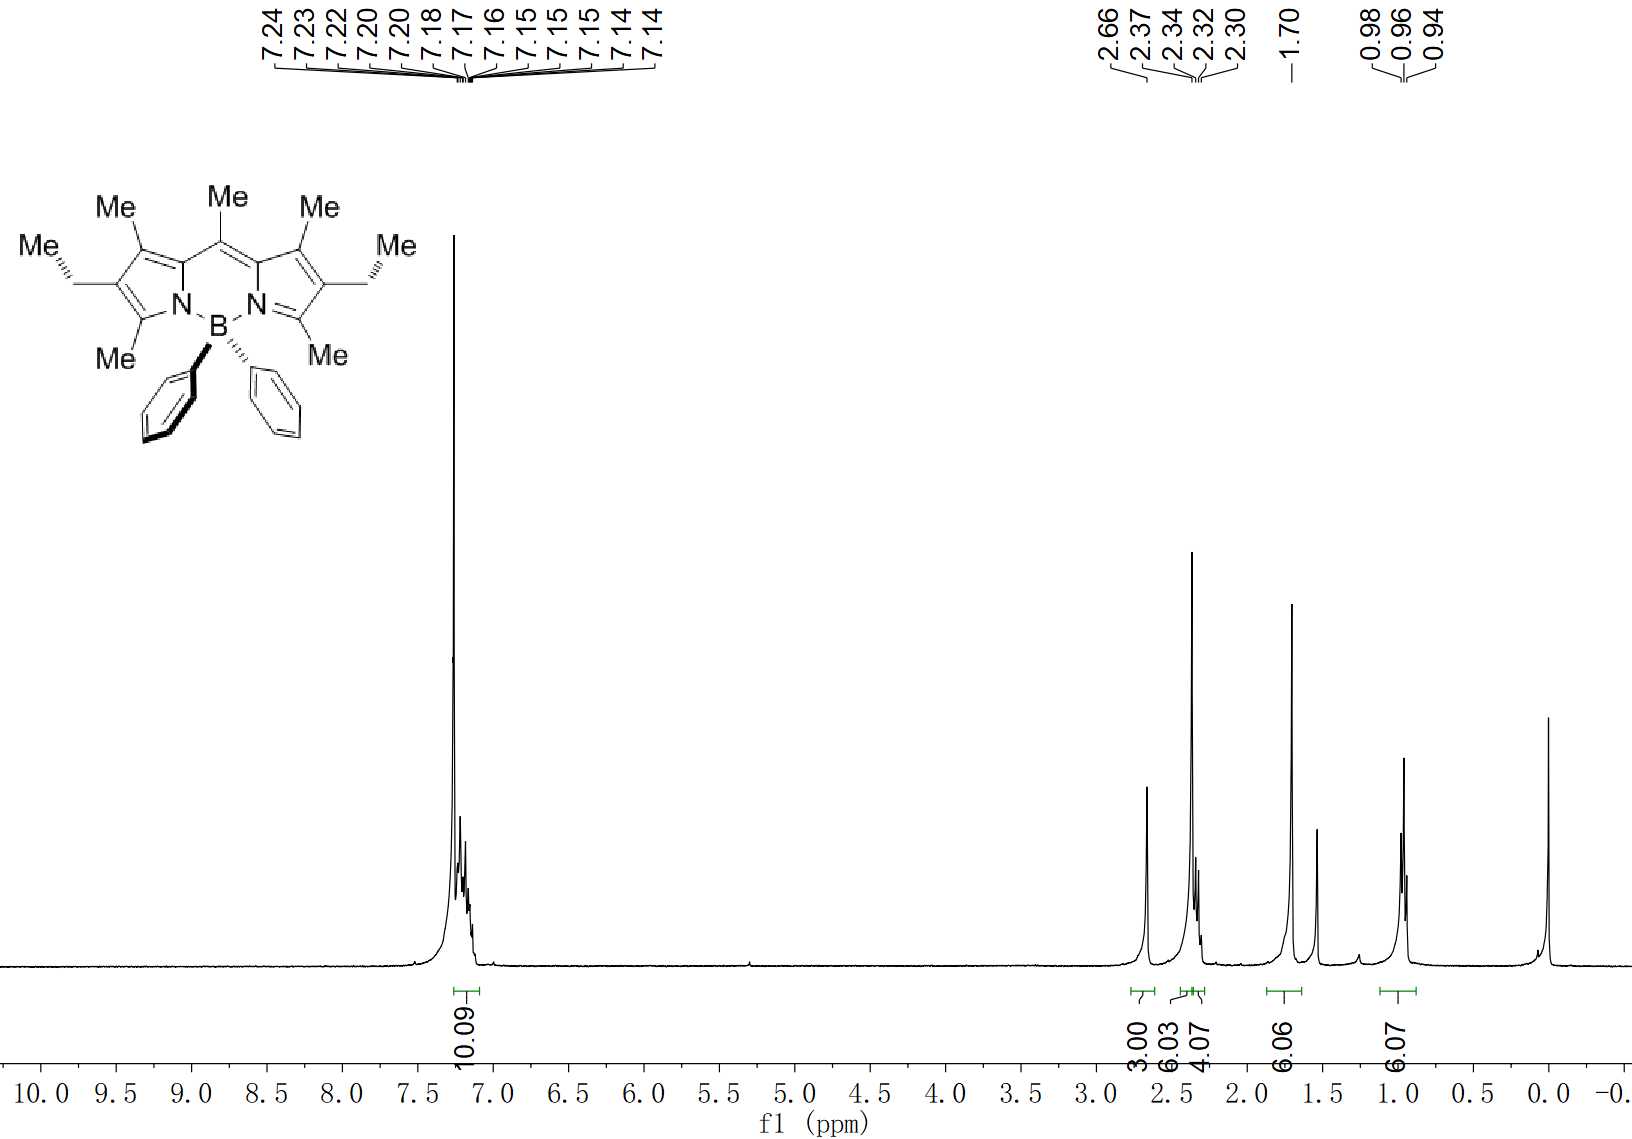


**Et-DABDP-Ph** 1H NMR (400 MHz, CDCl3)

**
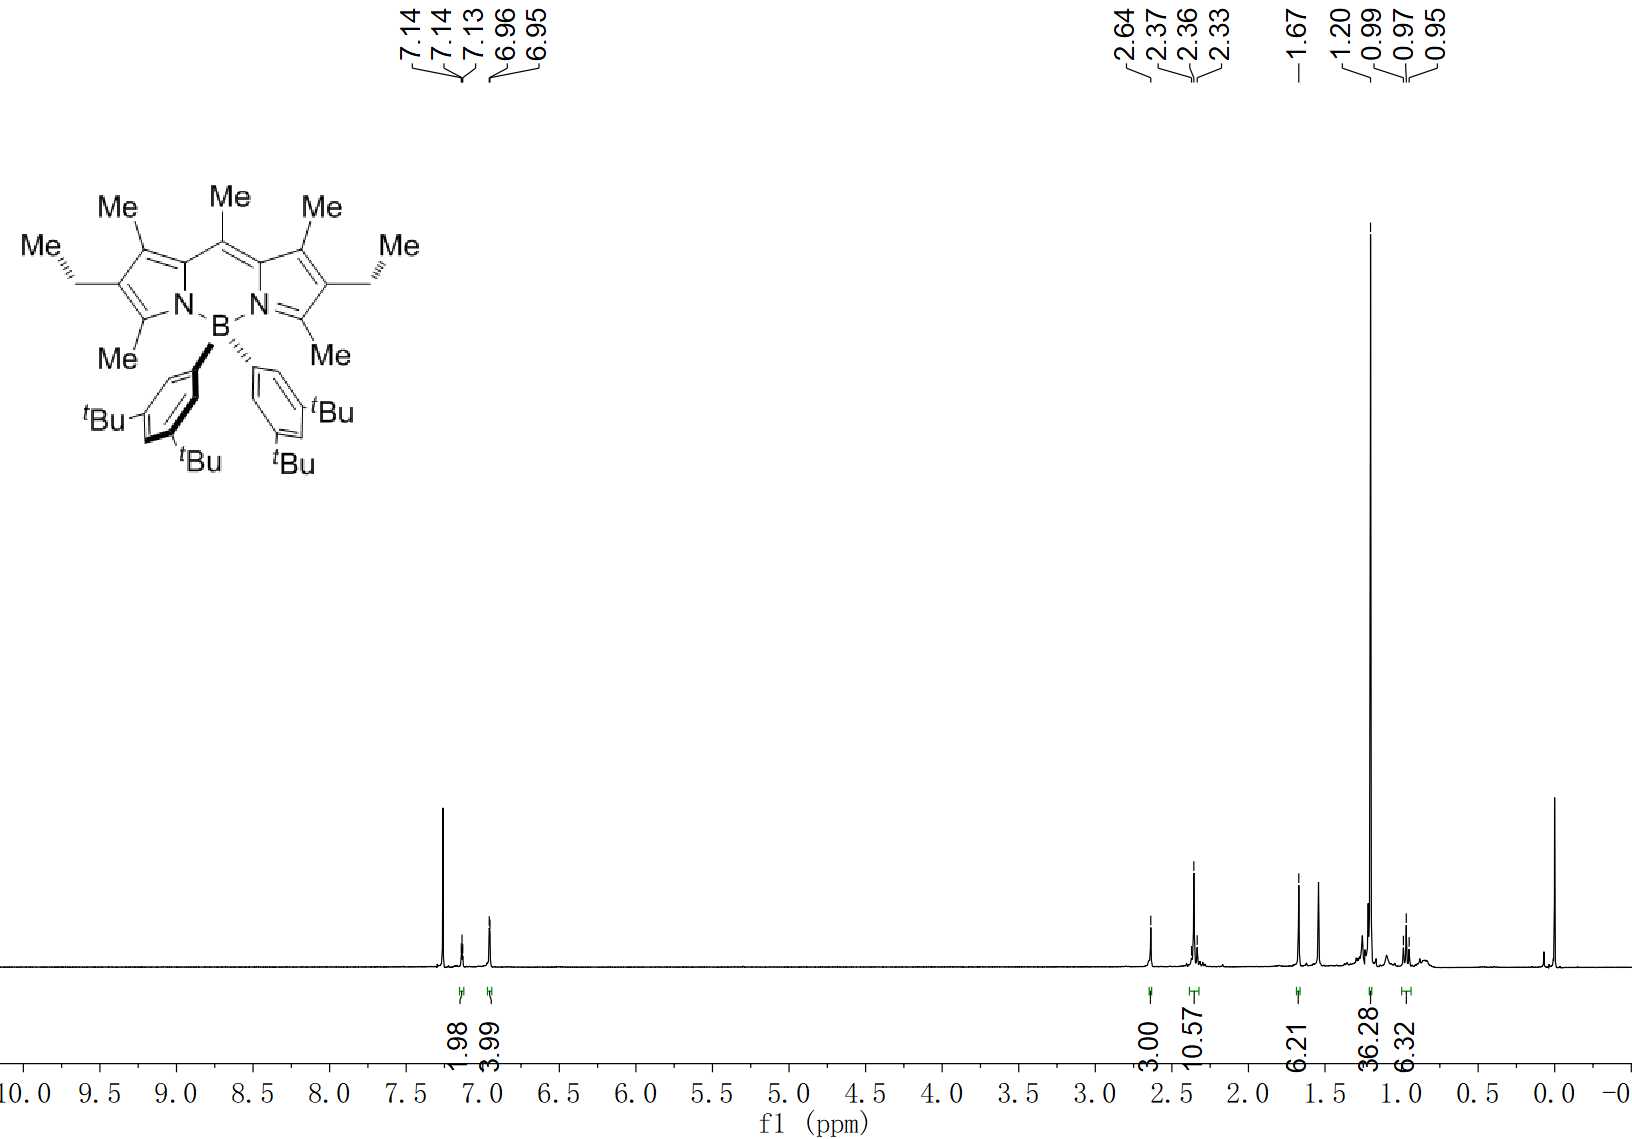
**

**Et-DABDP** 1H NMR (400 MHz, CDCl3)


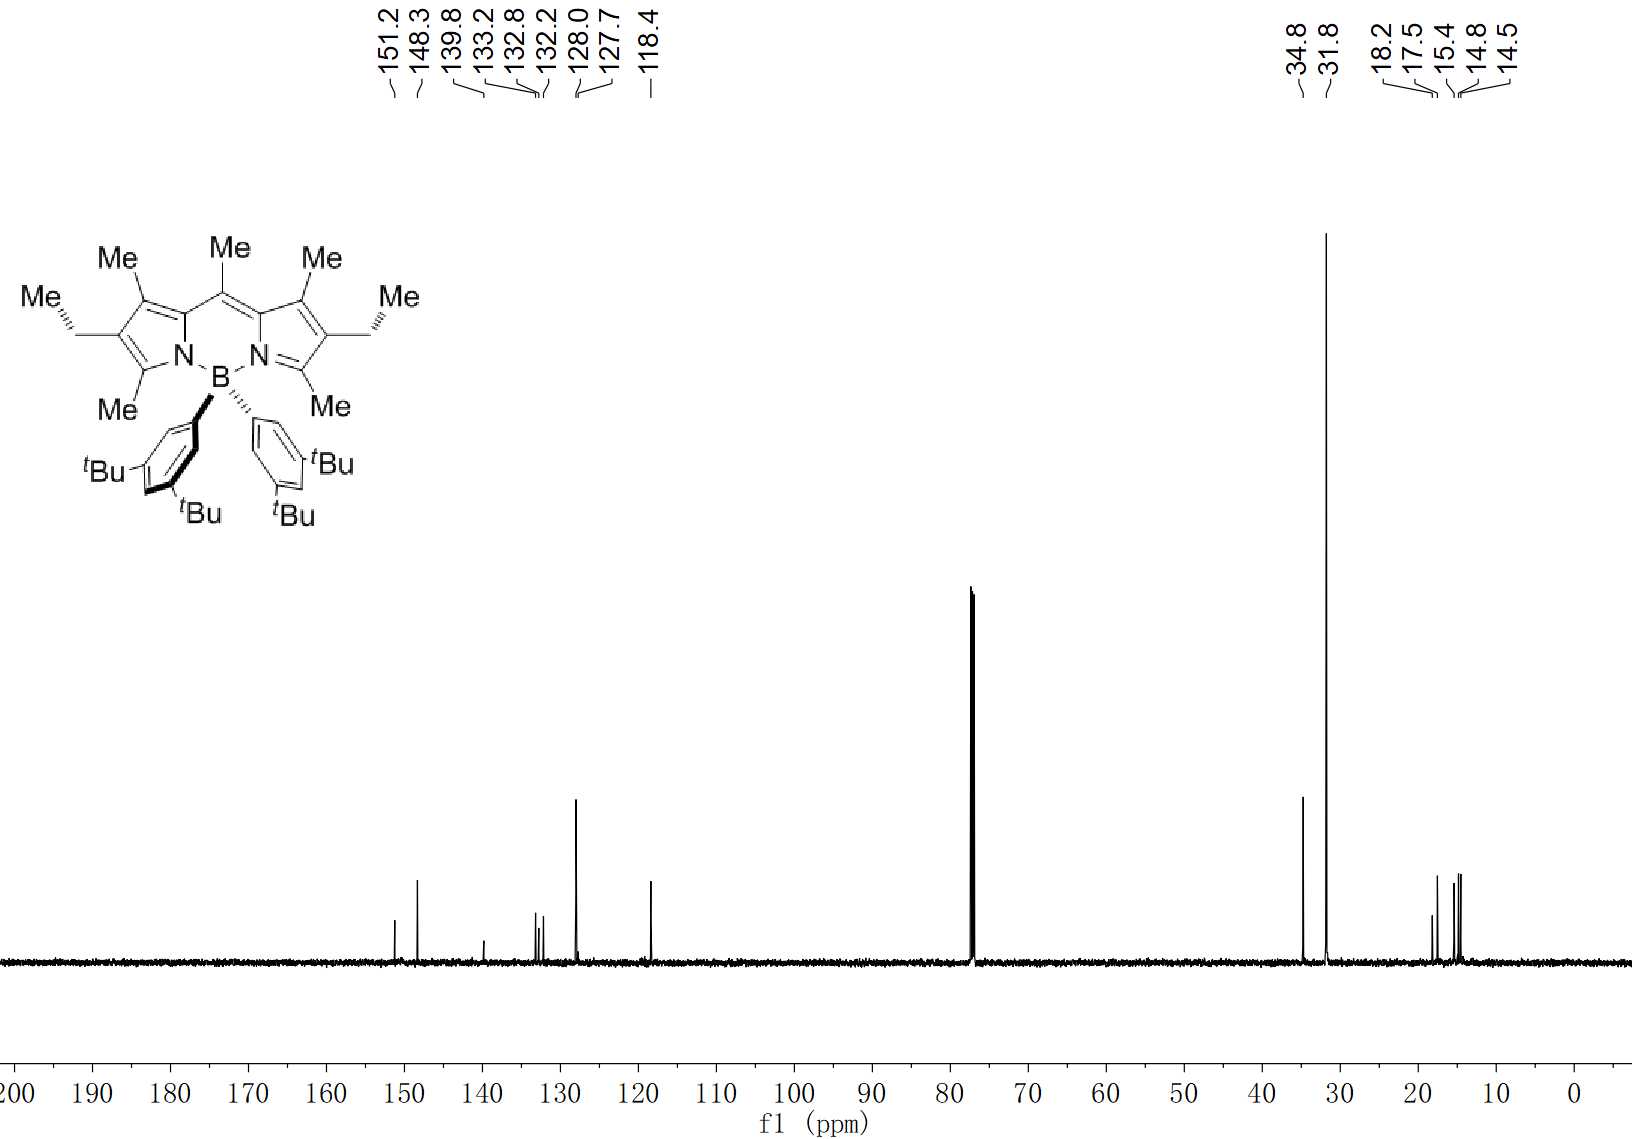


**Et-DABDP** 13C NMR (100 MHz, CDCl3)


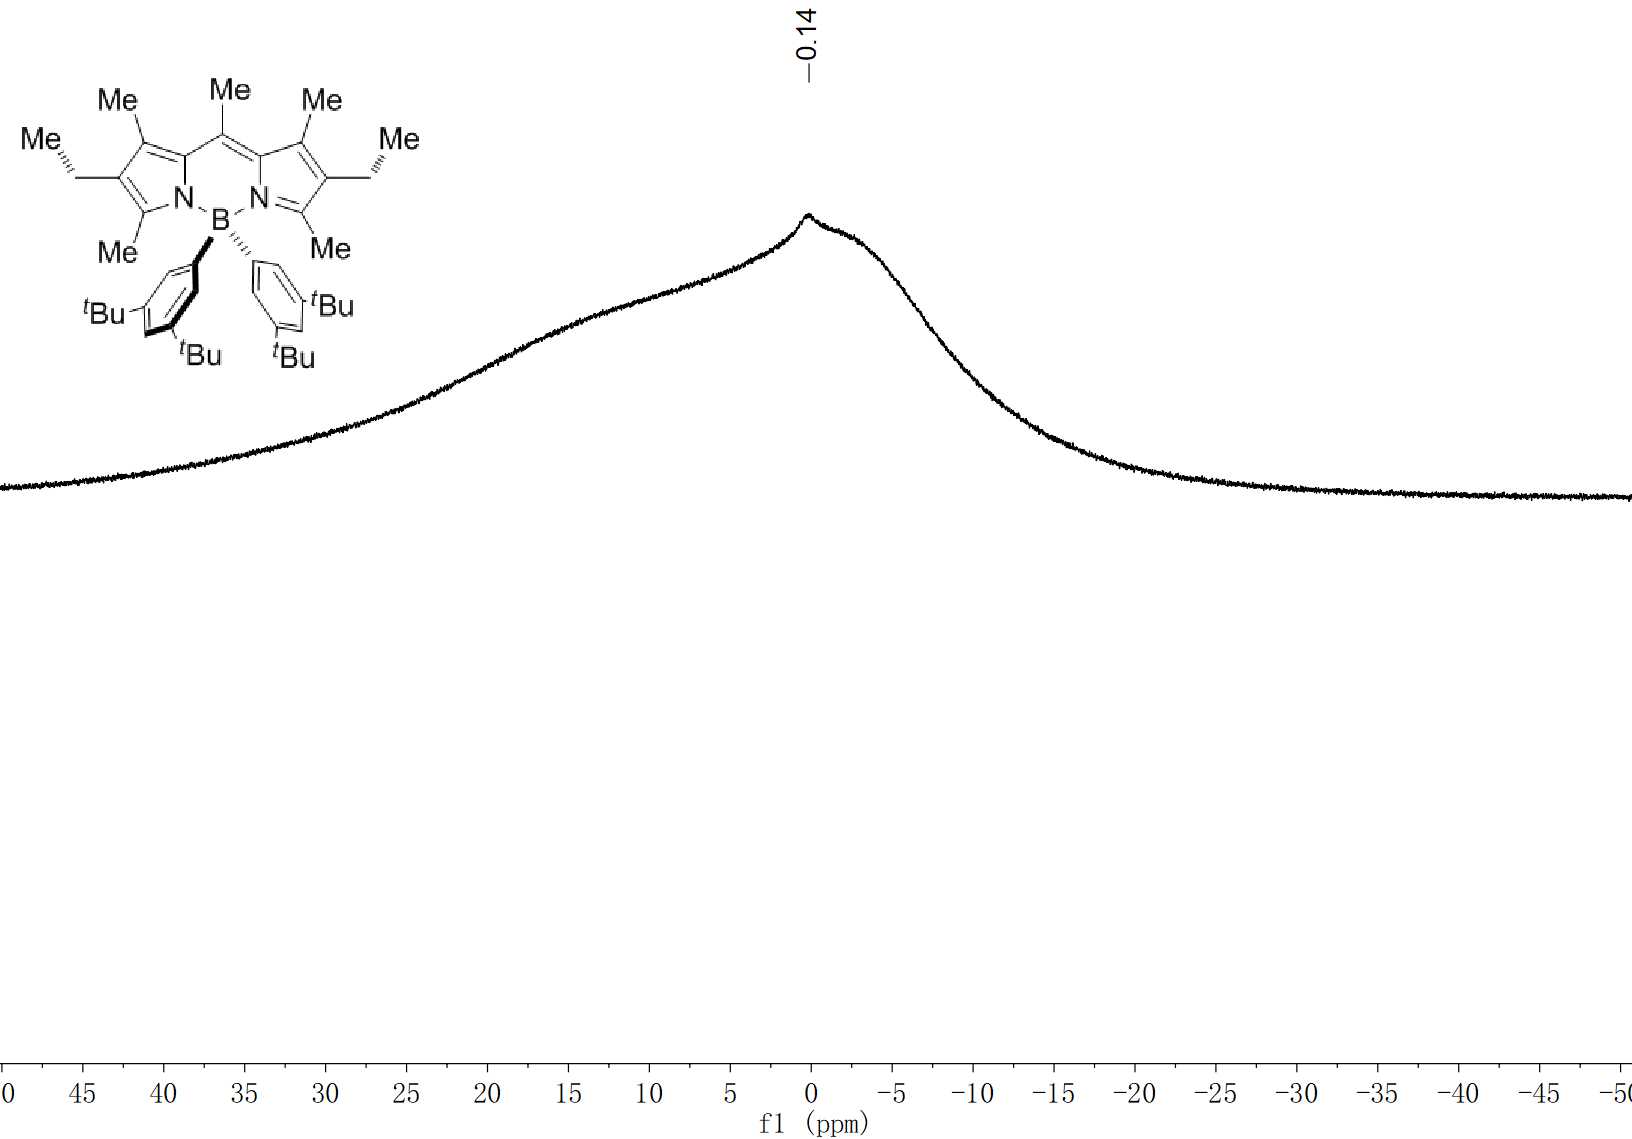


**Et-DABDP** 11B NMR (192 MHz, CDCl3)


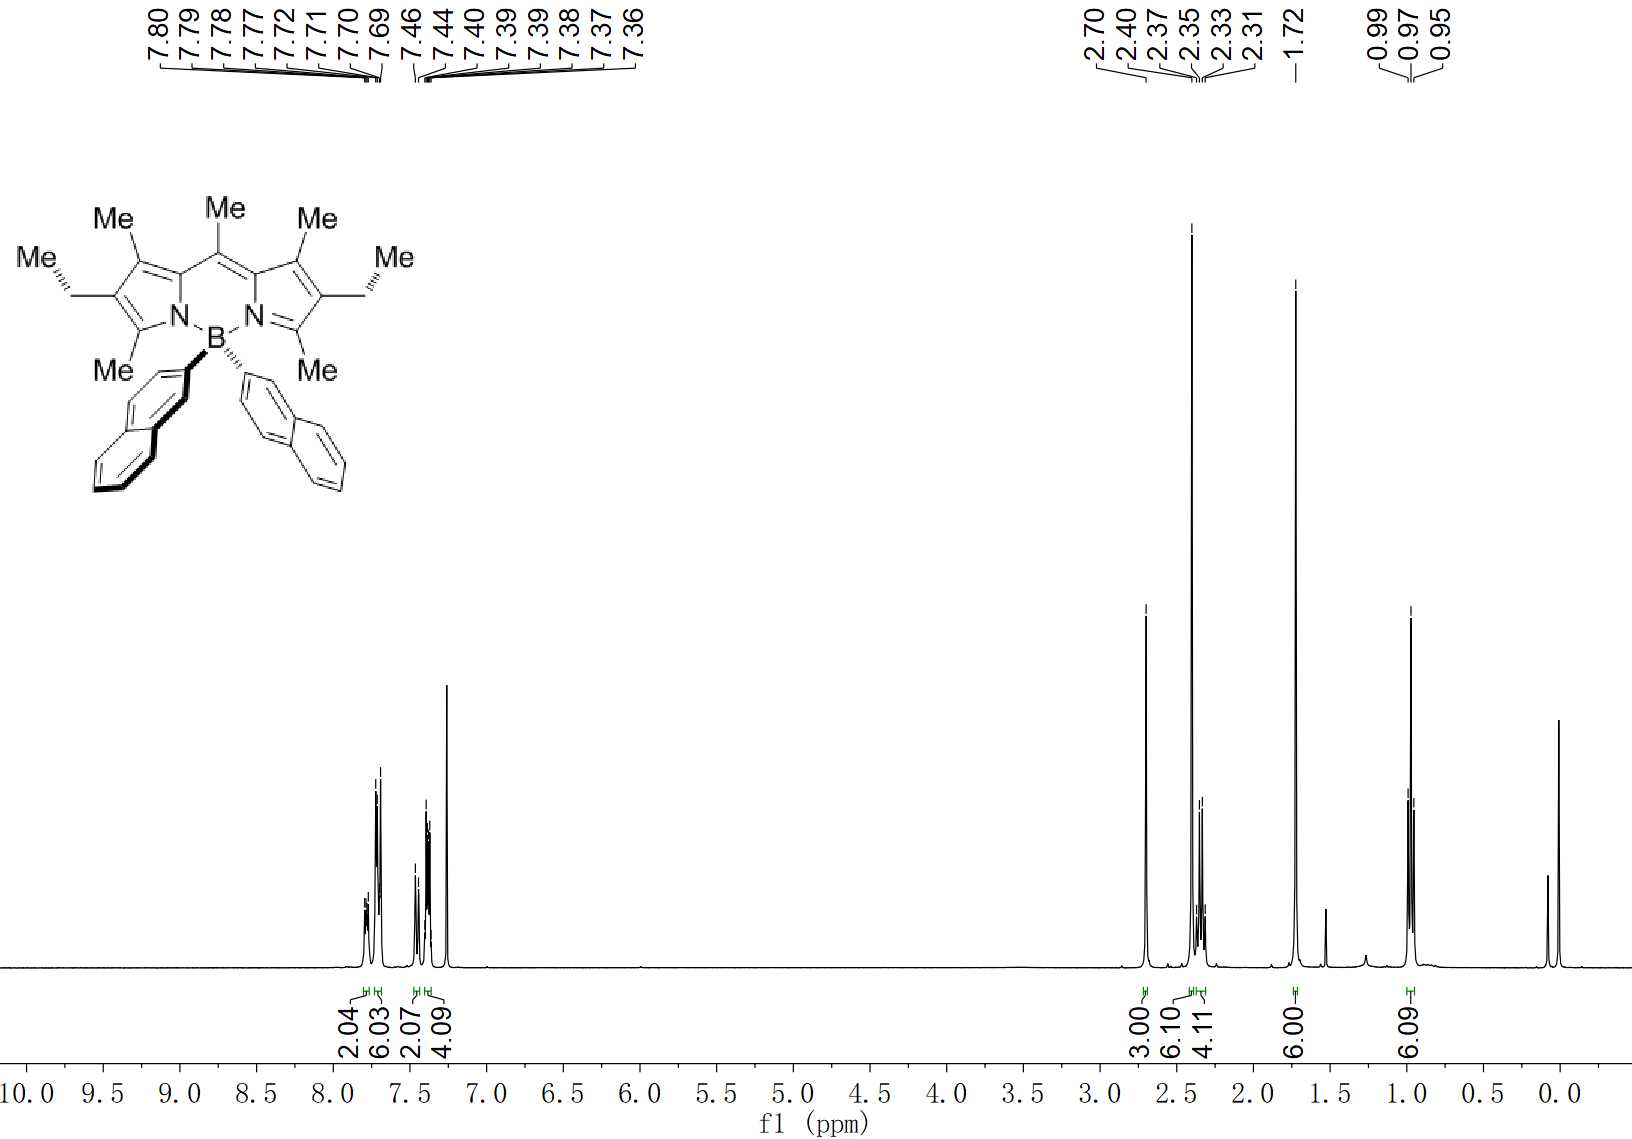


**Et-DABDP-Naph** 1H NMR (400 MHz, CDCl3)

**
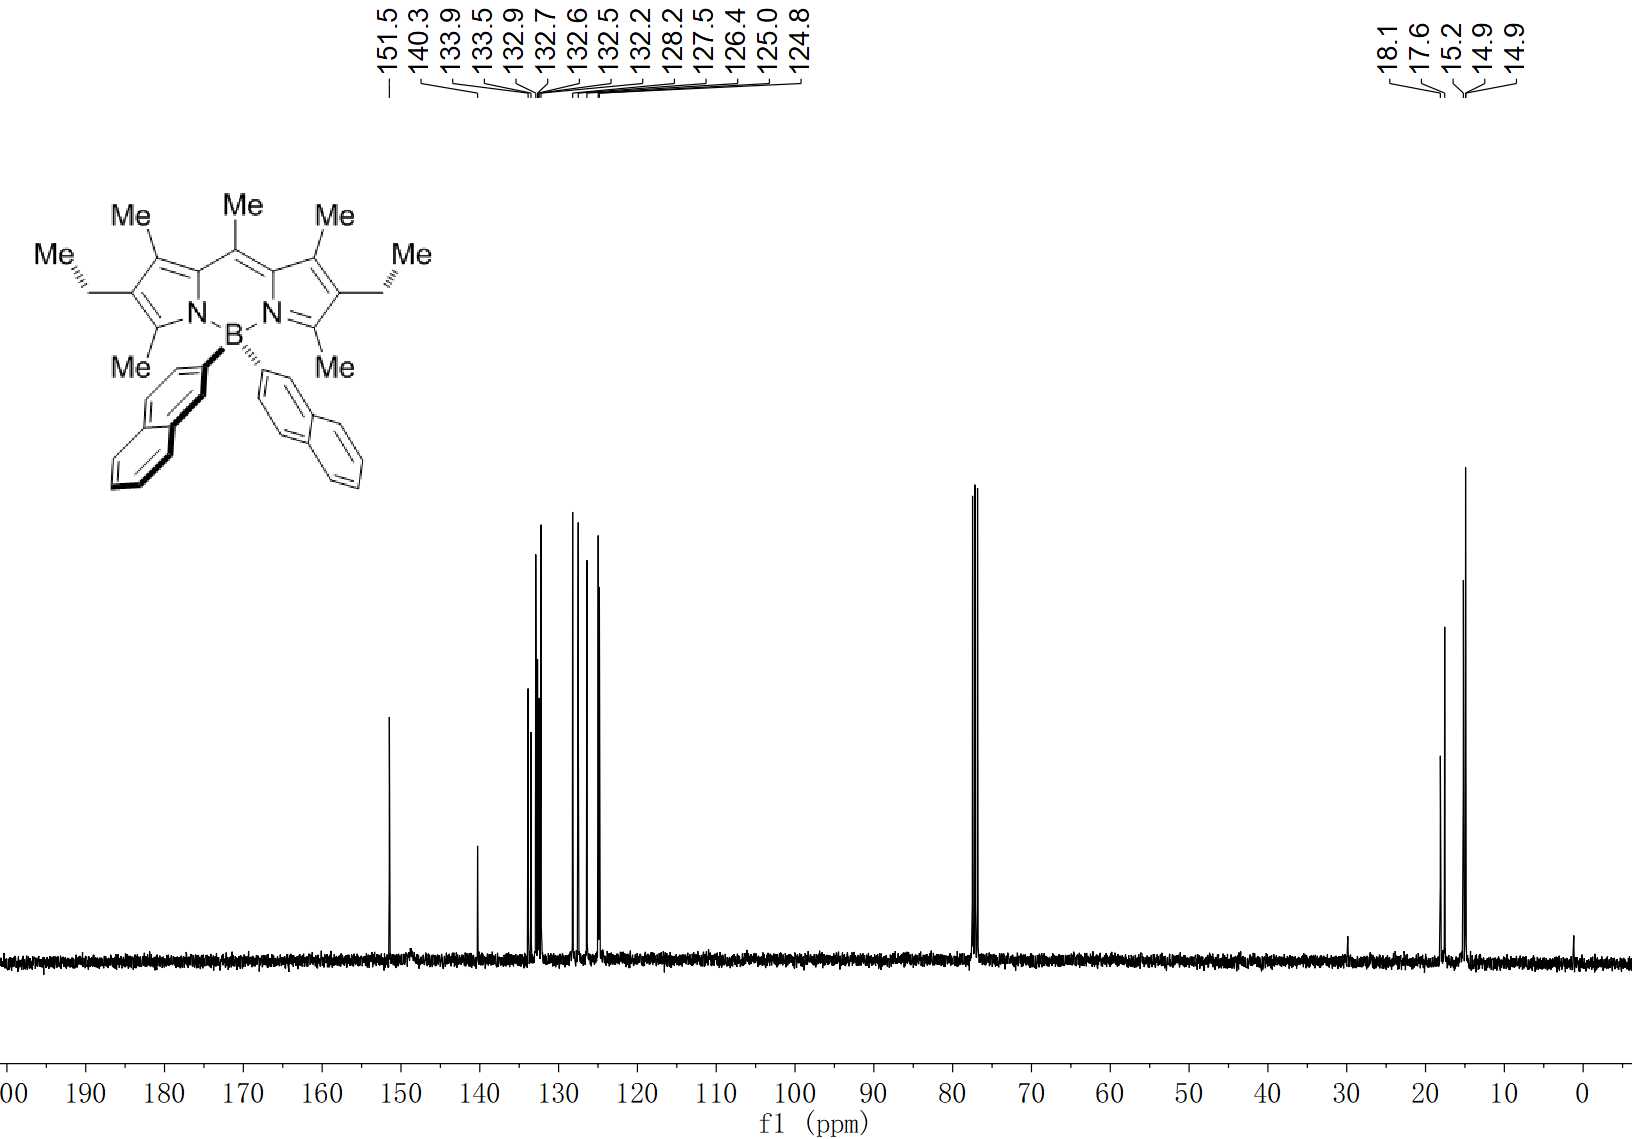
**

**Et-DABDP-Naph** 13C NMR (100 MHz, CDCl3)


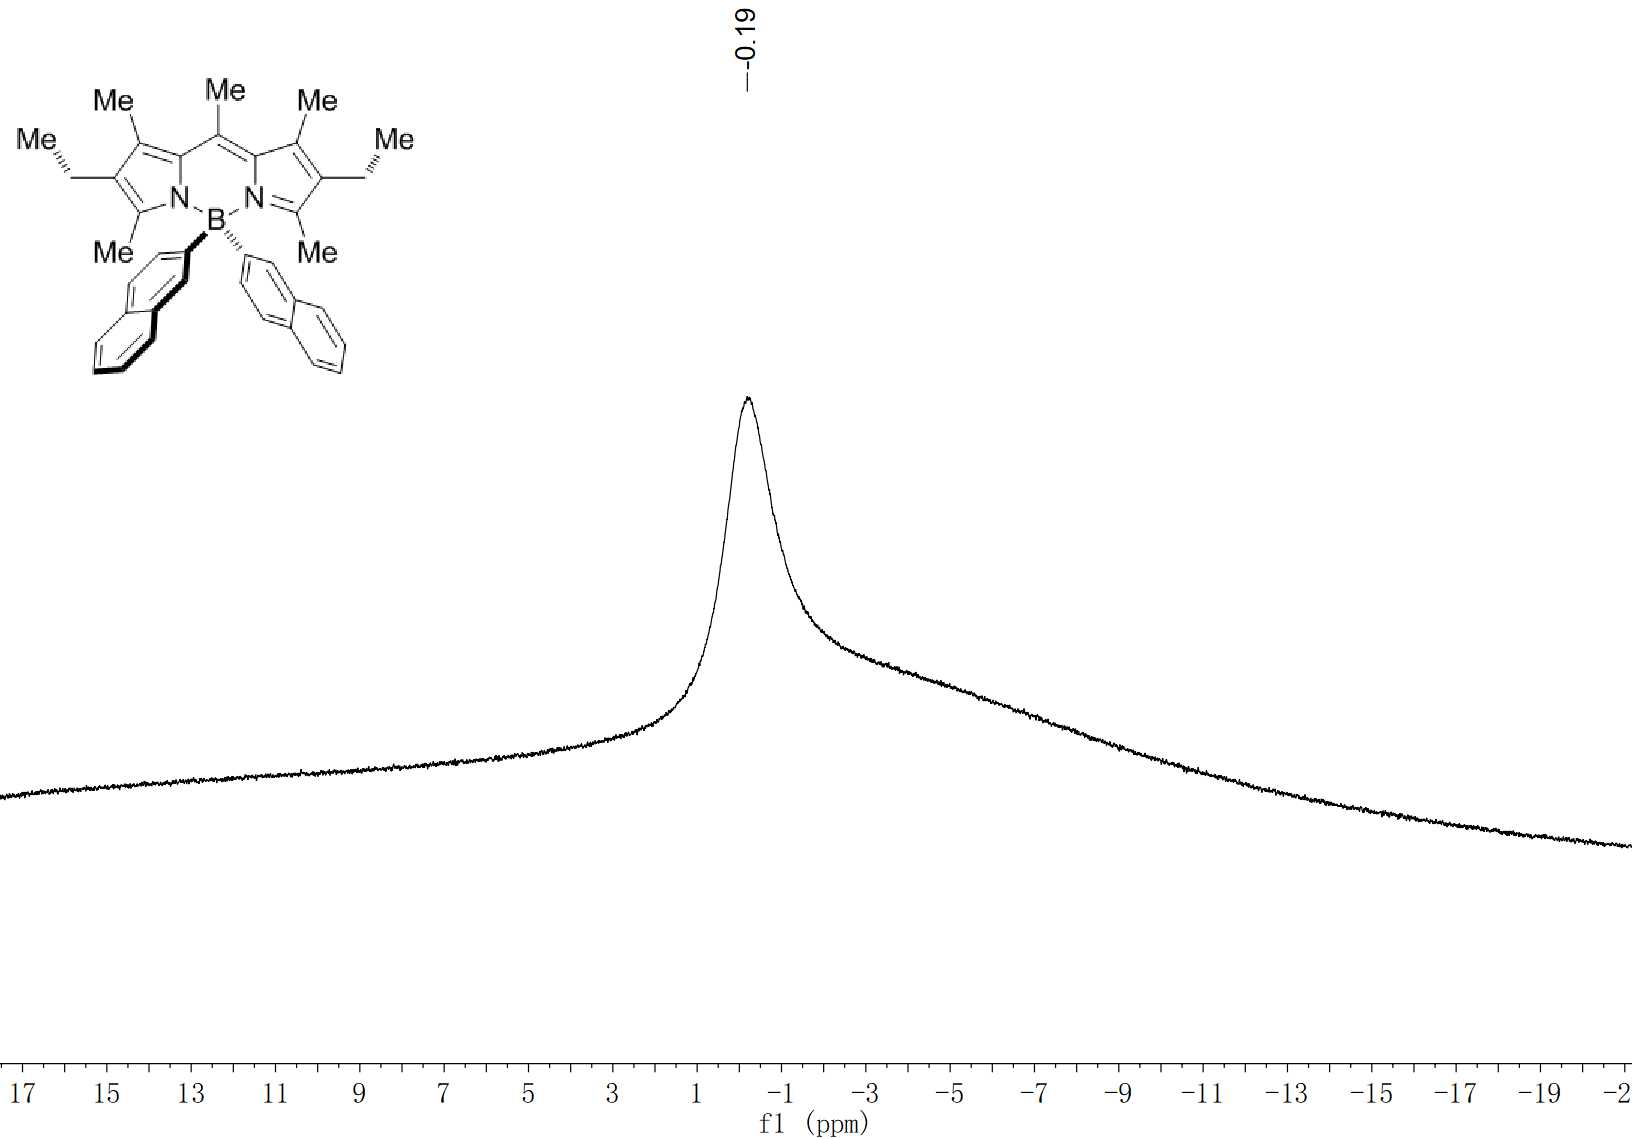


**Et-DABDP-Naph** 11B NMR (192 MHz, CDCl3)


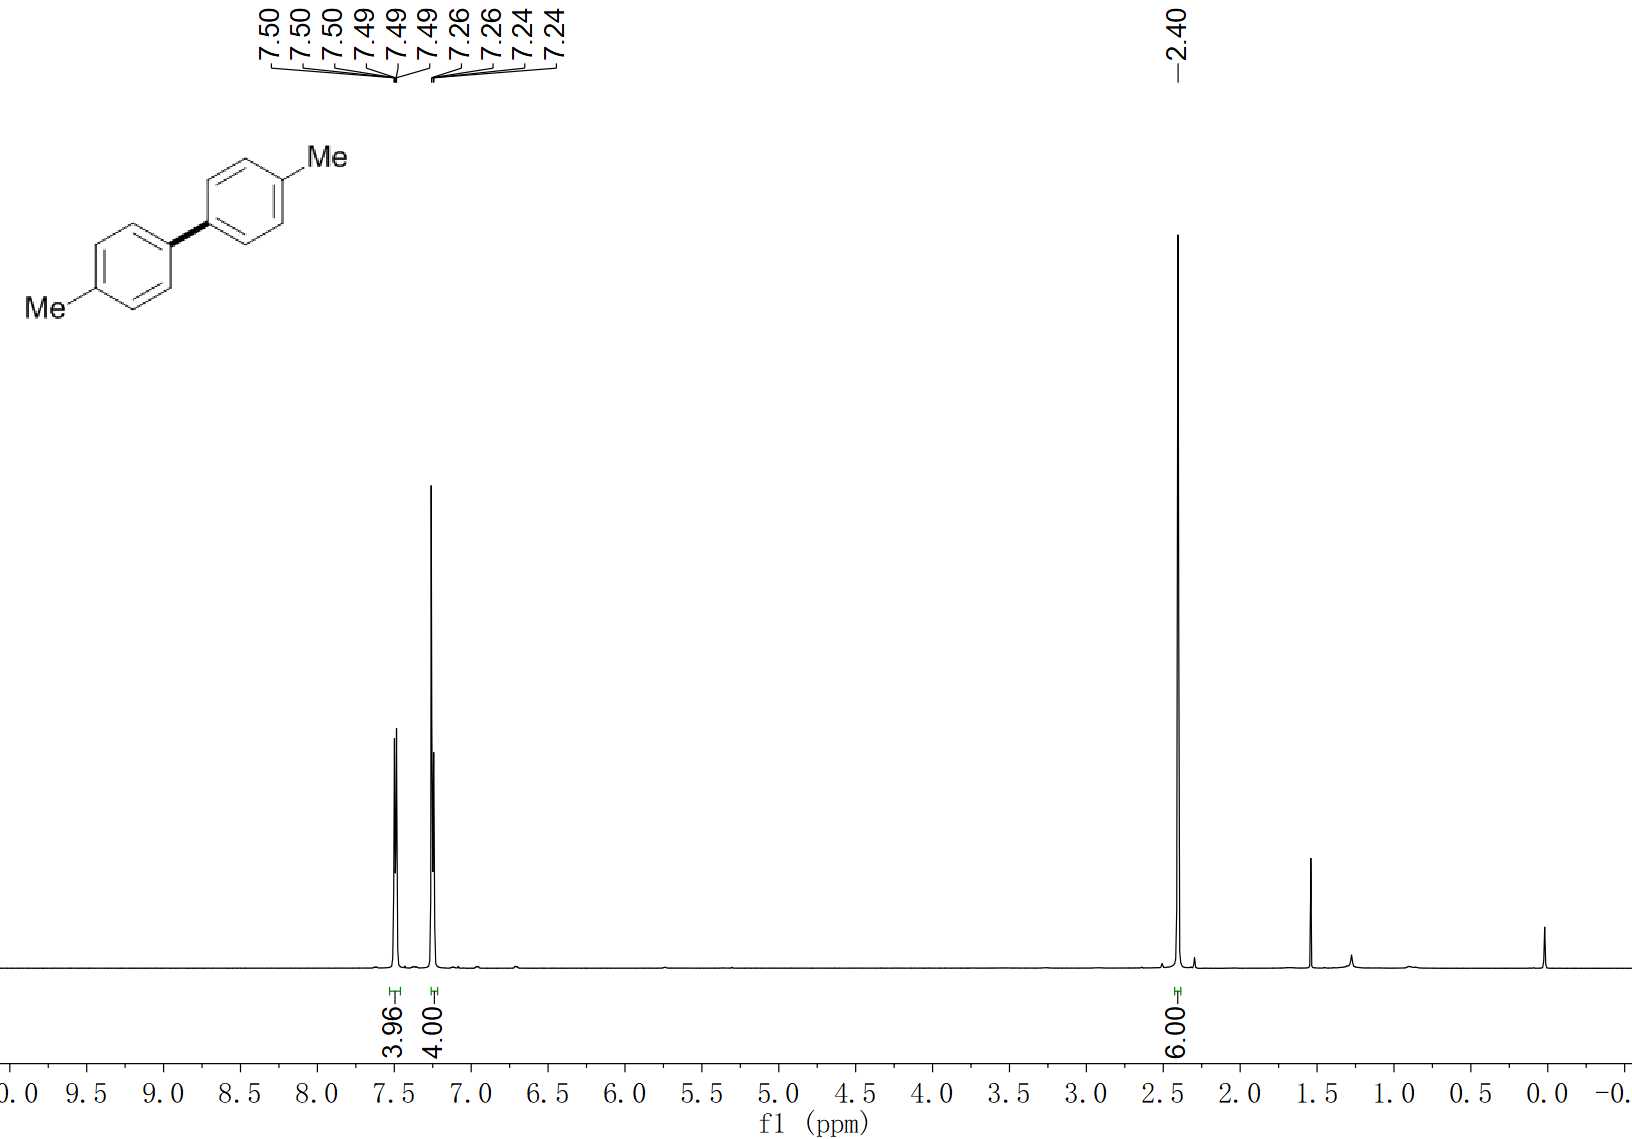


**5** 1H NMR (600 MHz, CDCl3)


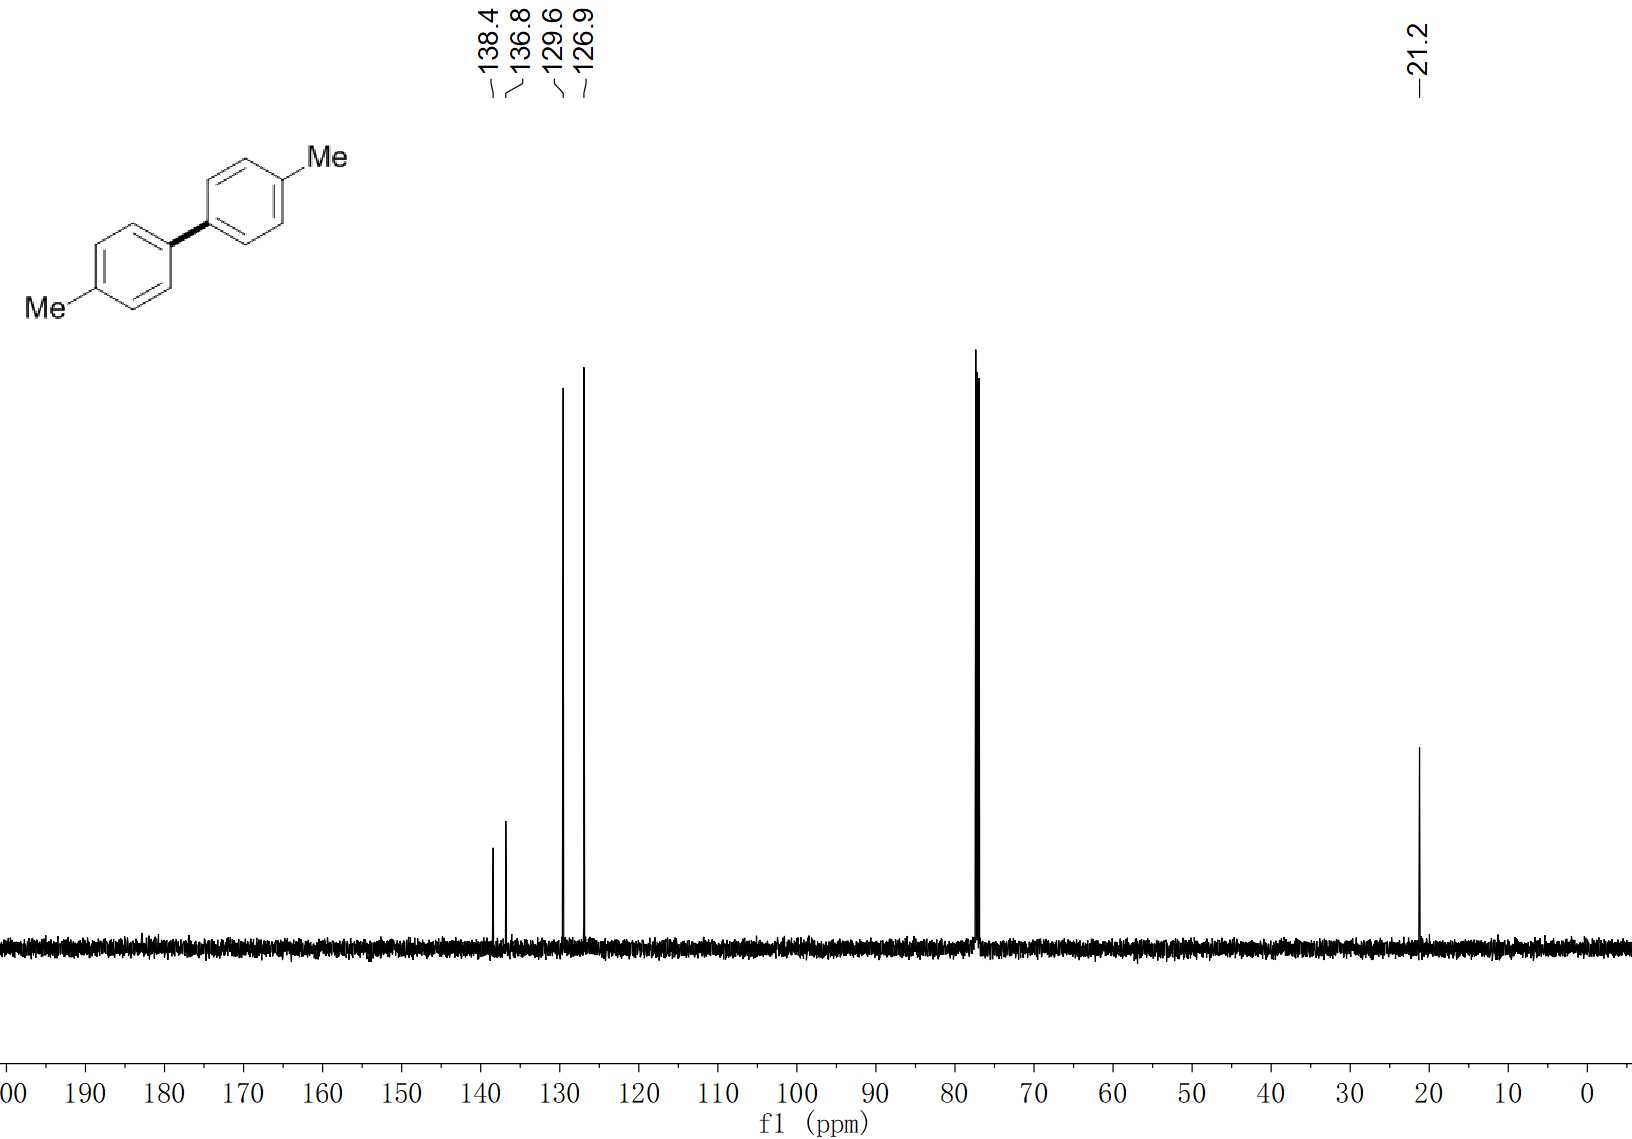


**5** 13C NMR (150 MHz, CDCl3)


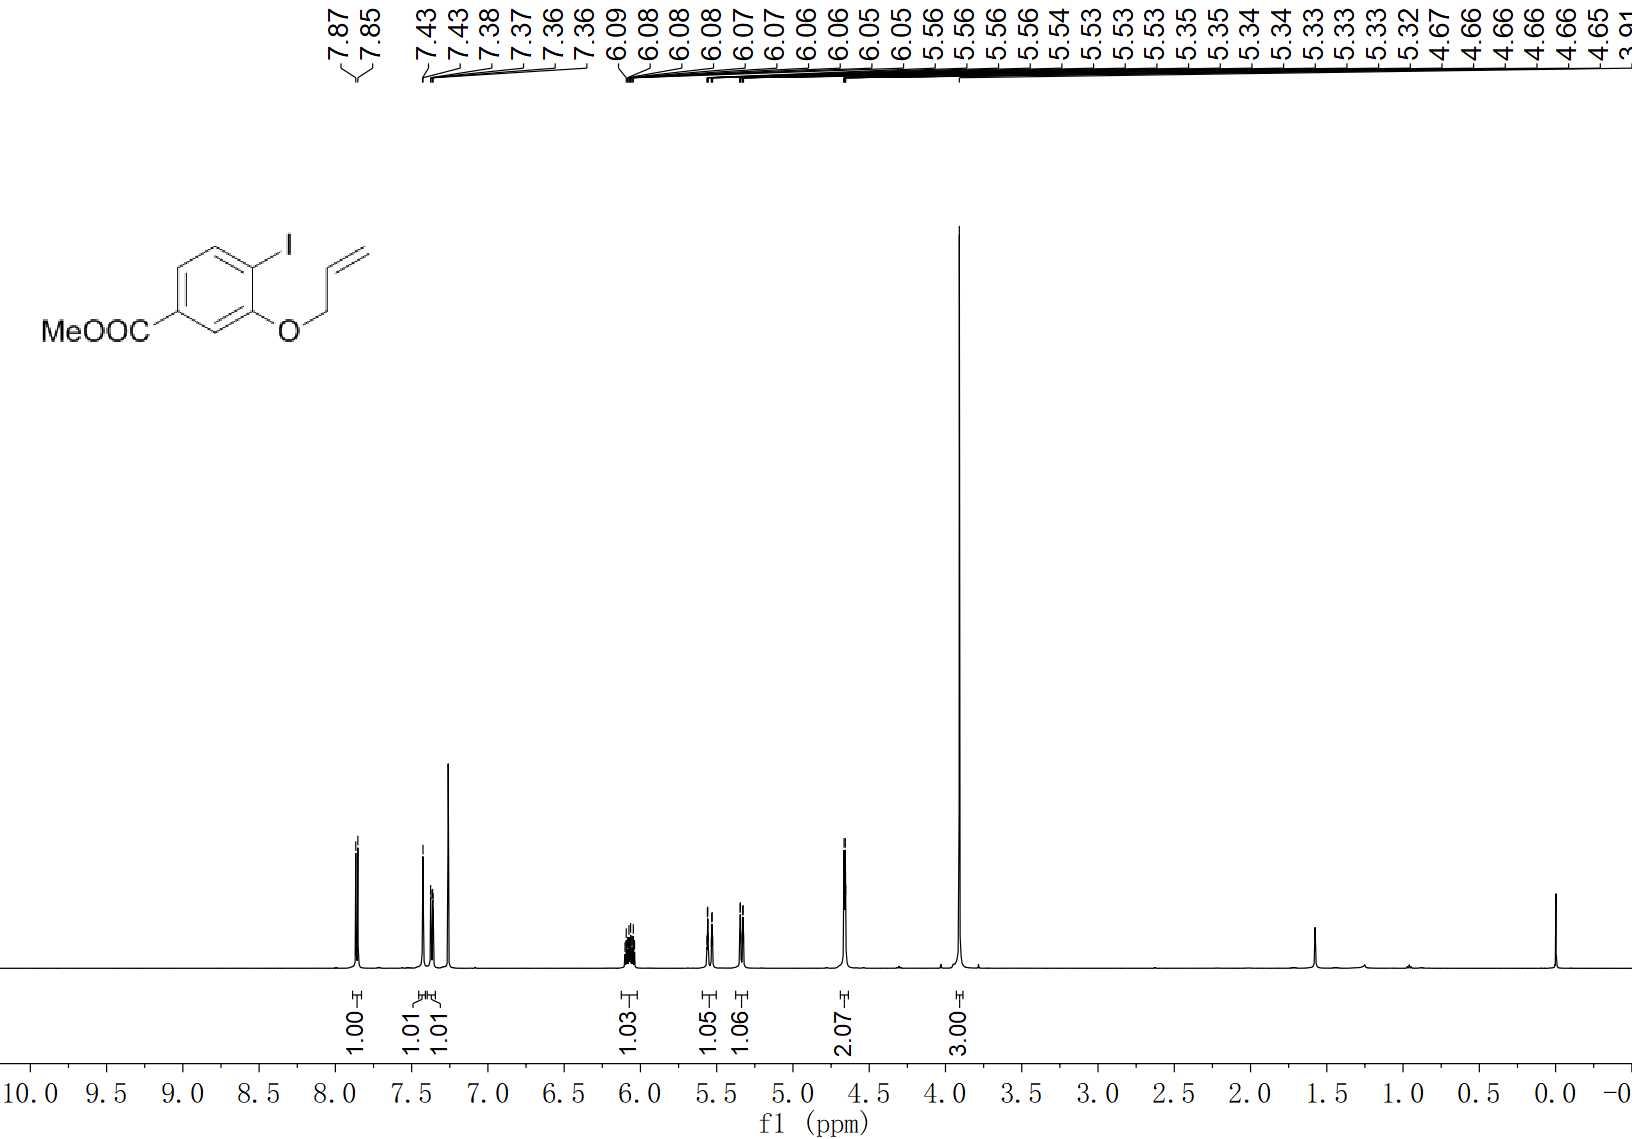


**6** 1H NMR (600 MHz, CDCl3)


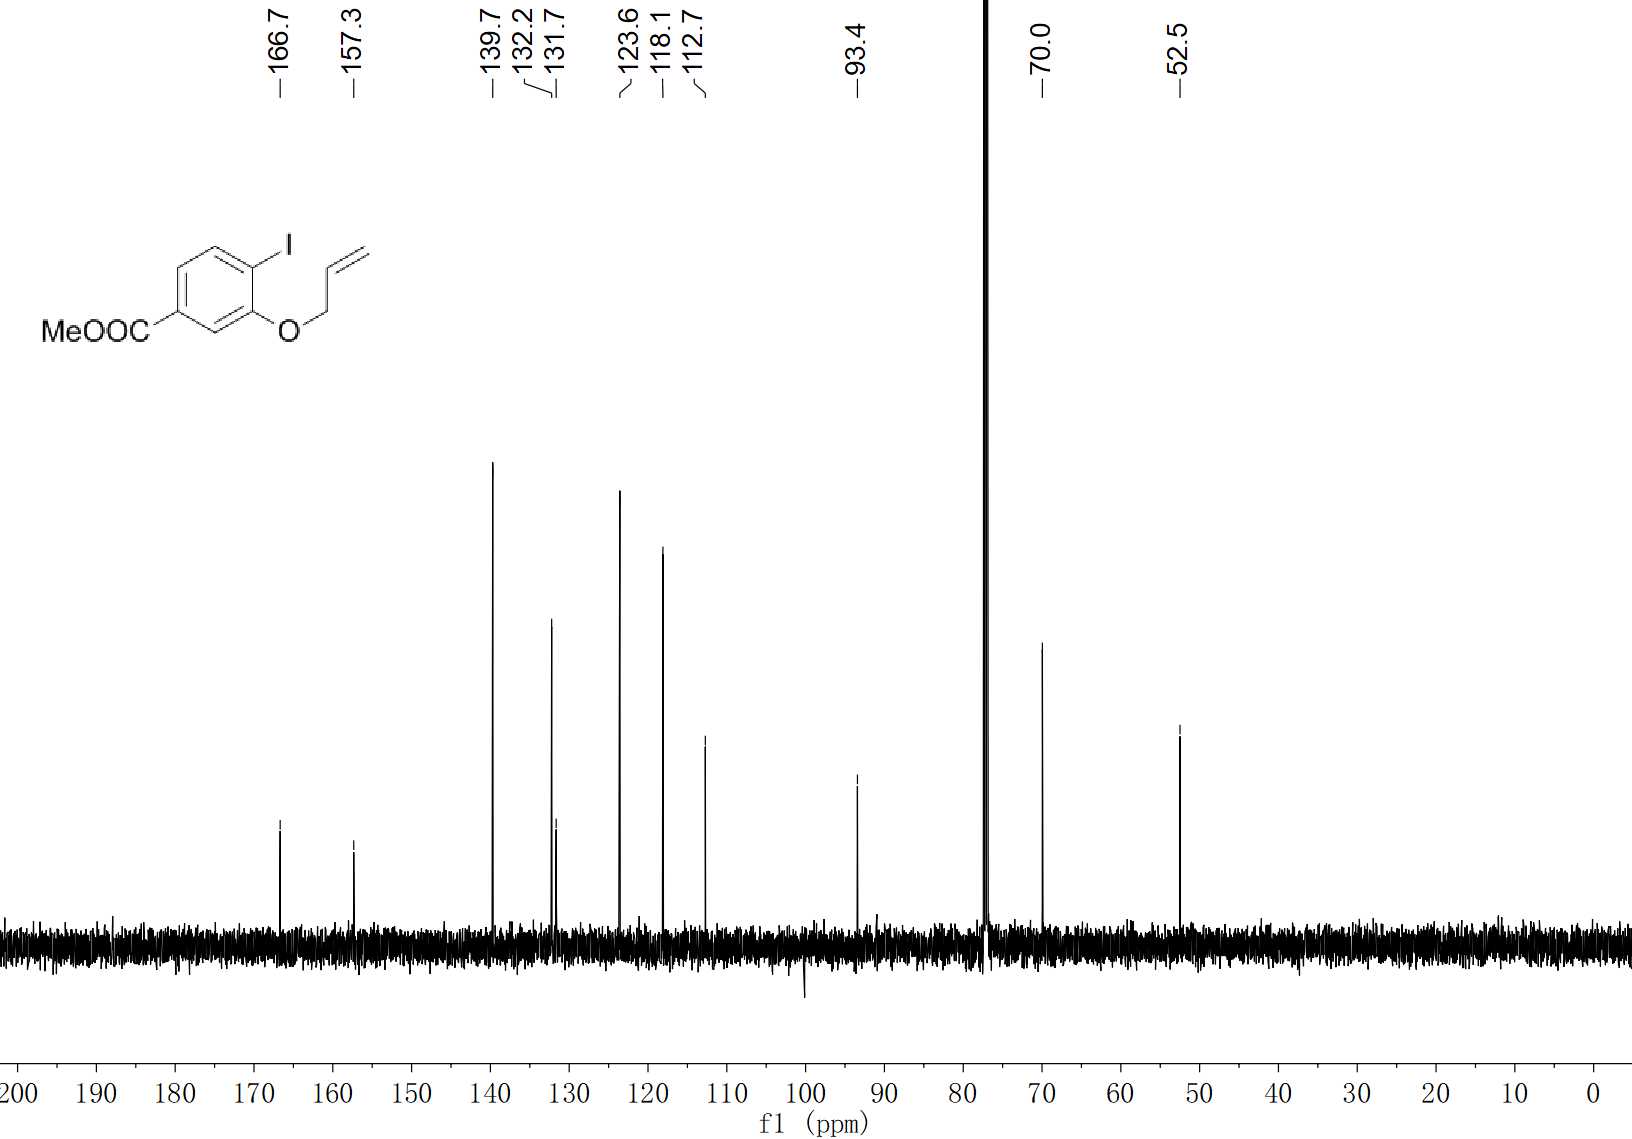


**6** 13C NMR (150 MHz, CDCl3)


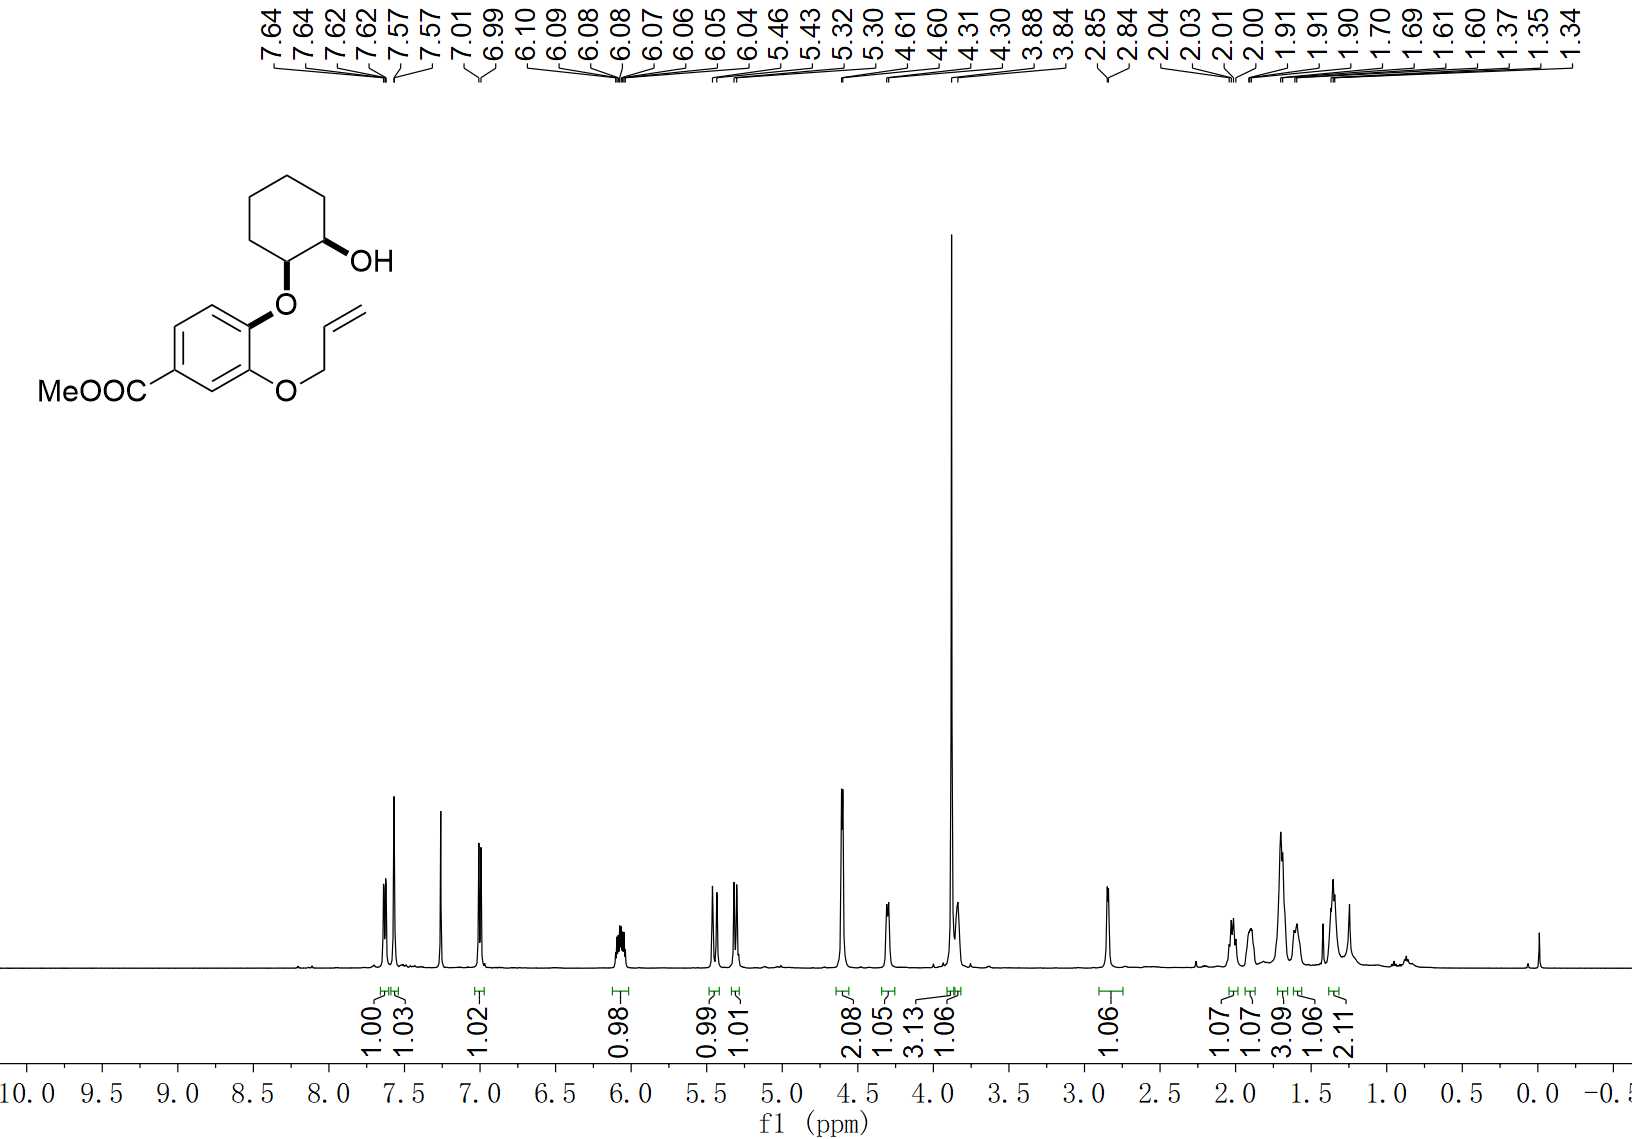


**8** 1H NMR (400 MHz, CDCl3)


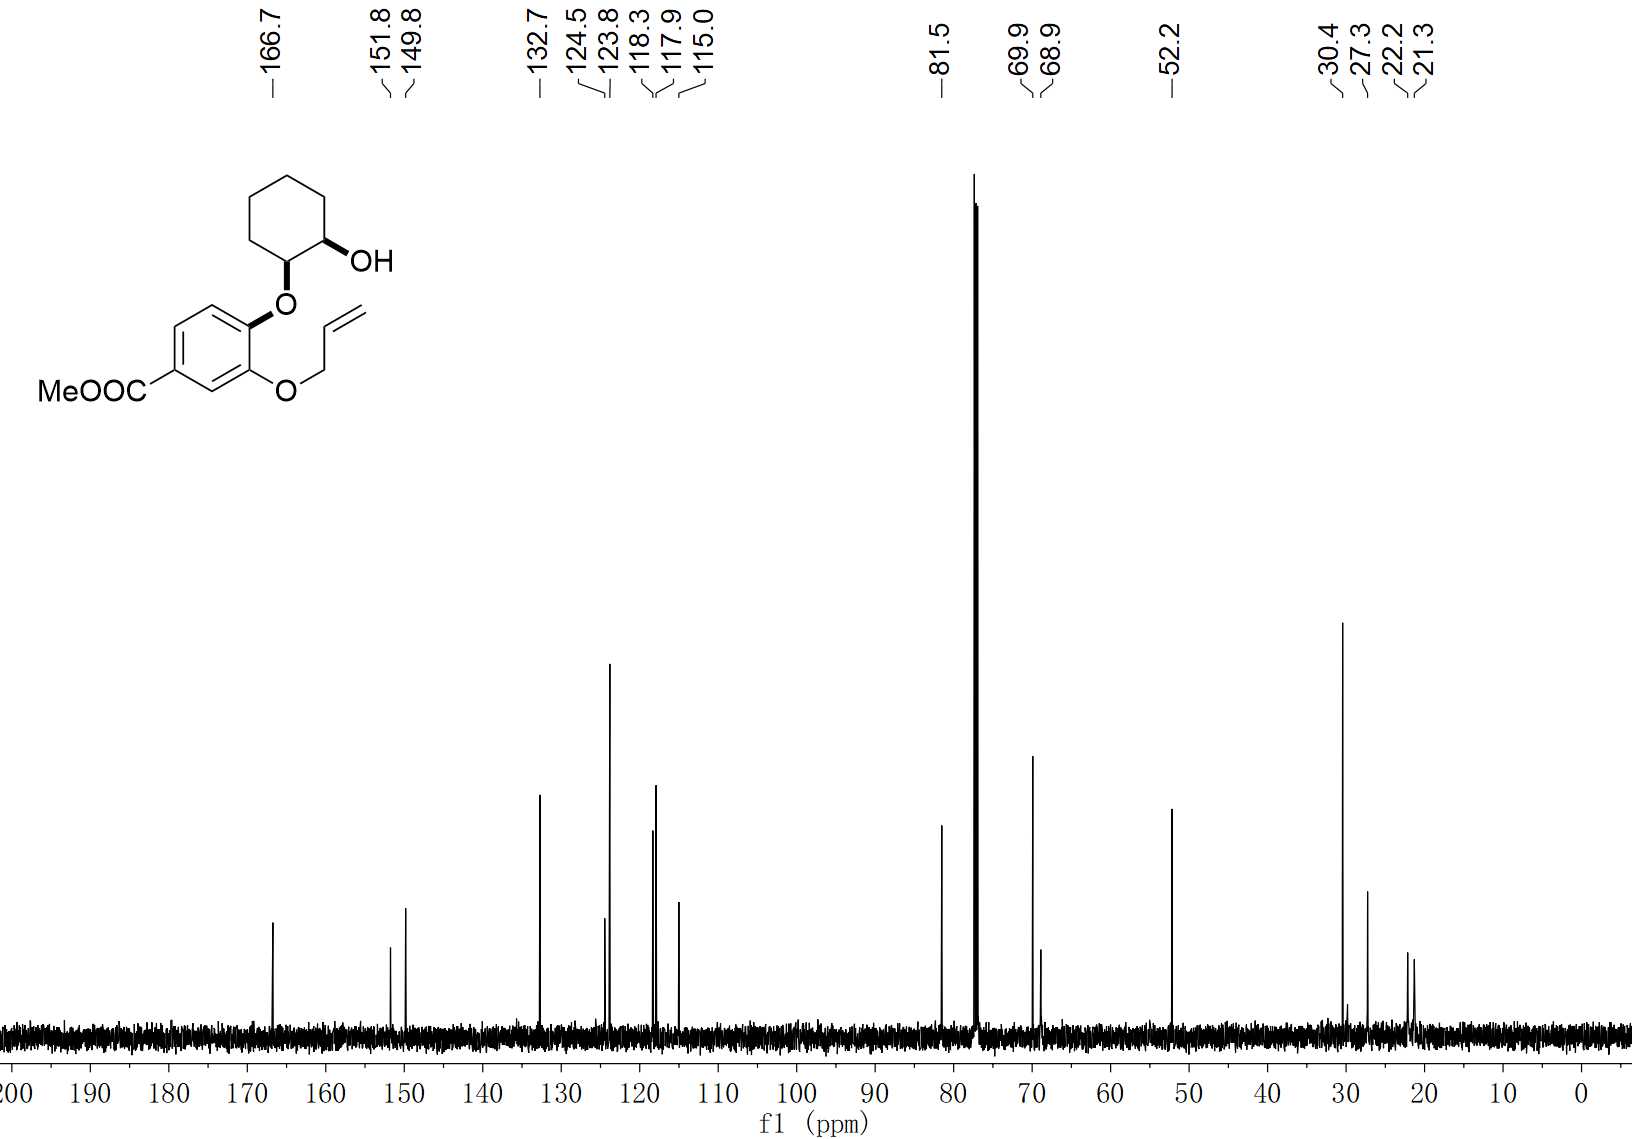


**8** 13C NMR (150 MHz, CDCl3)


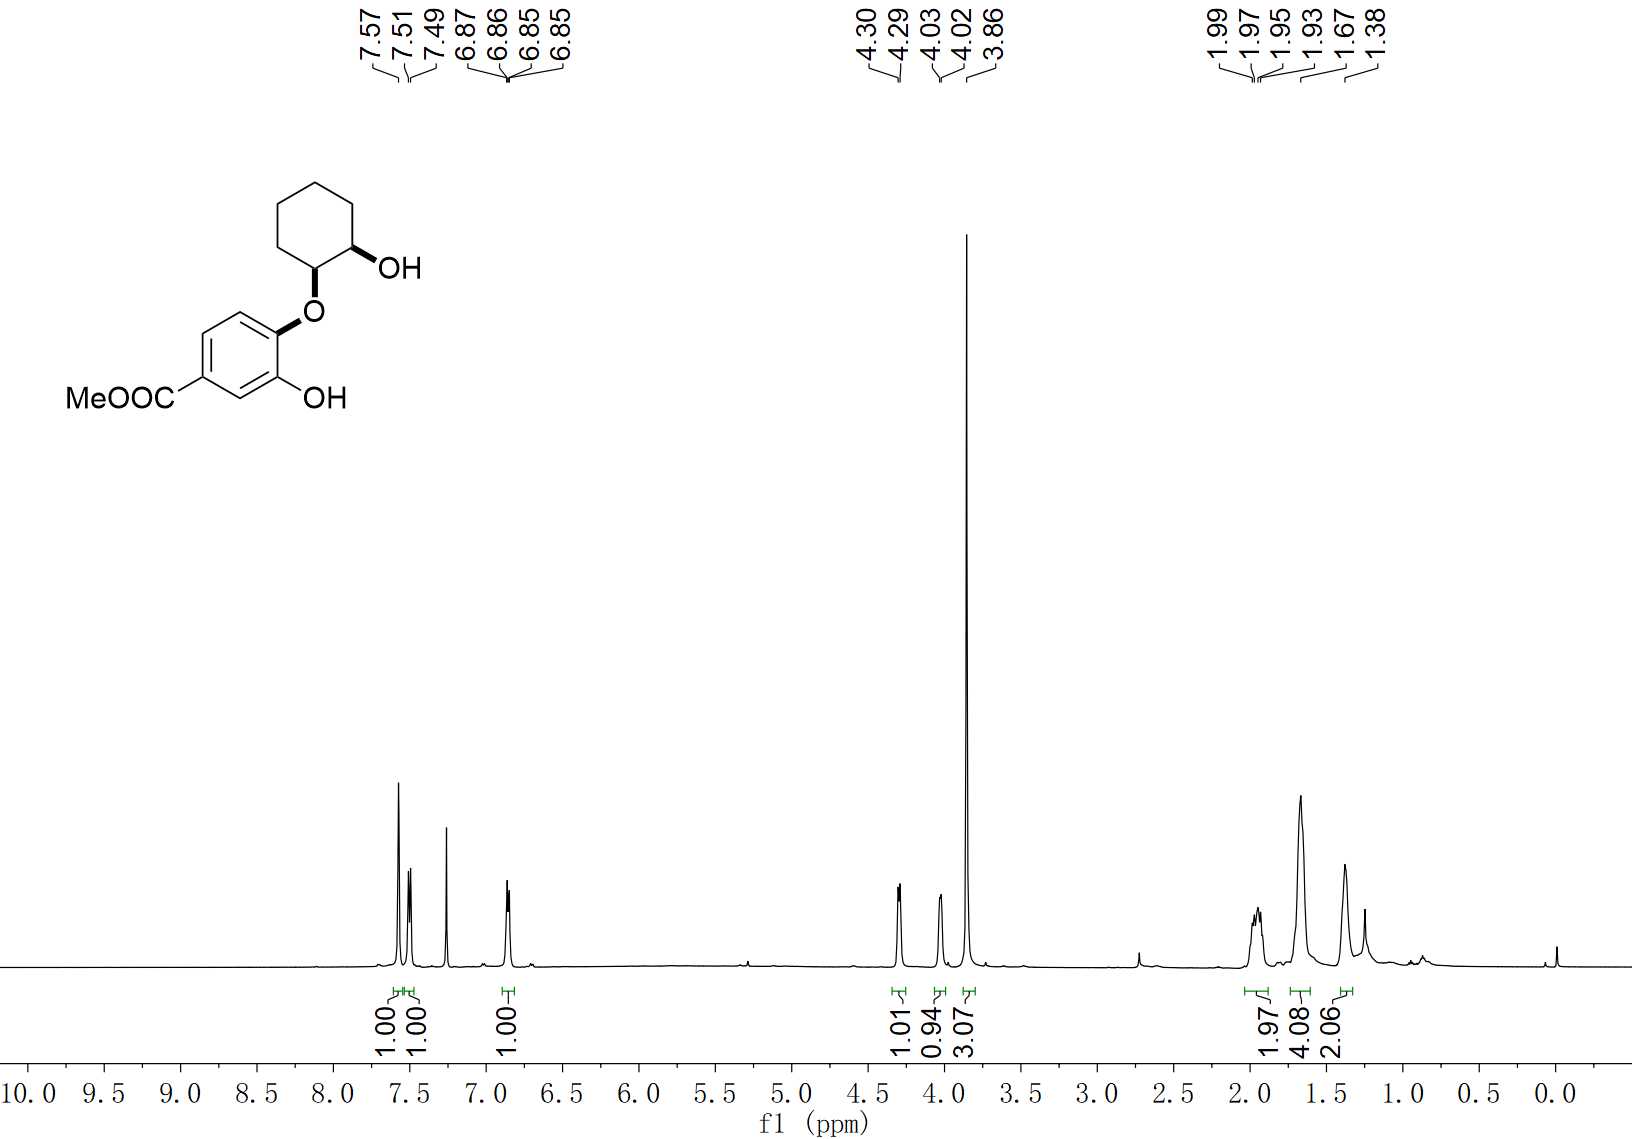


**9** 1H NMR (400 MHz, CDCl3)


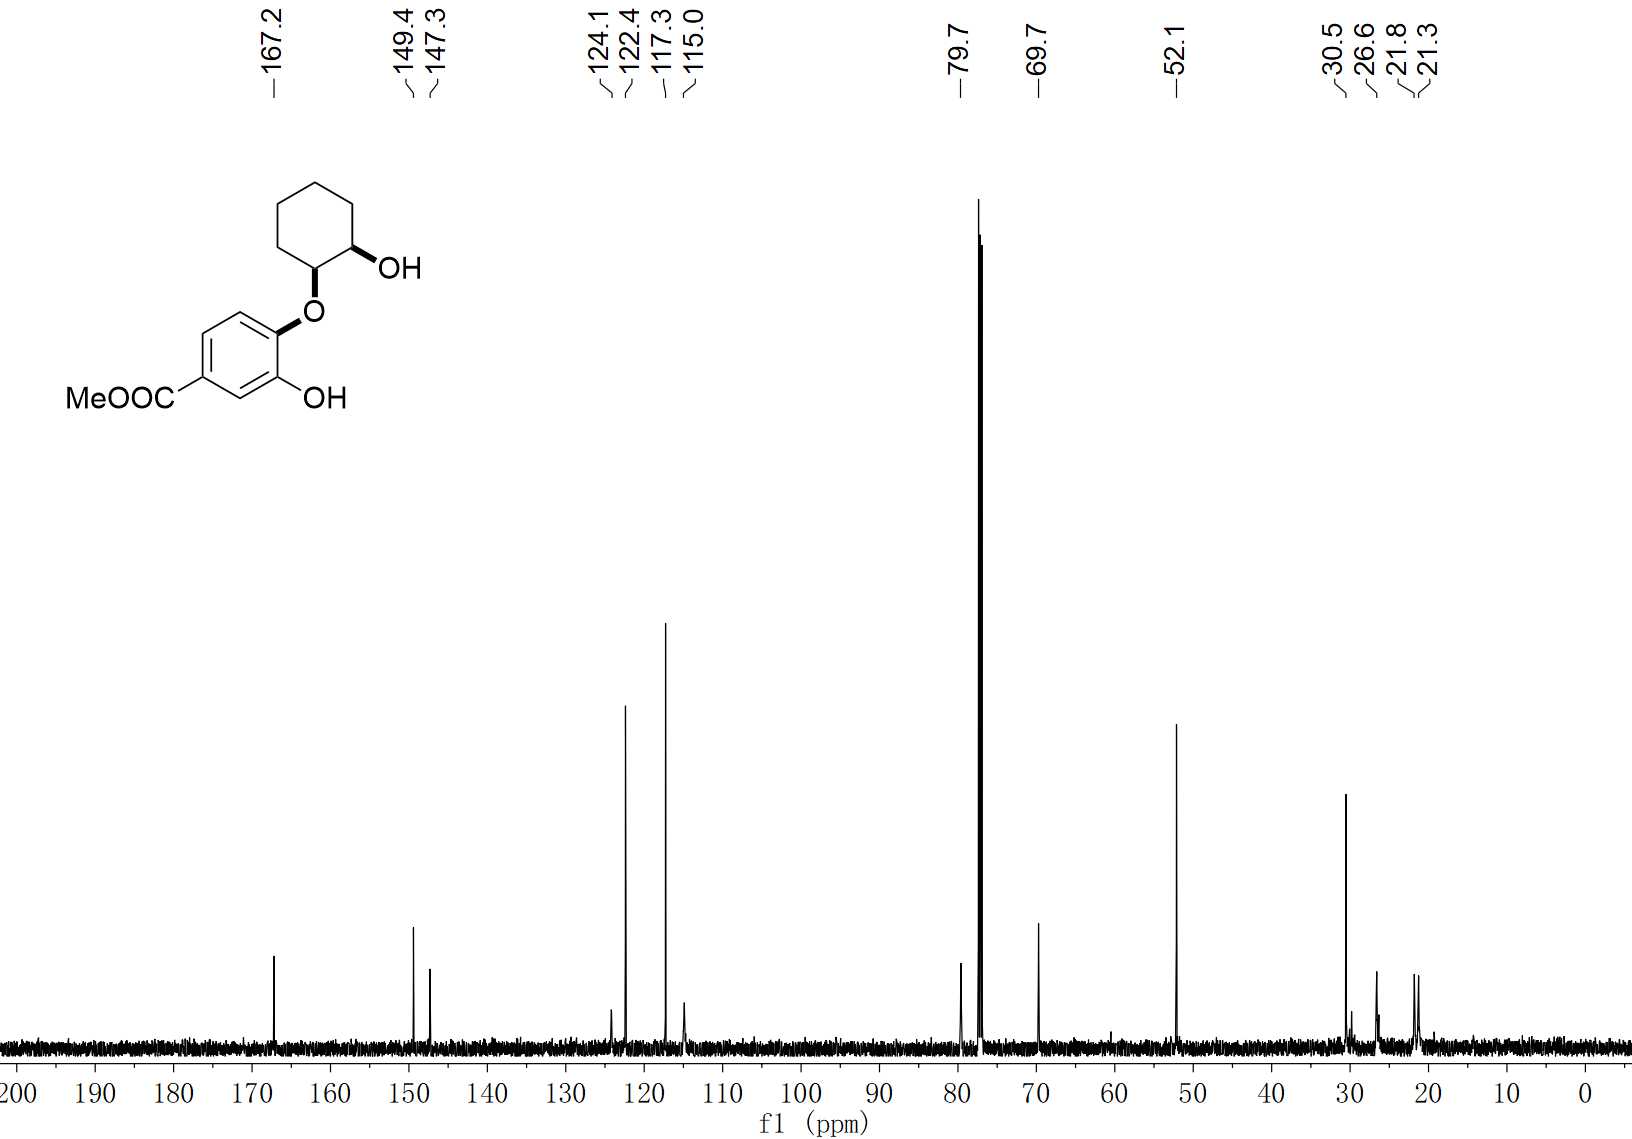


**9** 13C NMR (150 MHz, CDCl3)


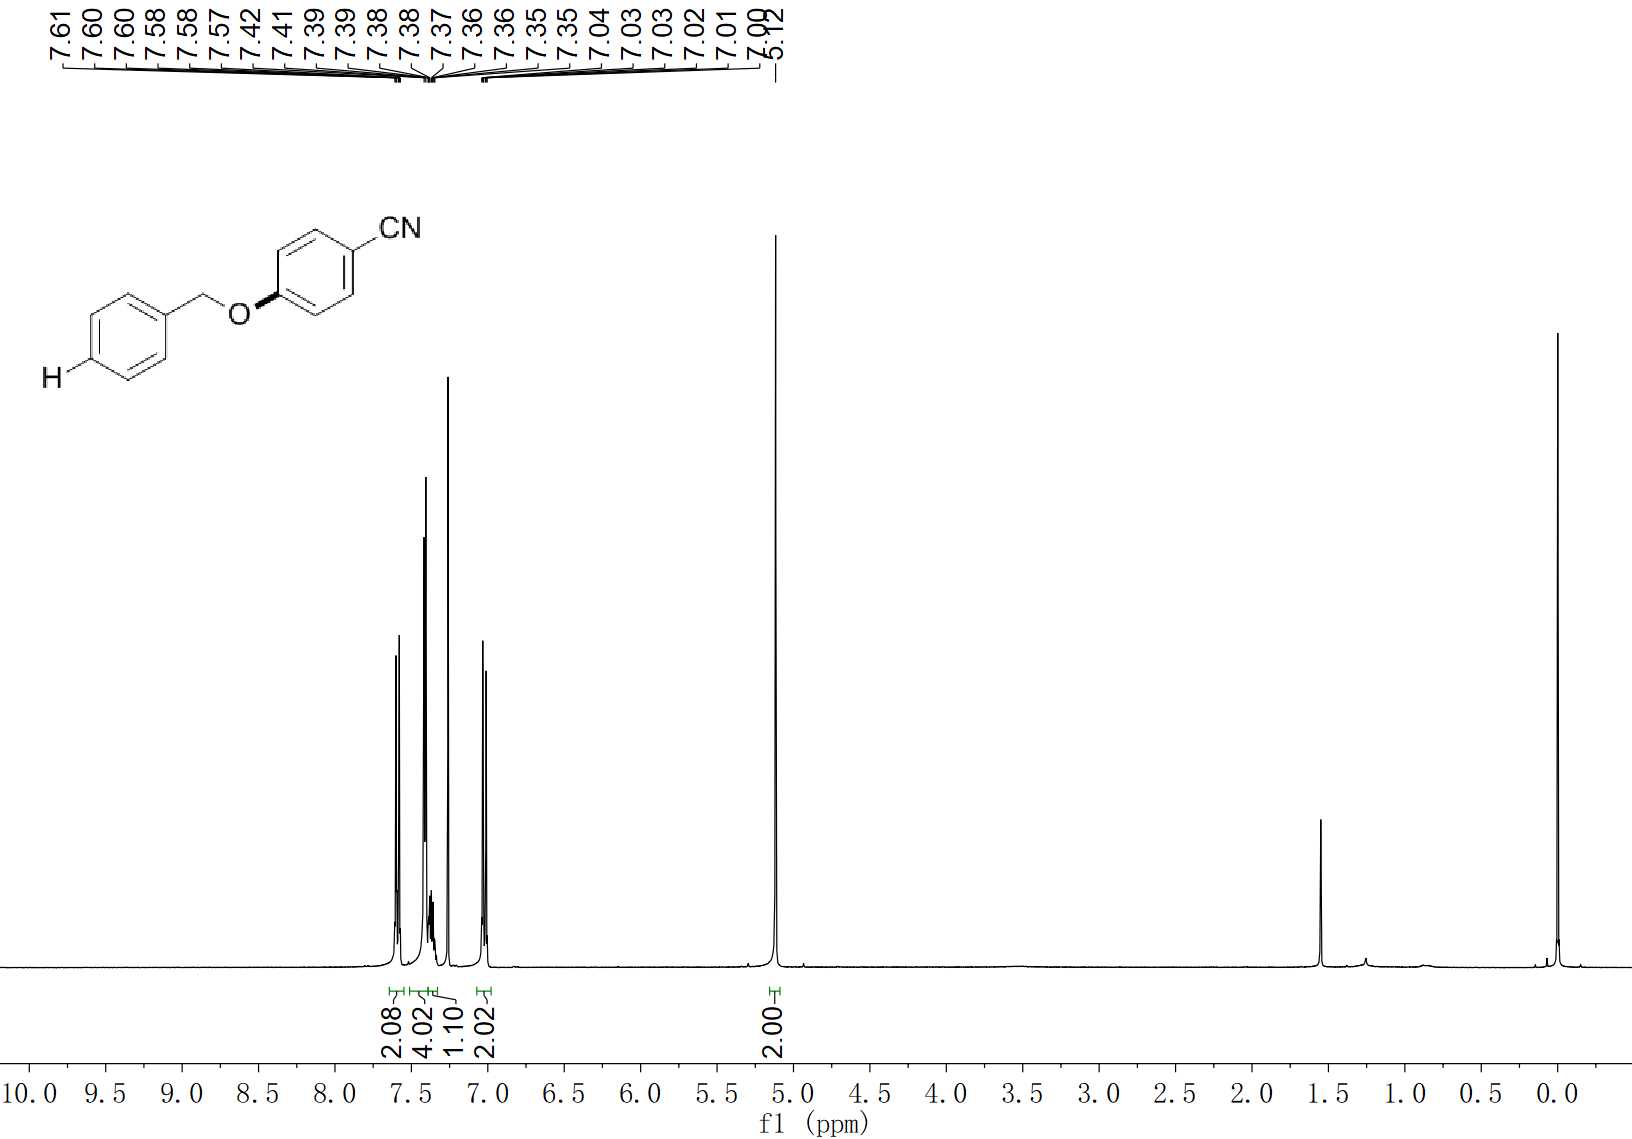


**14** 1H NMR (400 MHz, CDCl3)


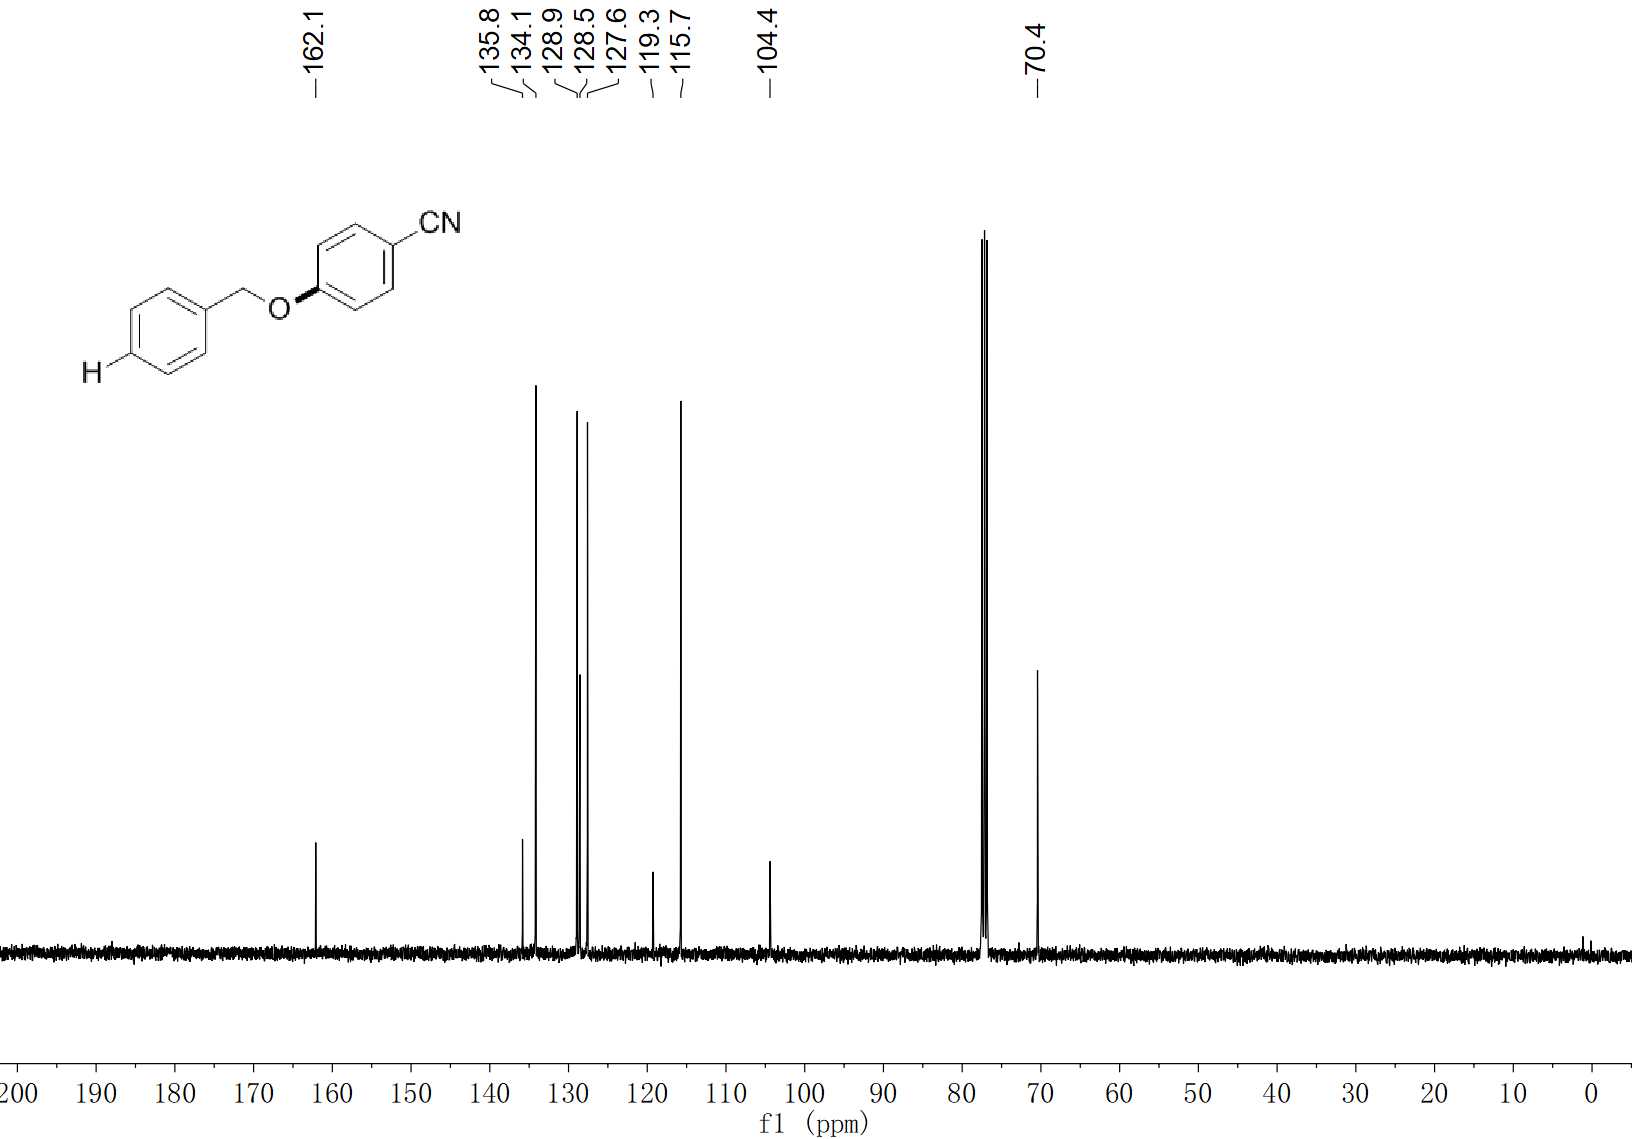


**14** 13C NMR (100 MHz, CDCl3)


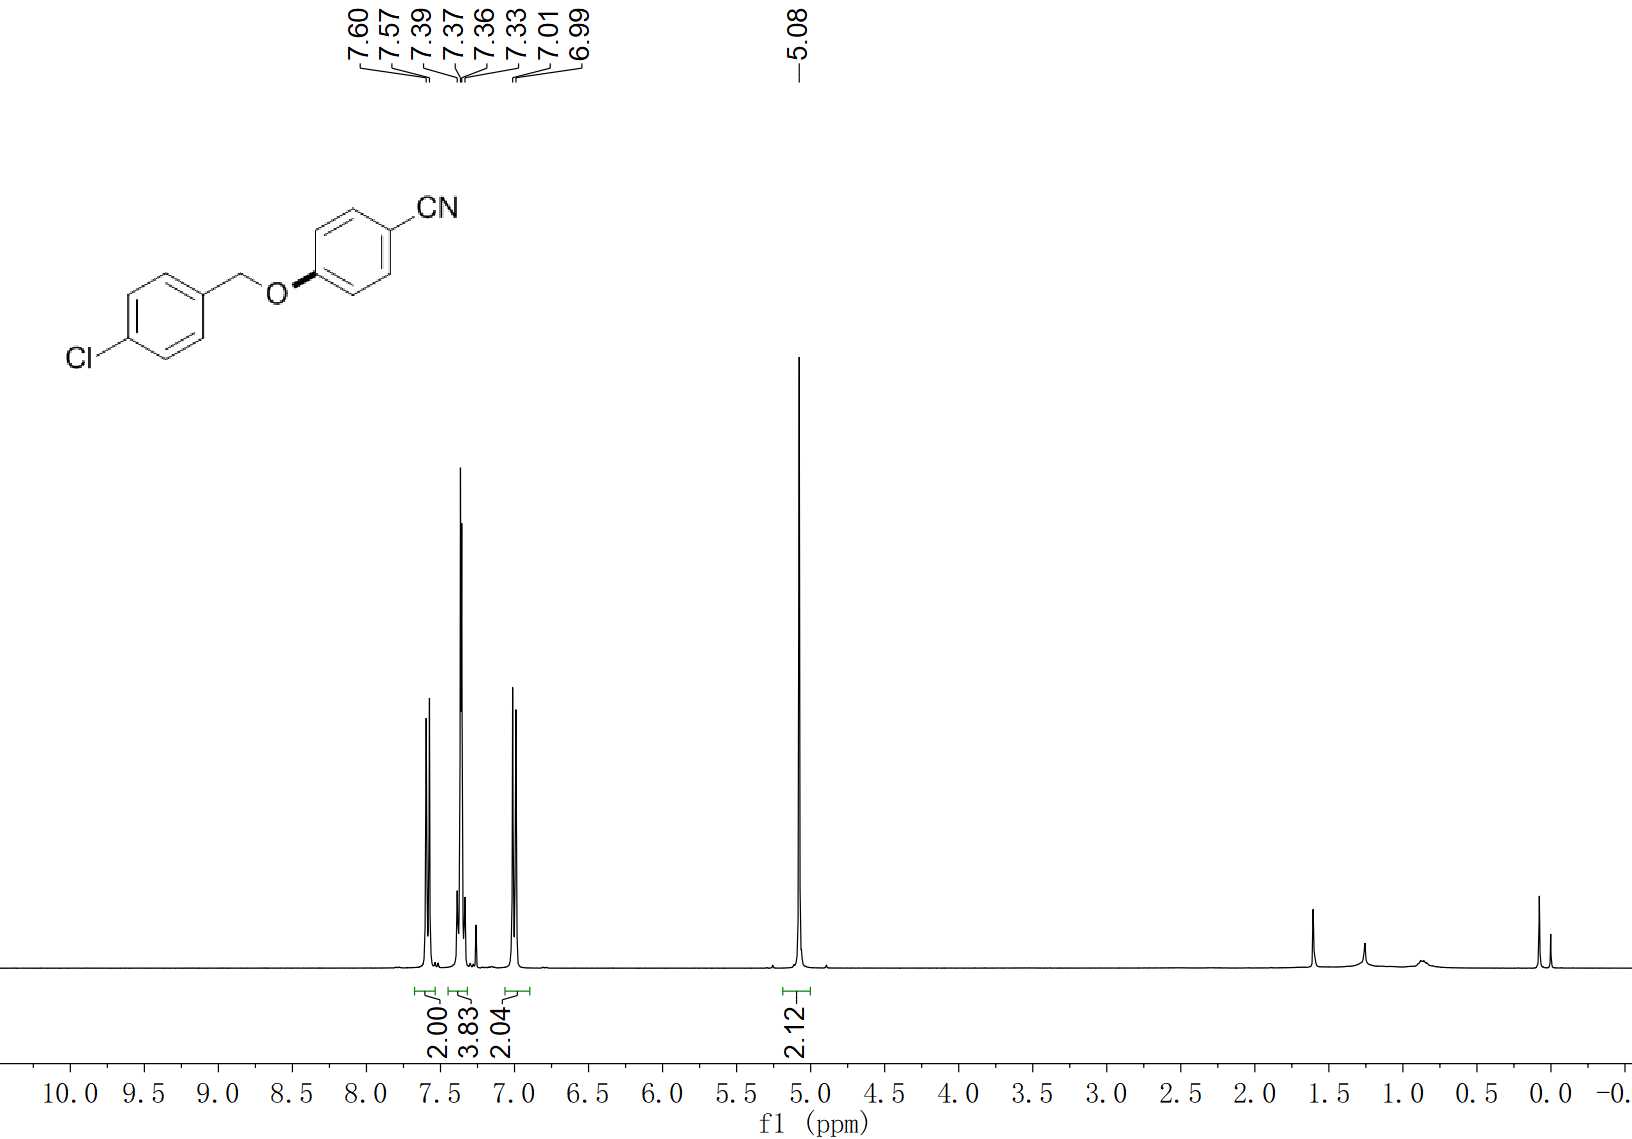


**15** 1H NMR (400 MHz, CDCl3)


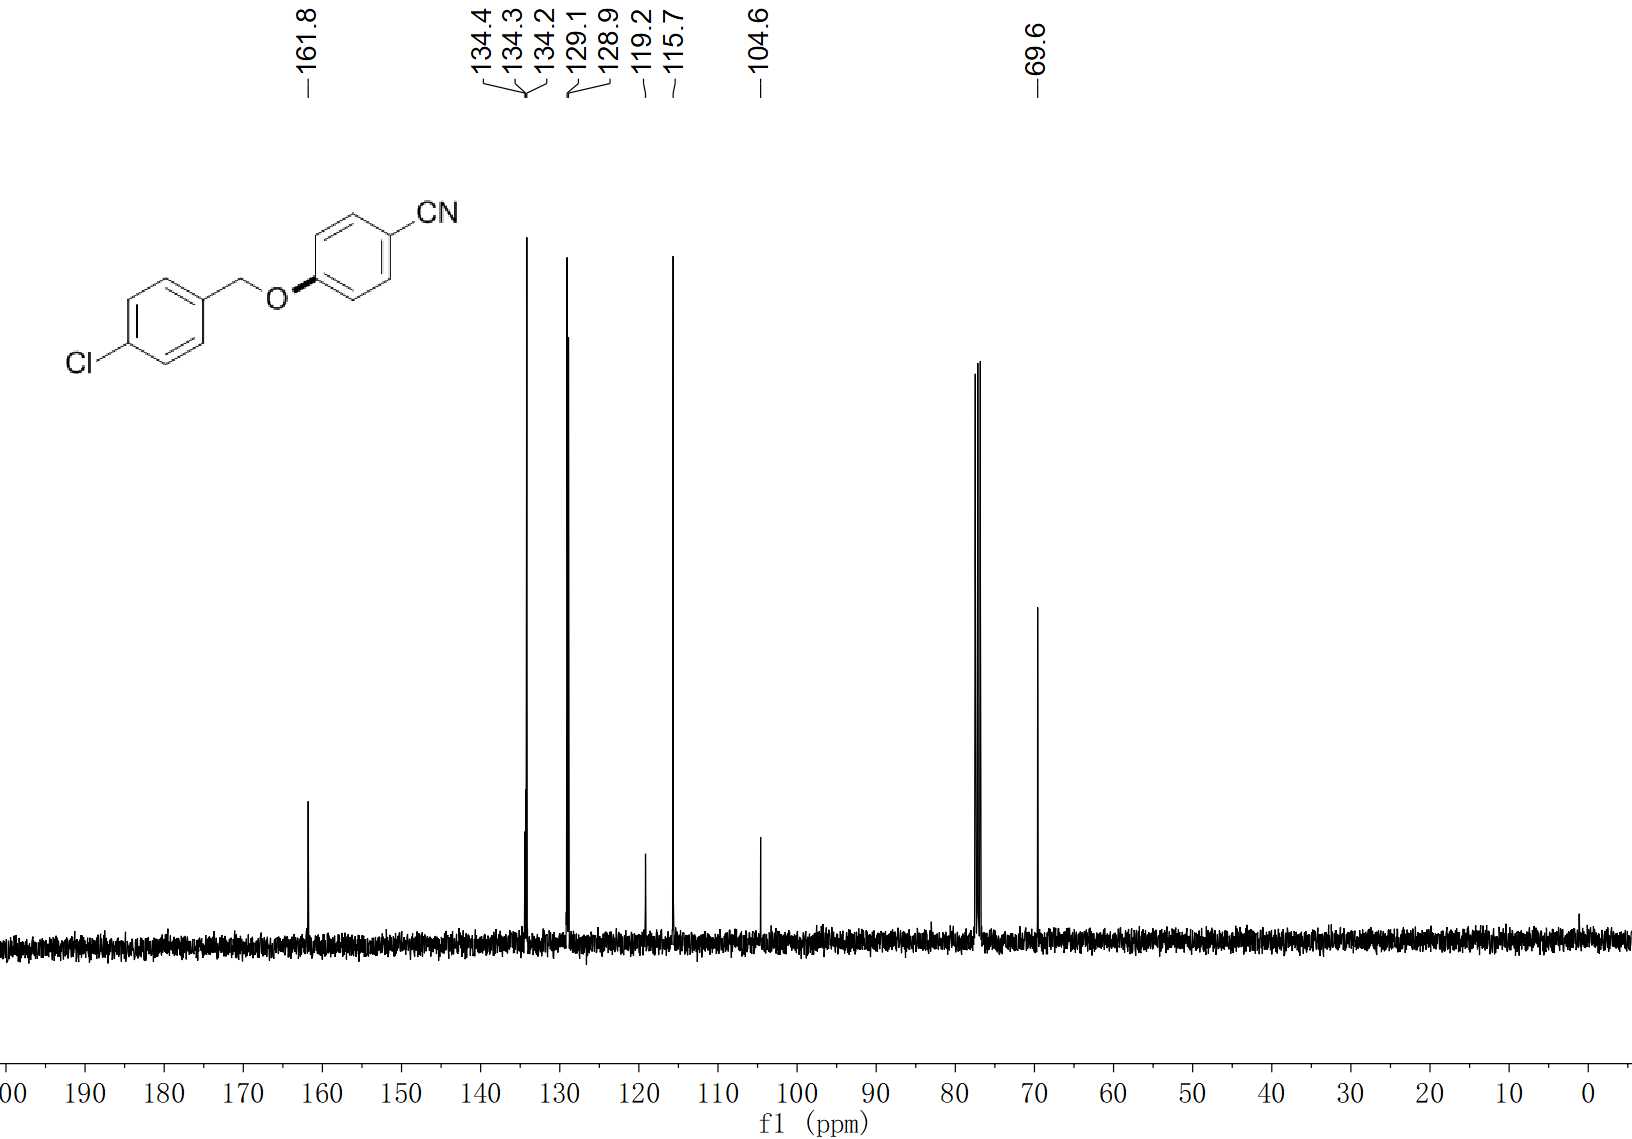


**15** 13C NMR (100 MHz, CDCl3)


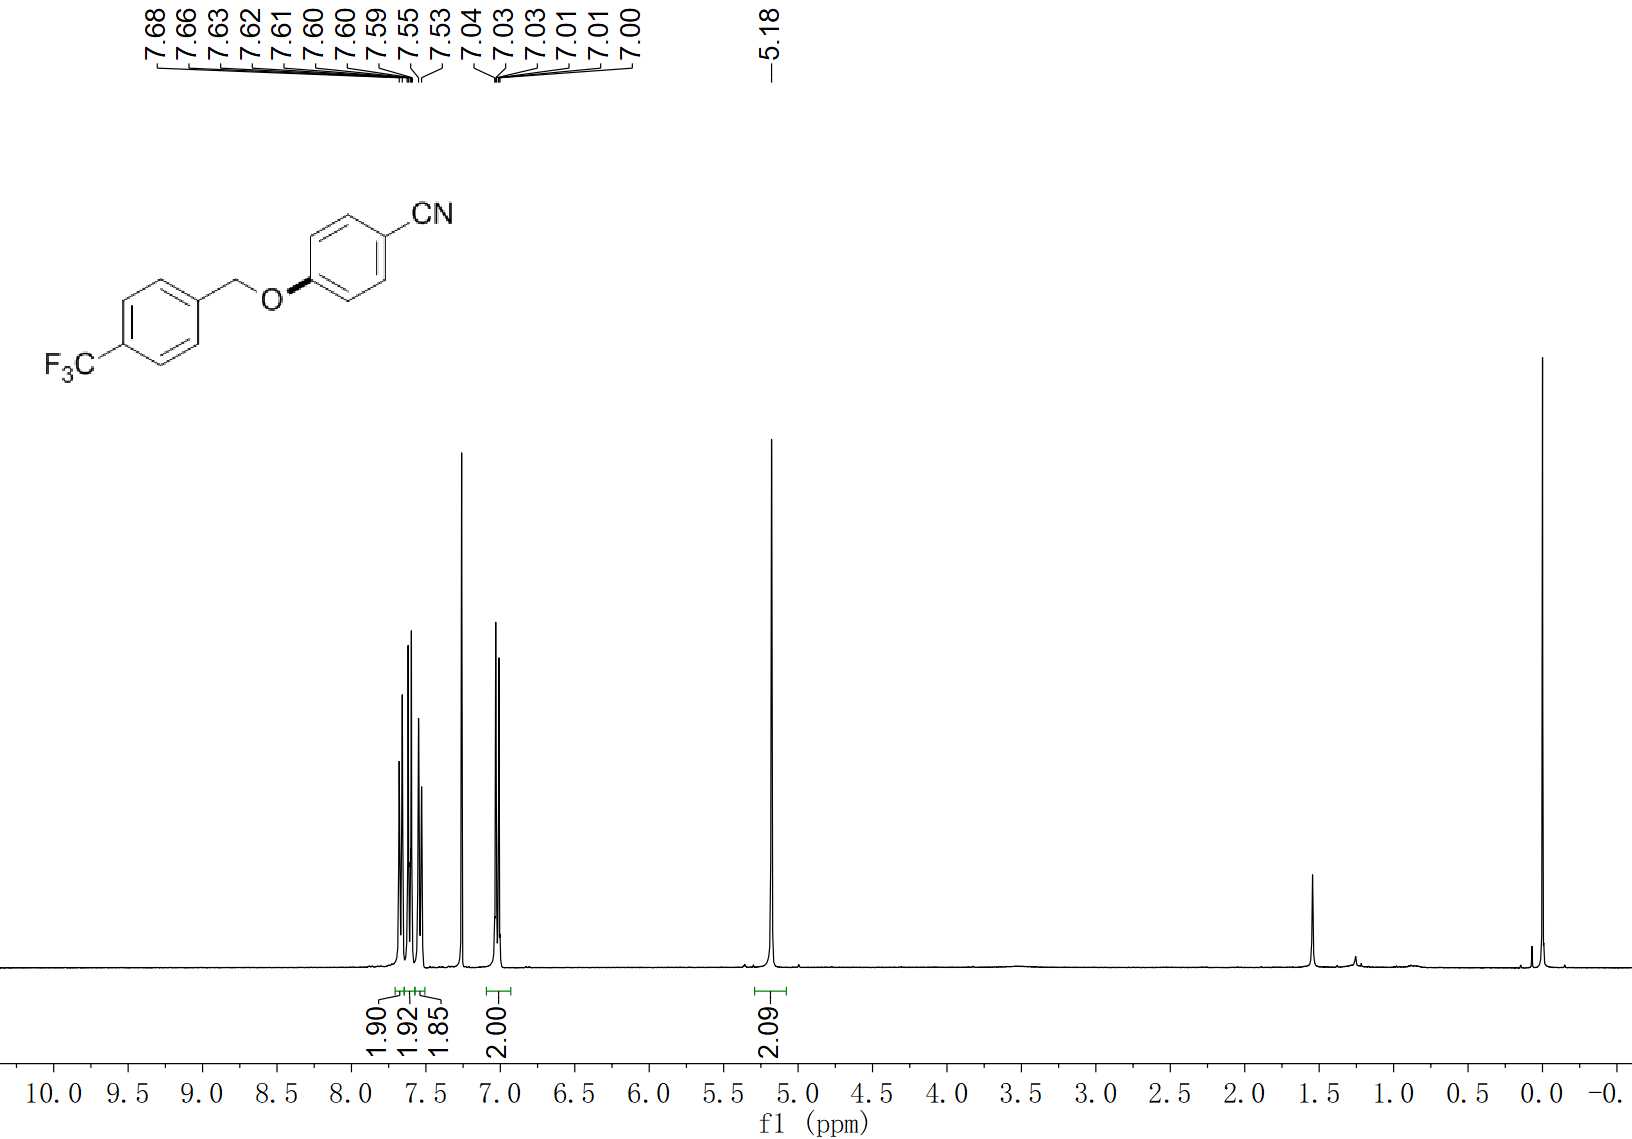


**16** 1H NMR (400 MHz, CDCl3)


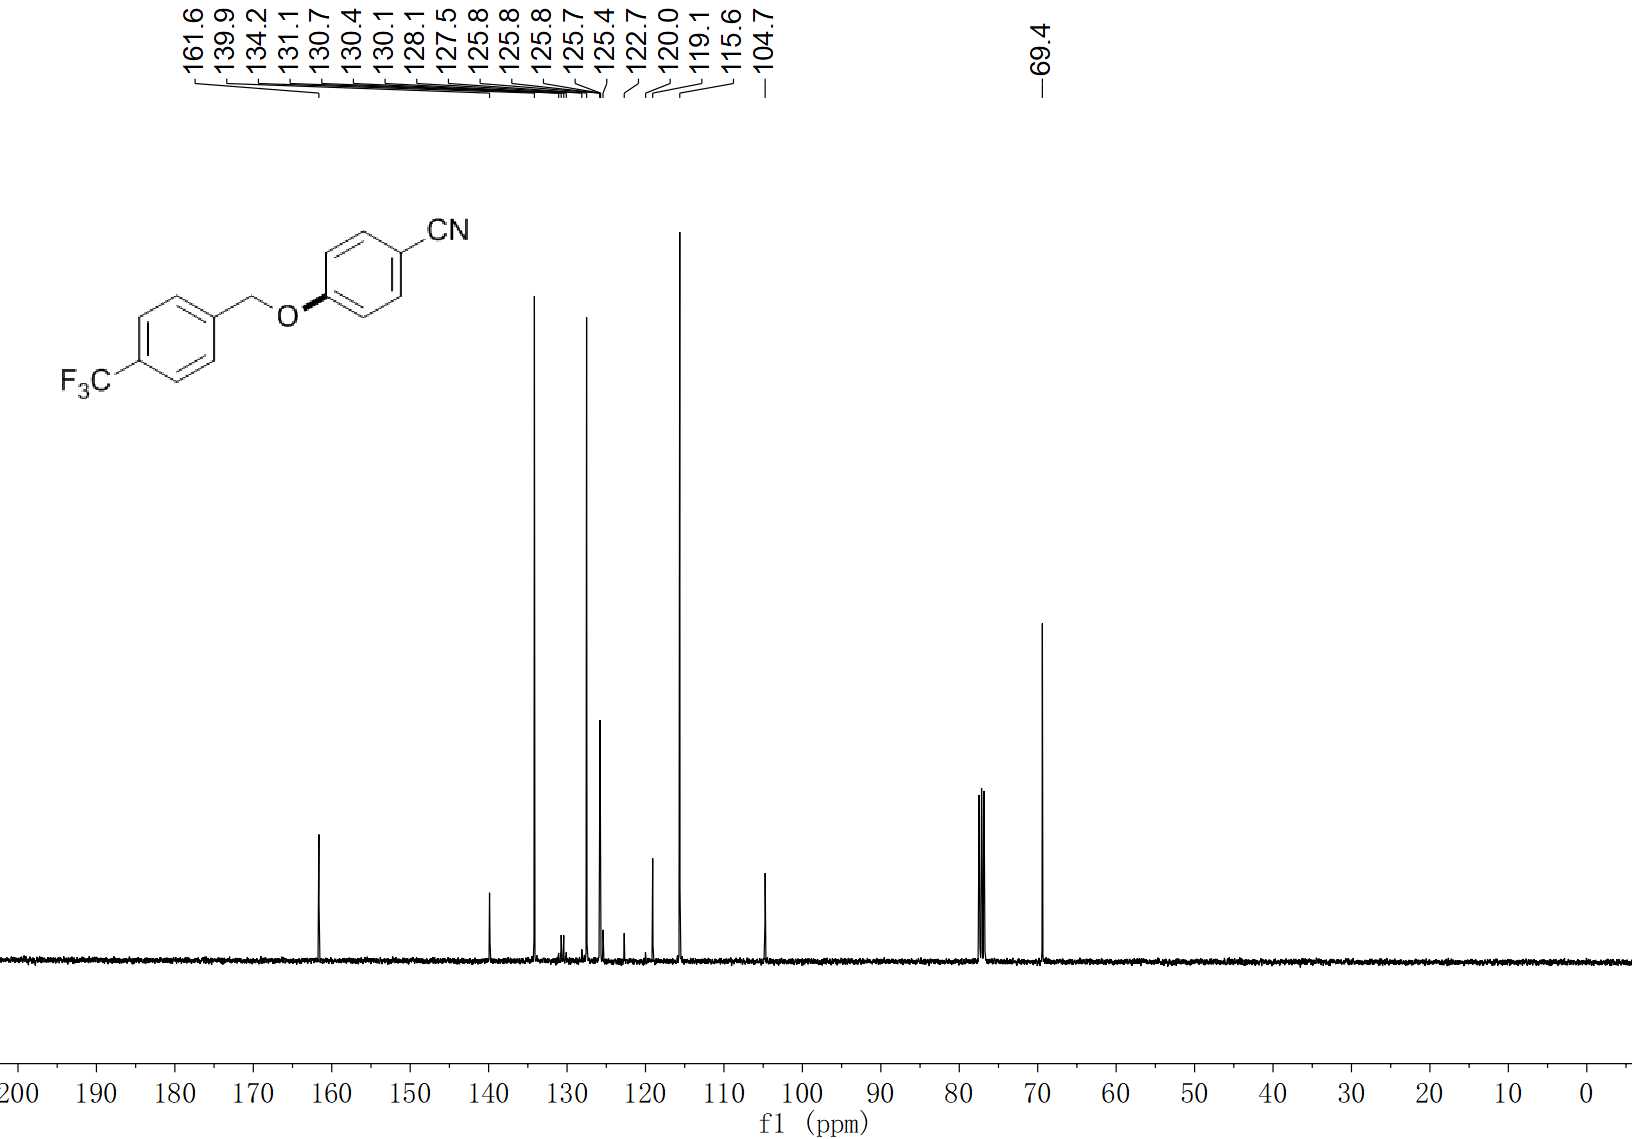


**16** 13C NMR (100 MHz, CDCl3)


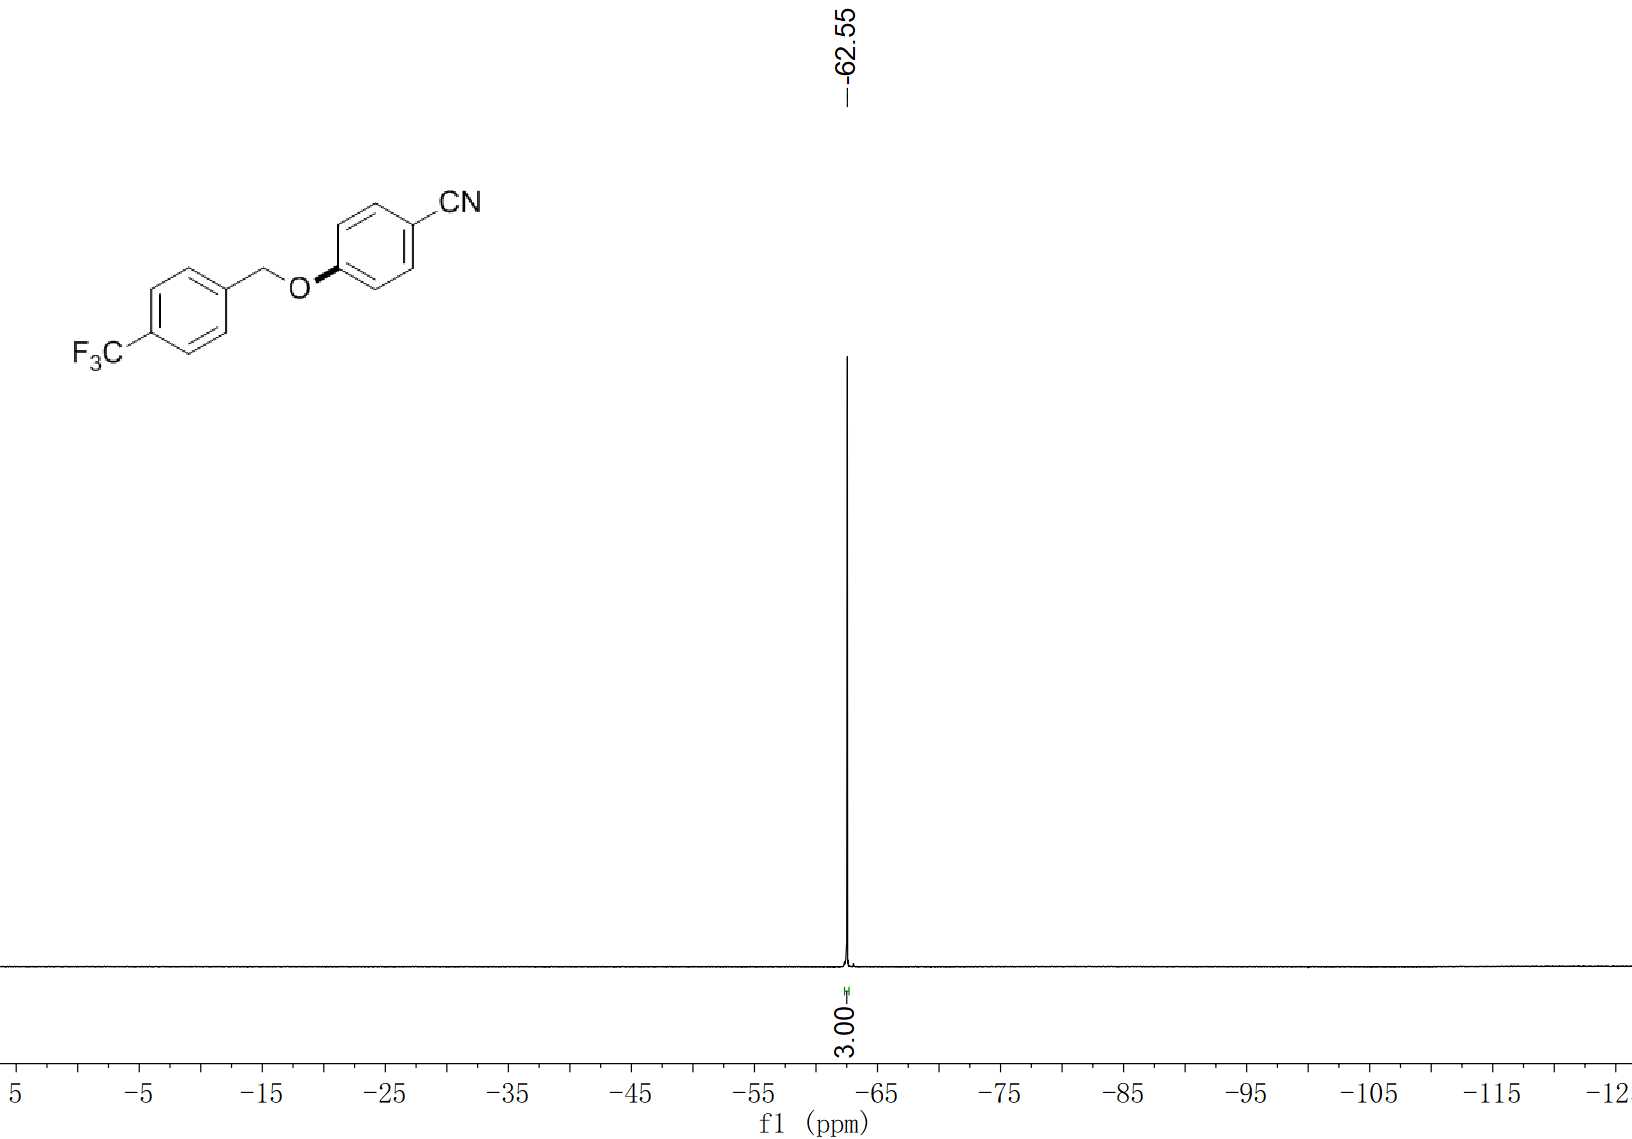


**16** 19F NMR (376 MHz, CDCl3)


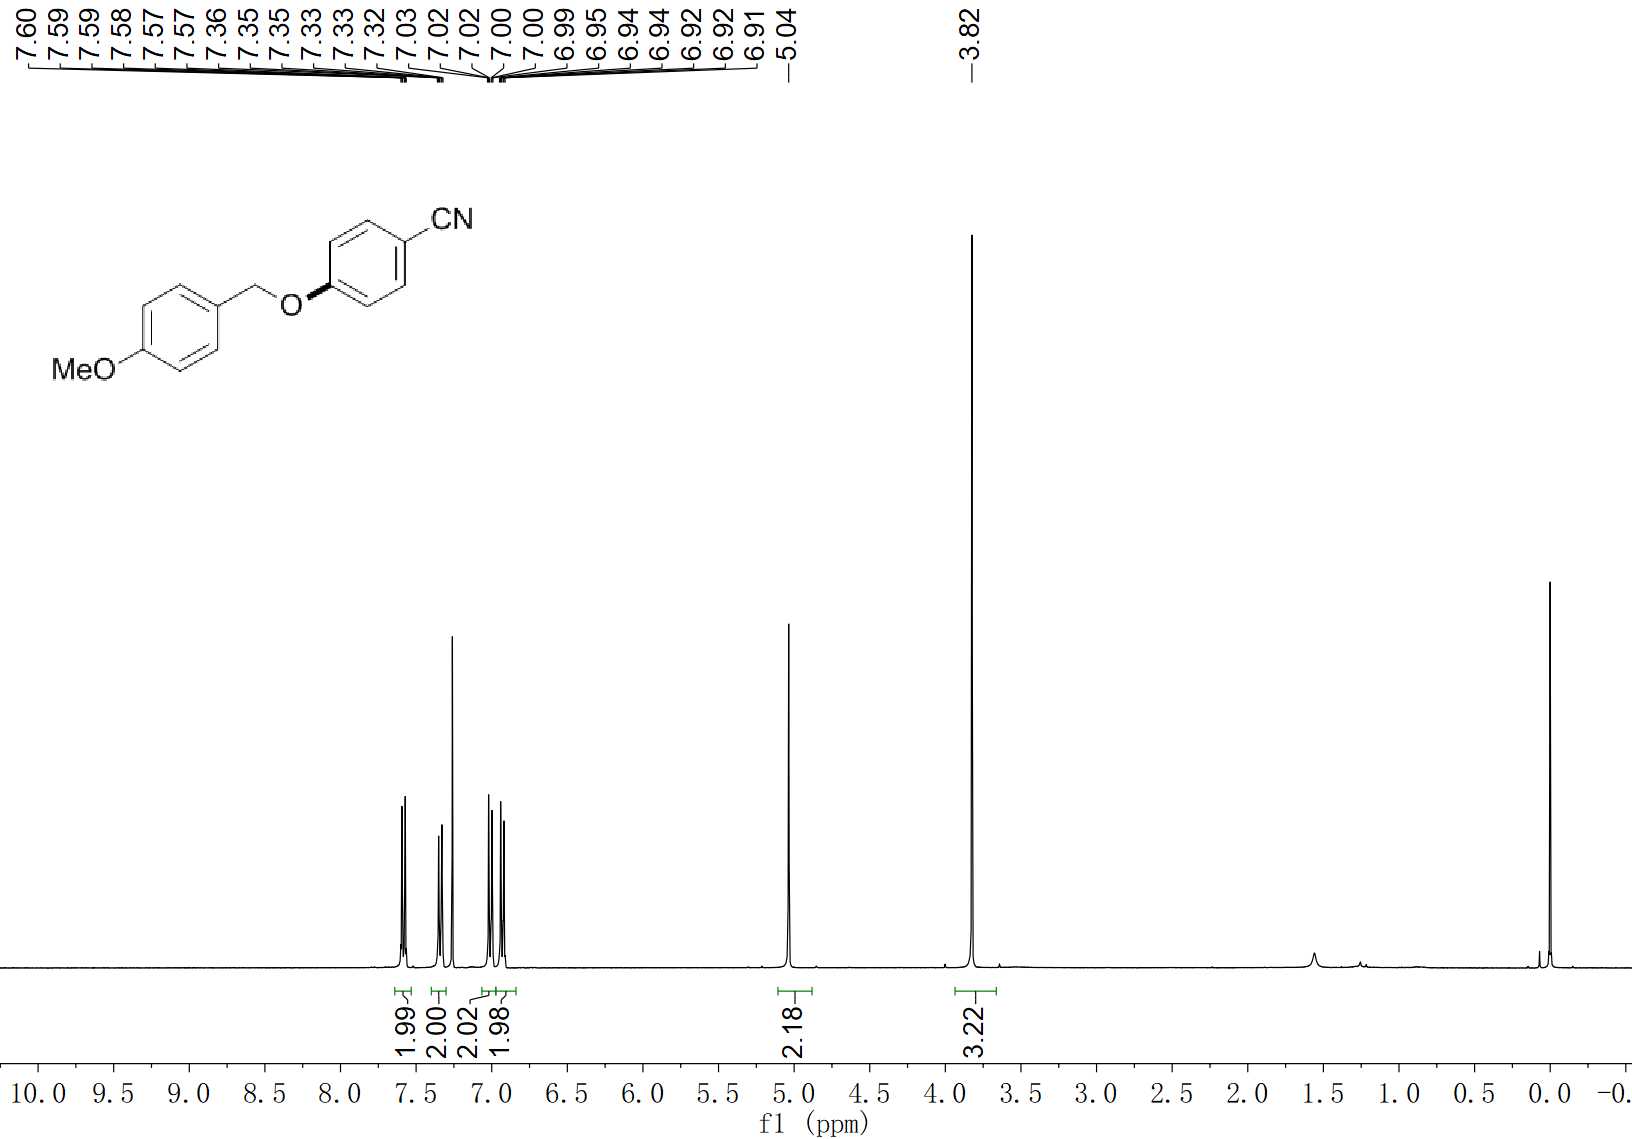


**17** 1H NMR (400 MHz, CDCl3)


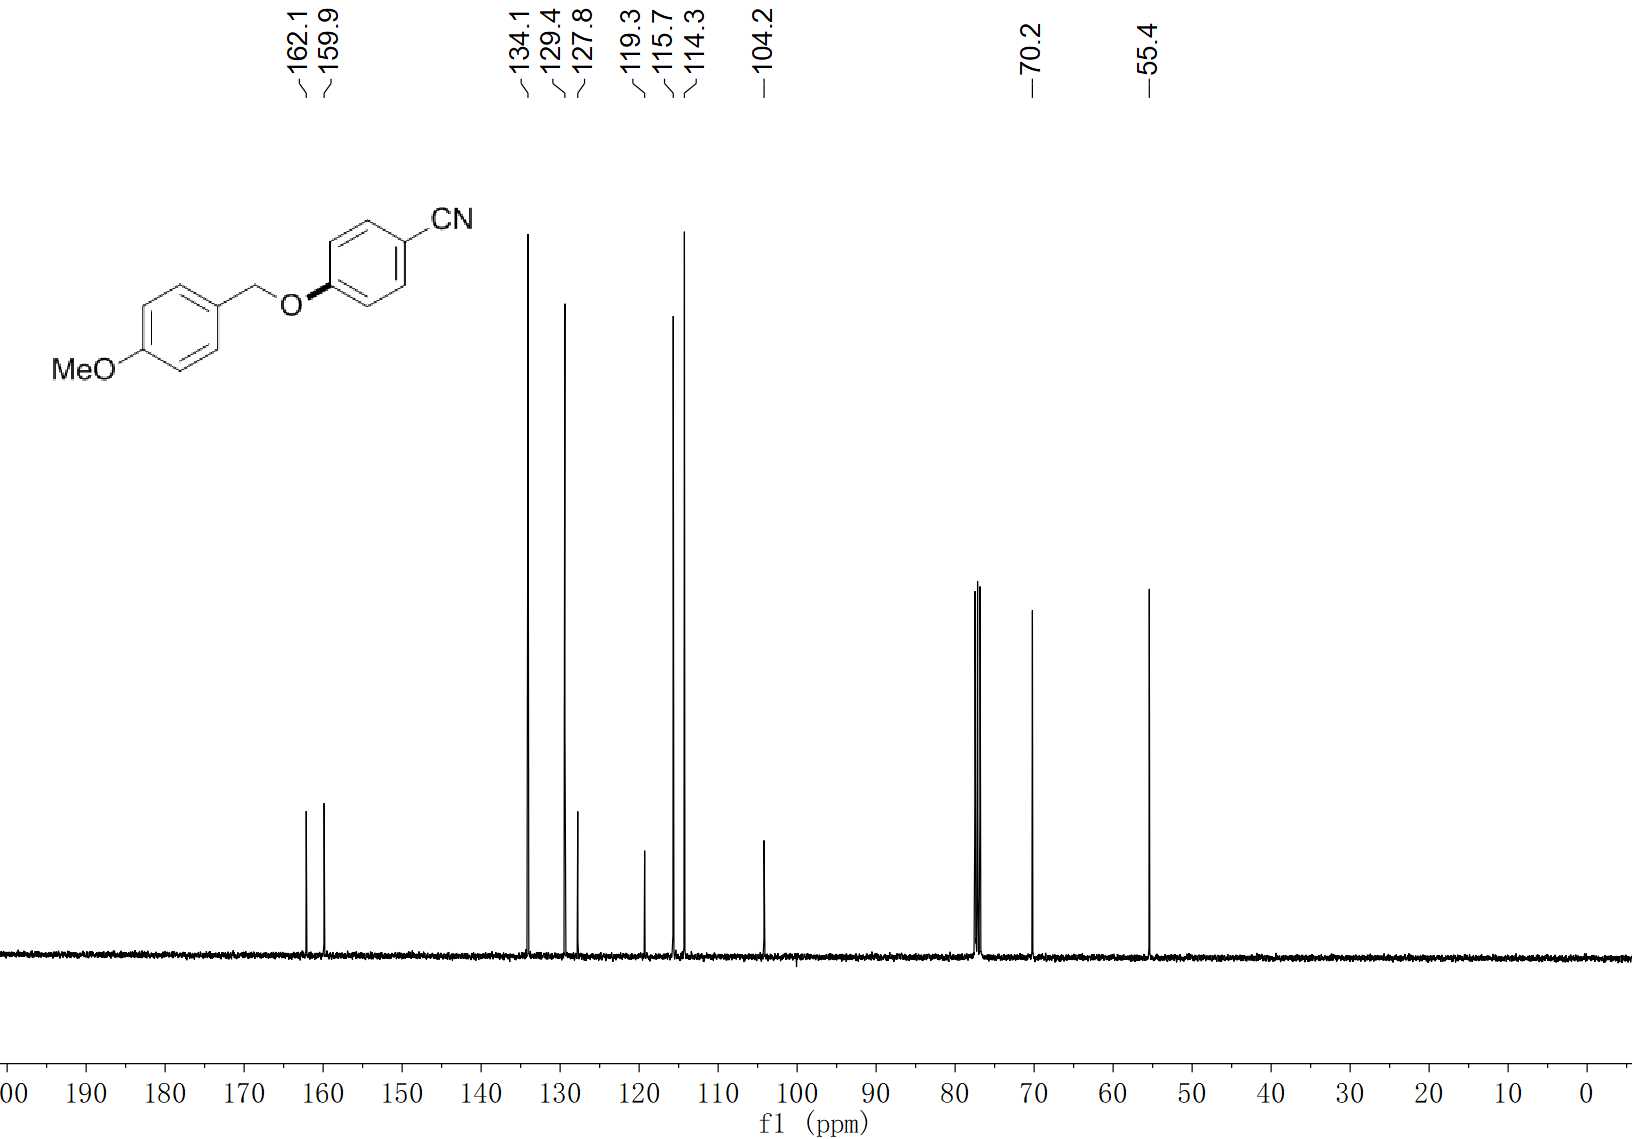


**17** 13C NMR (100 MHz, CDCl3)


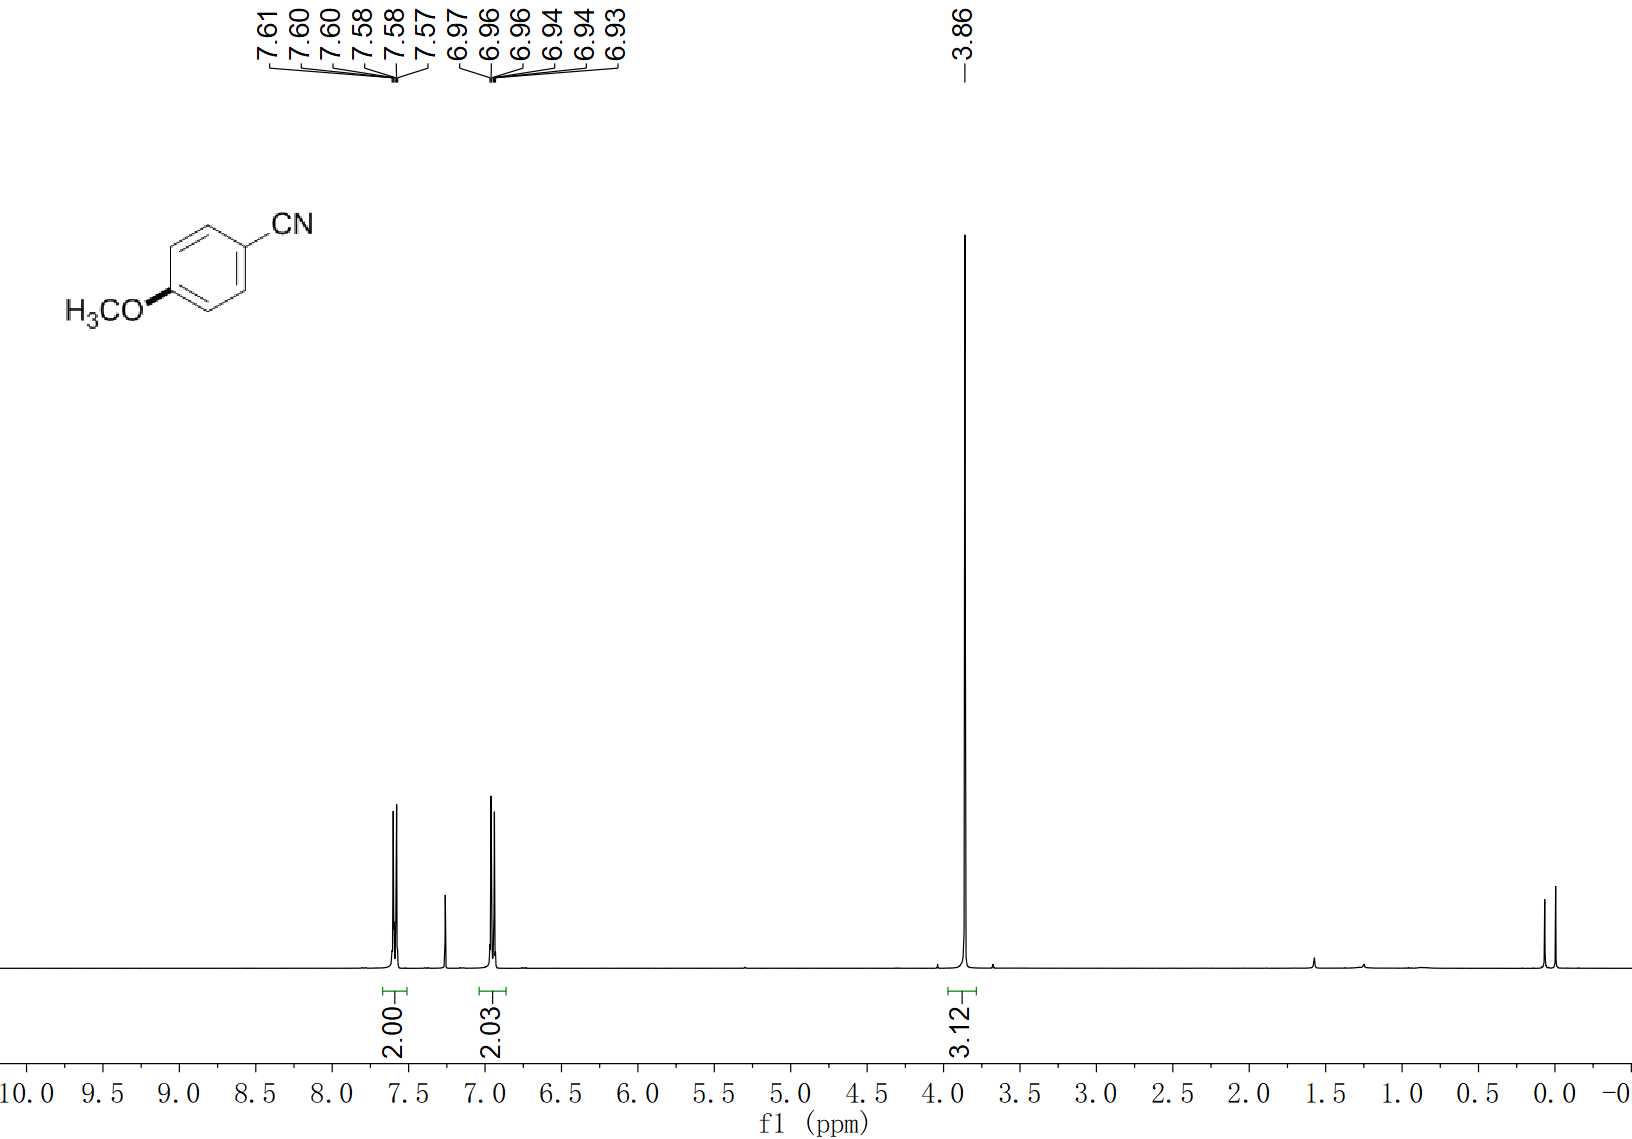


**18** 1H NMR (400 MHz, CDCl3)


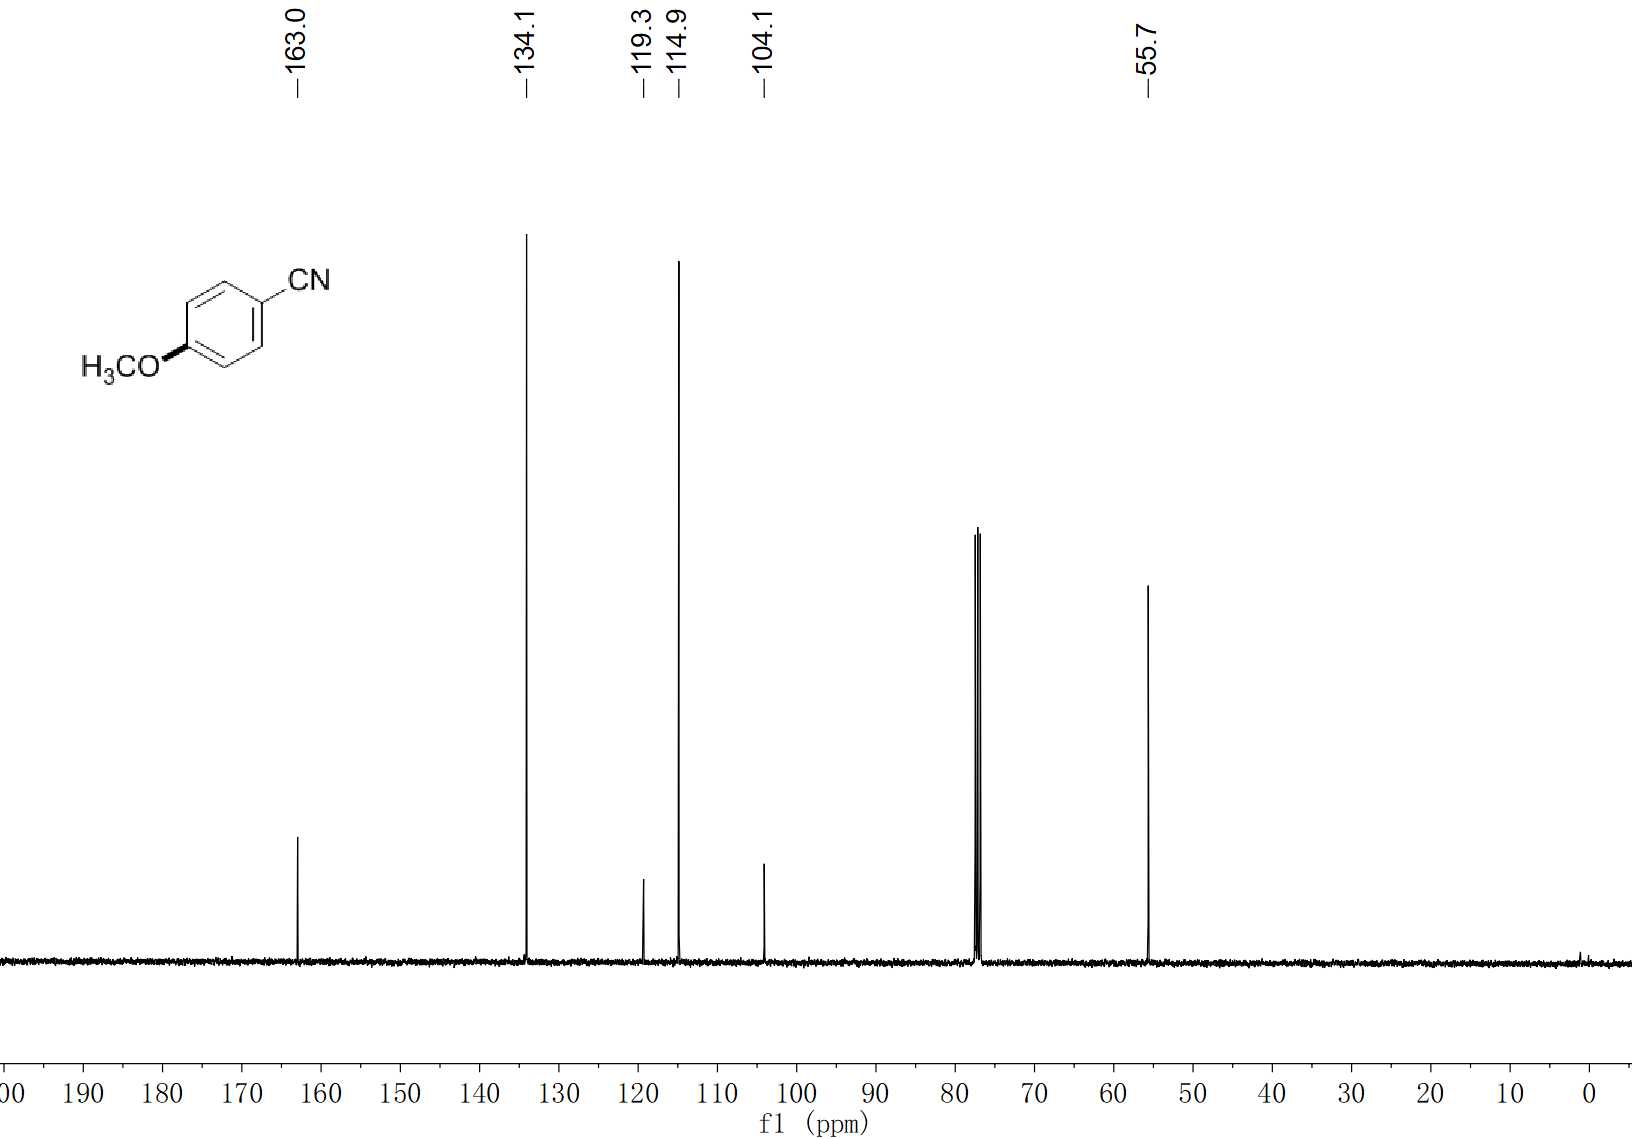


**18** 13C NMR (100 MHz, CDCl3)


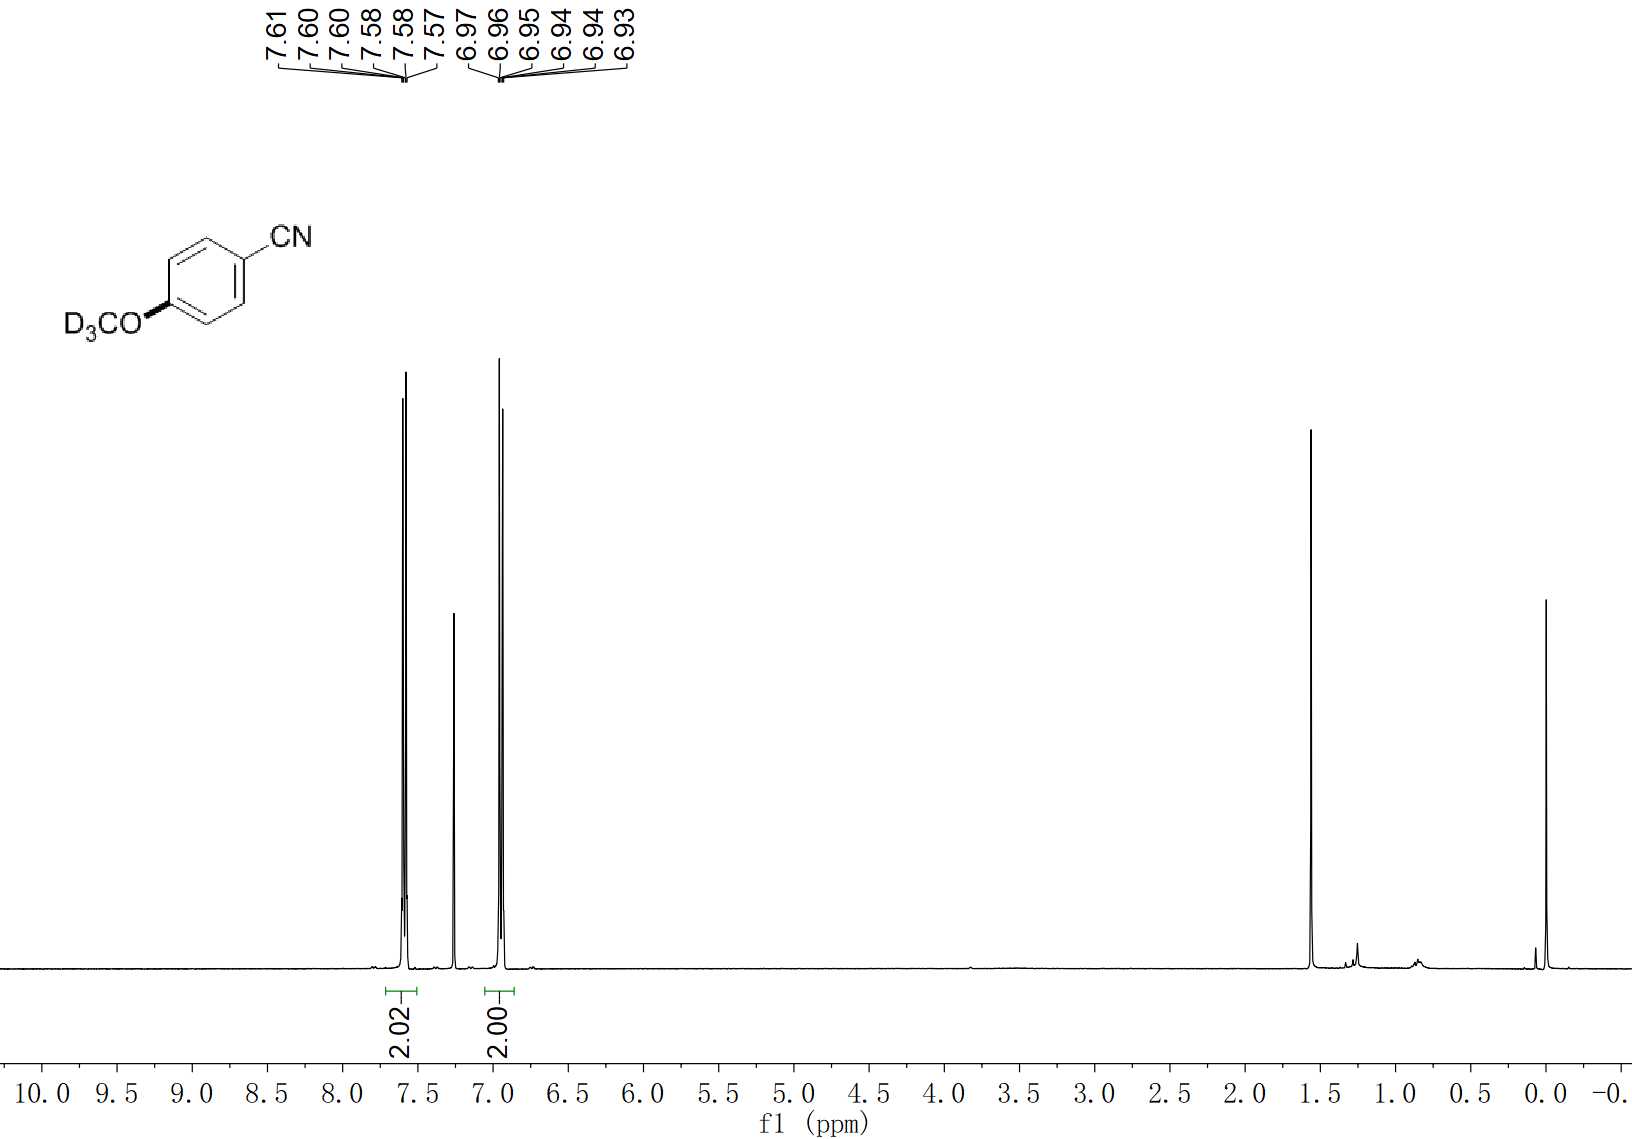


**19** 1H NMR (400 MHz, CDCl3)


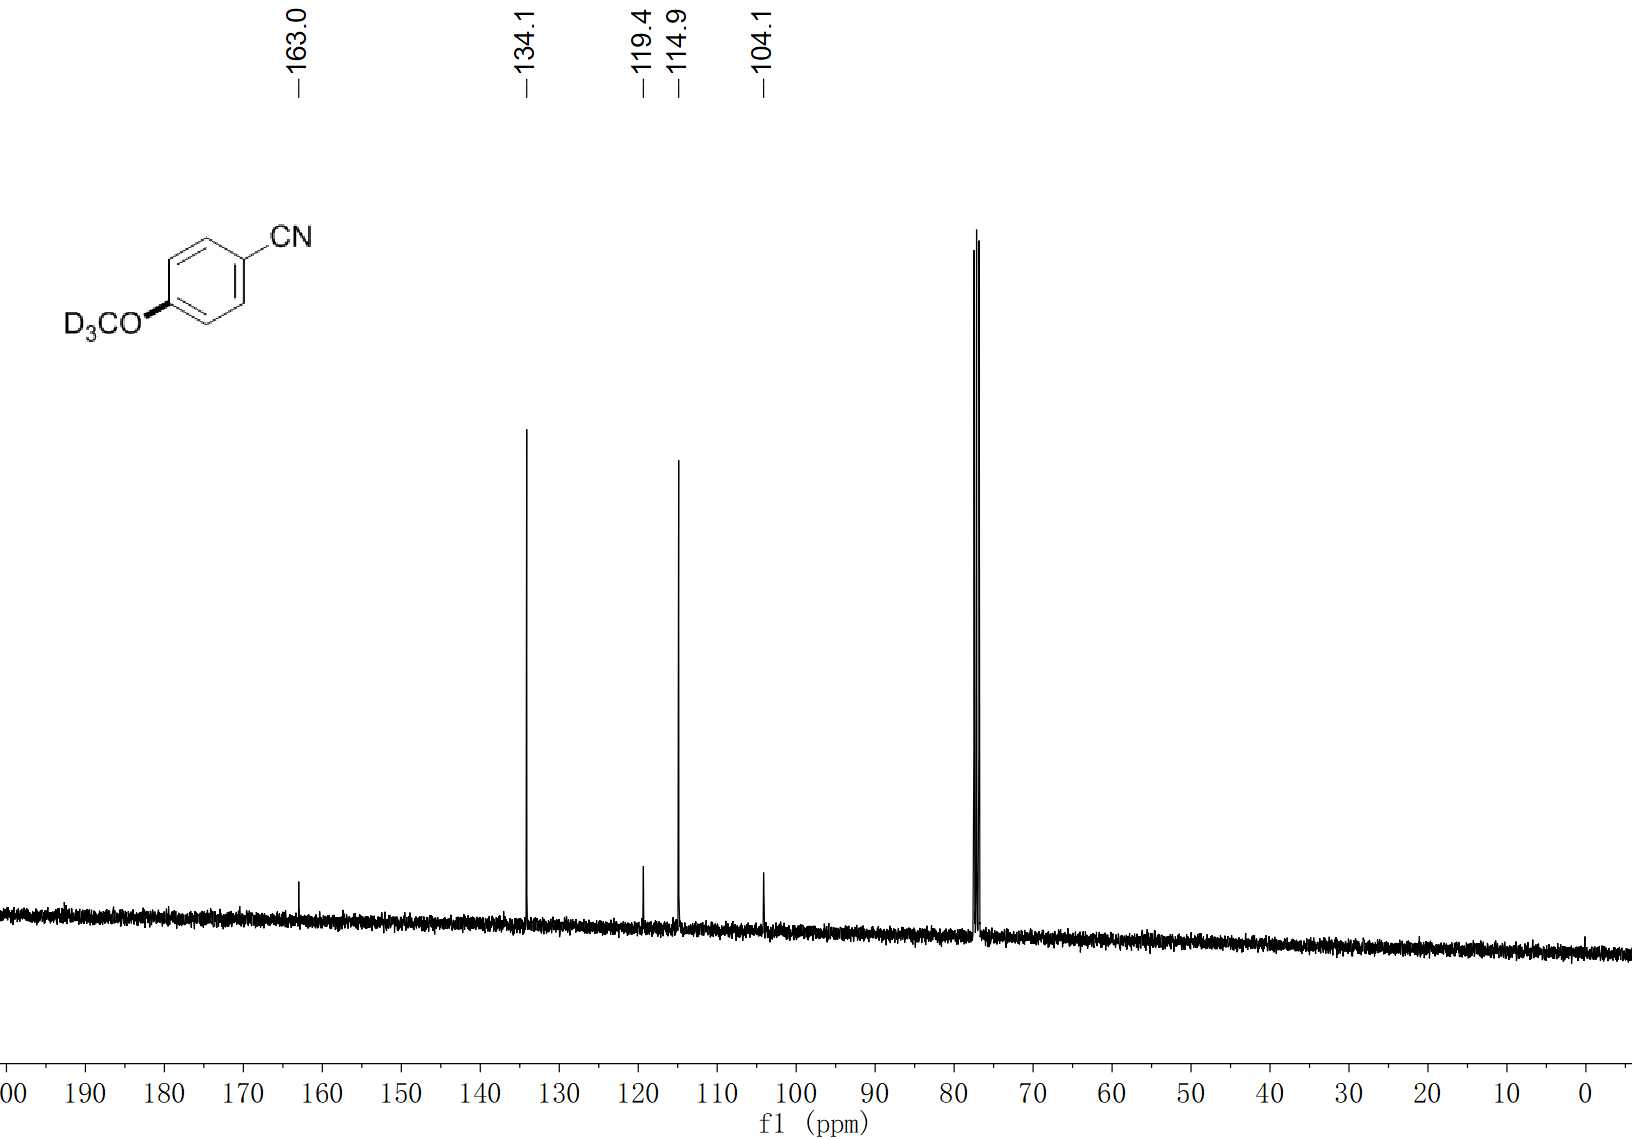


**19** 13C NMR (100 MHz, CDCl3)


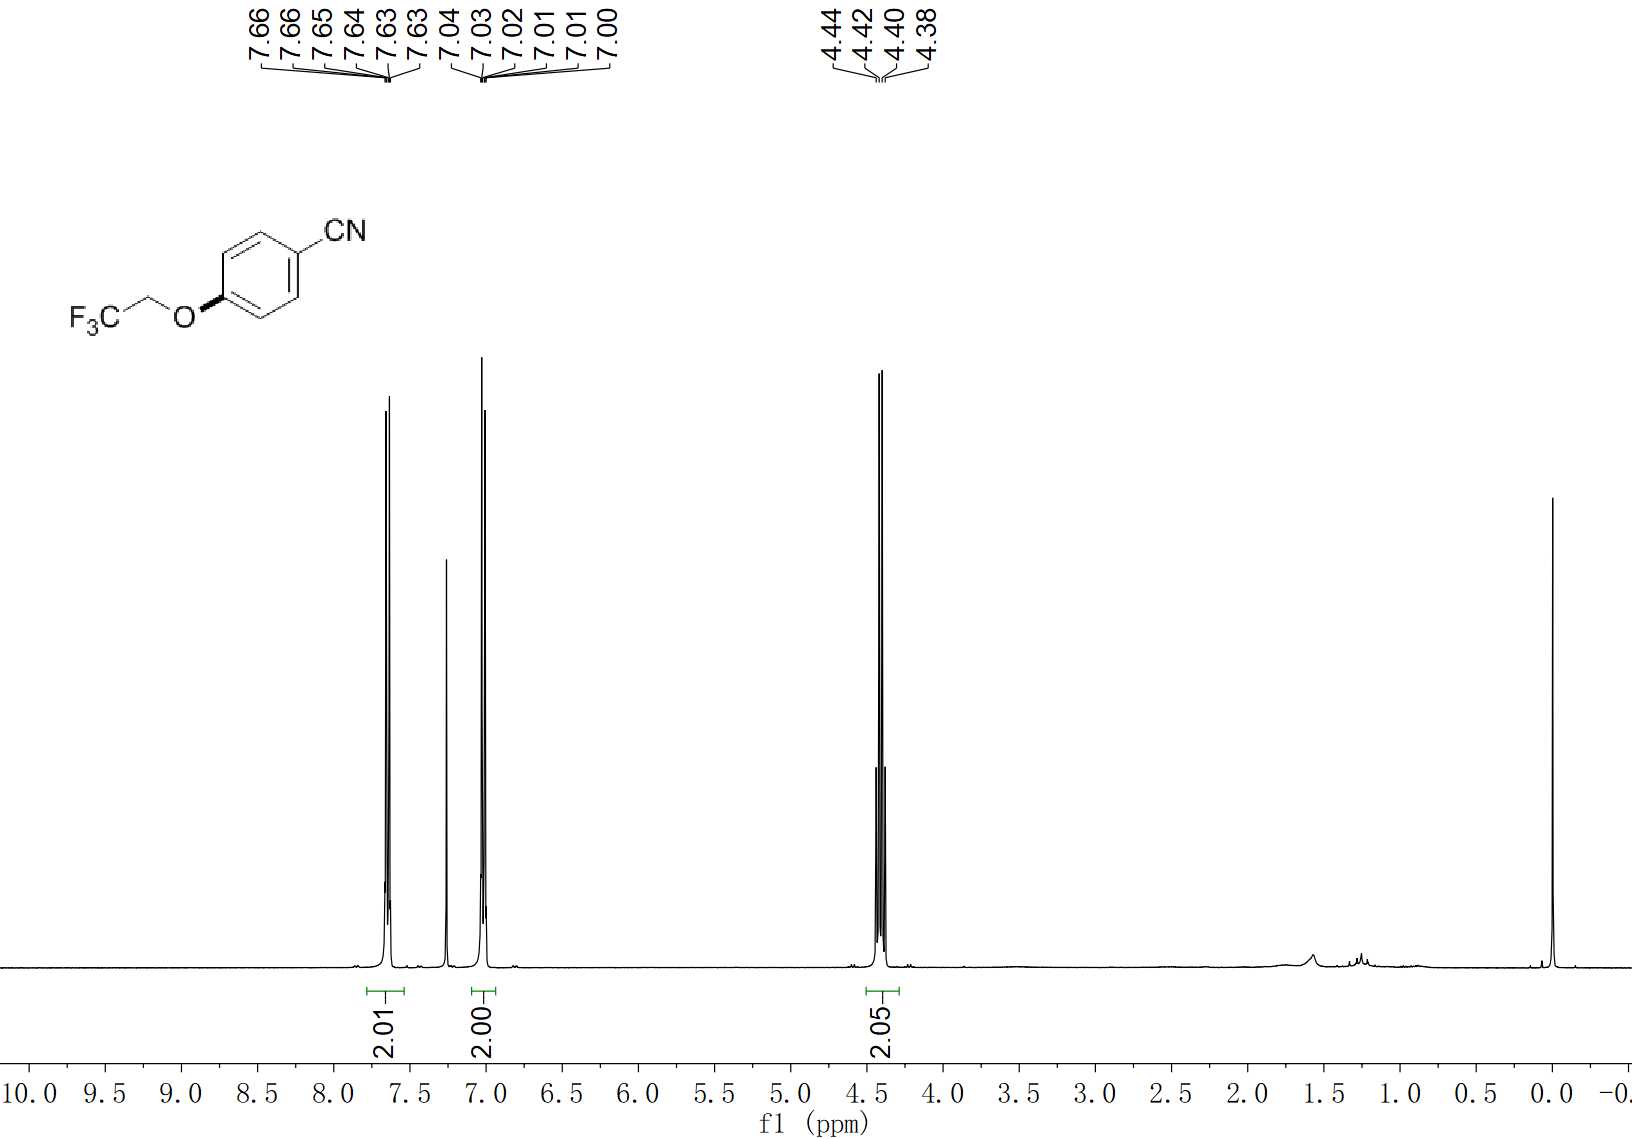


**20** 1H NMR (400 MHz, CDCl3)


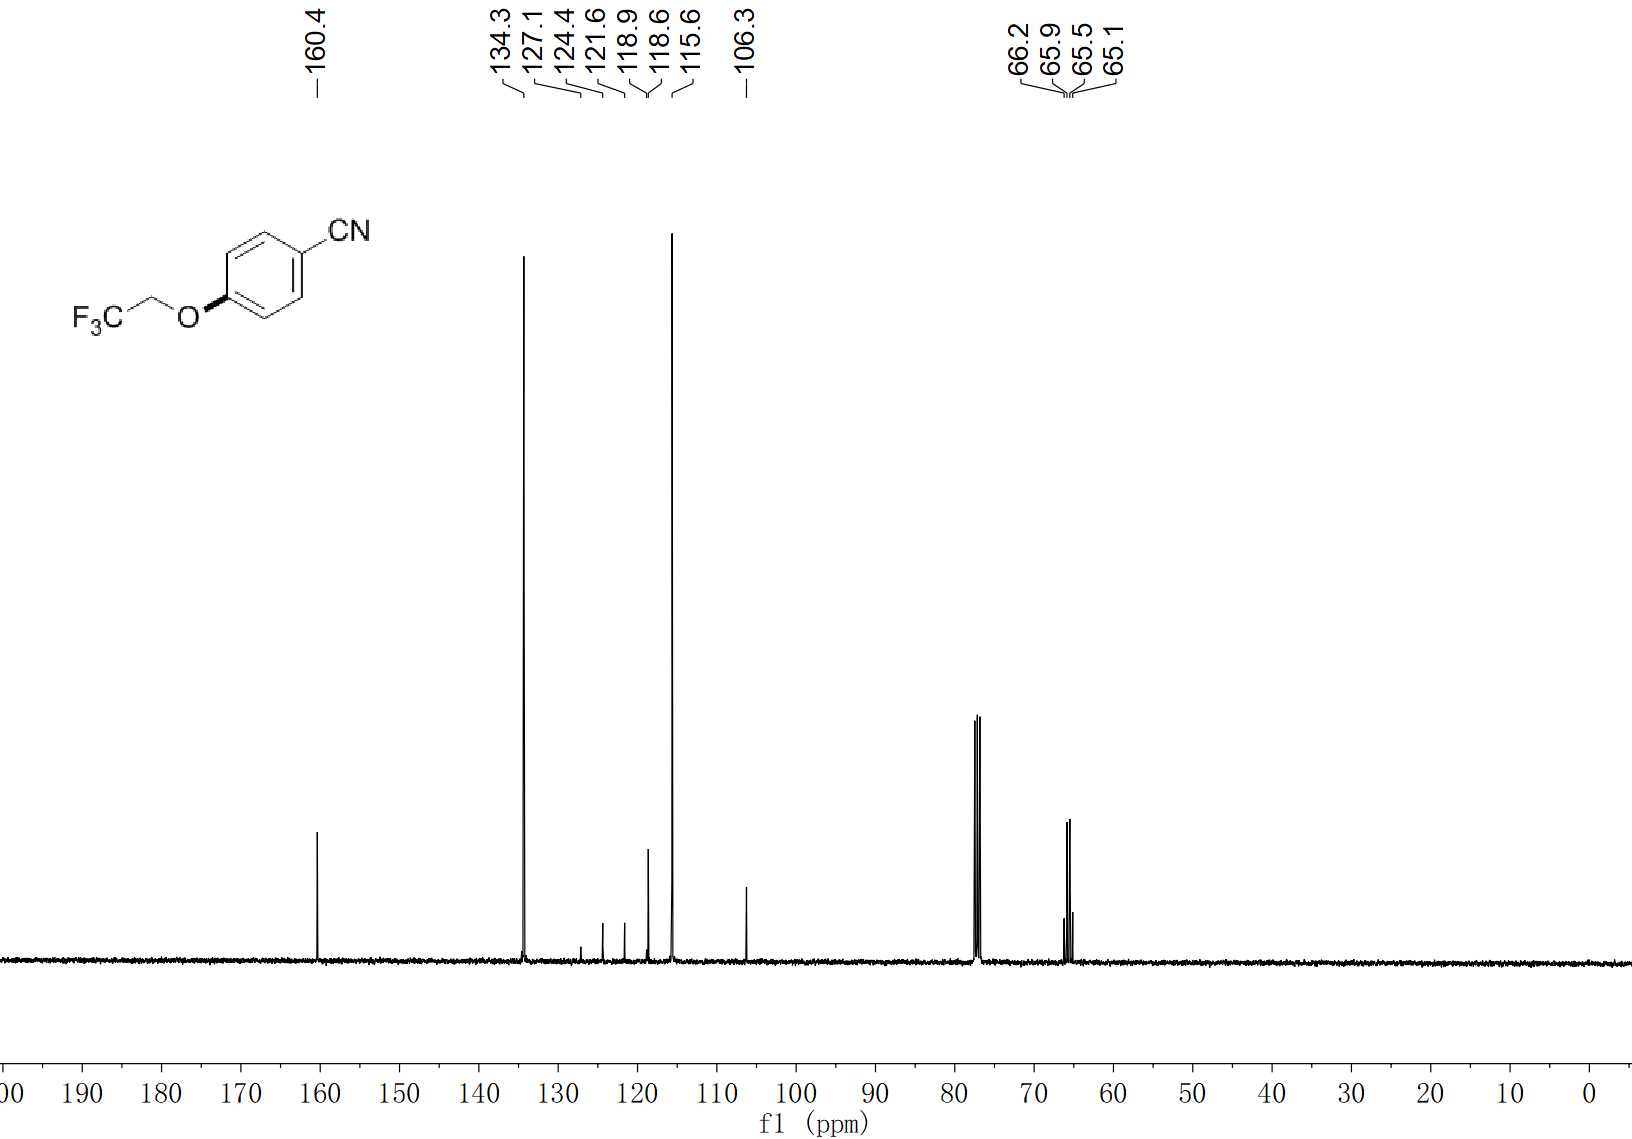


**20** 13C NMR (100 MHz, CDCl3)


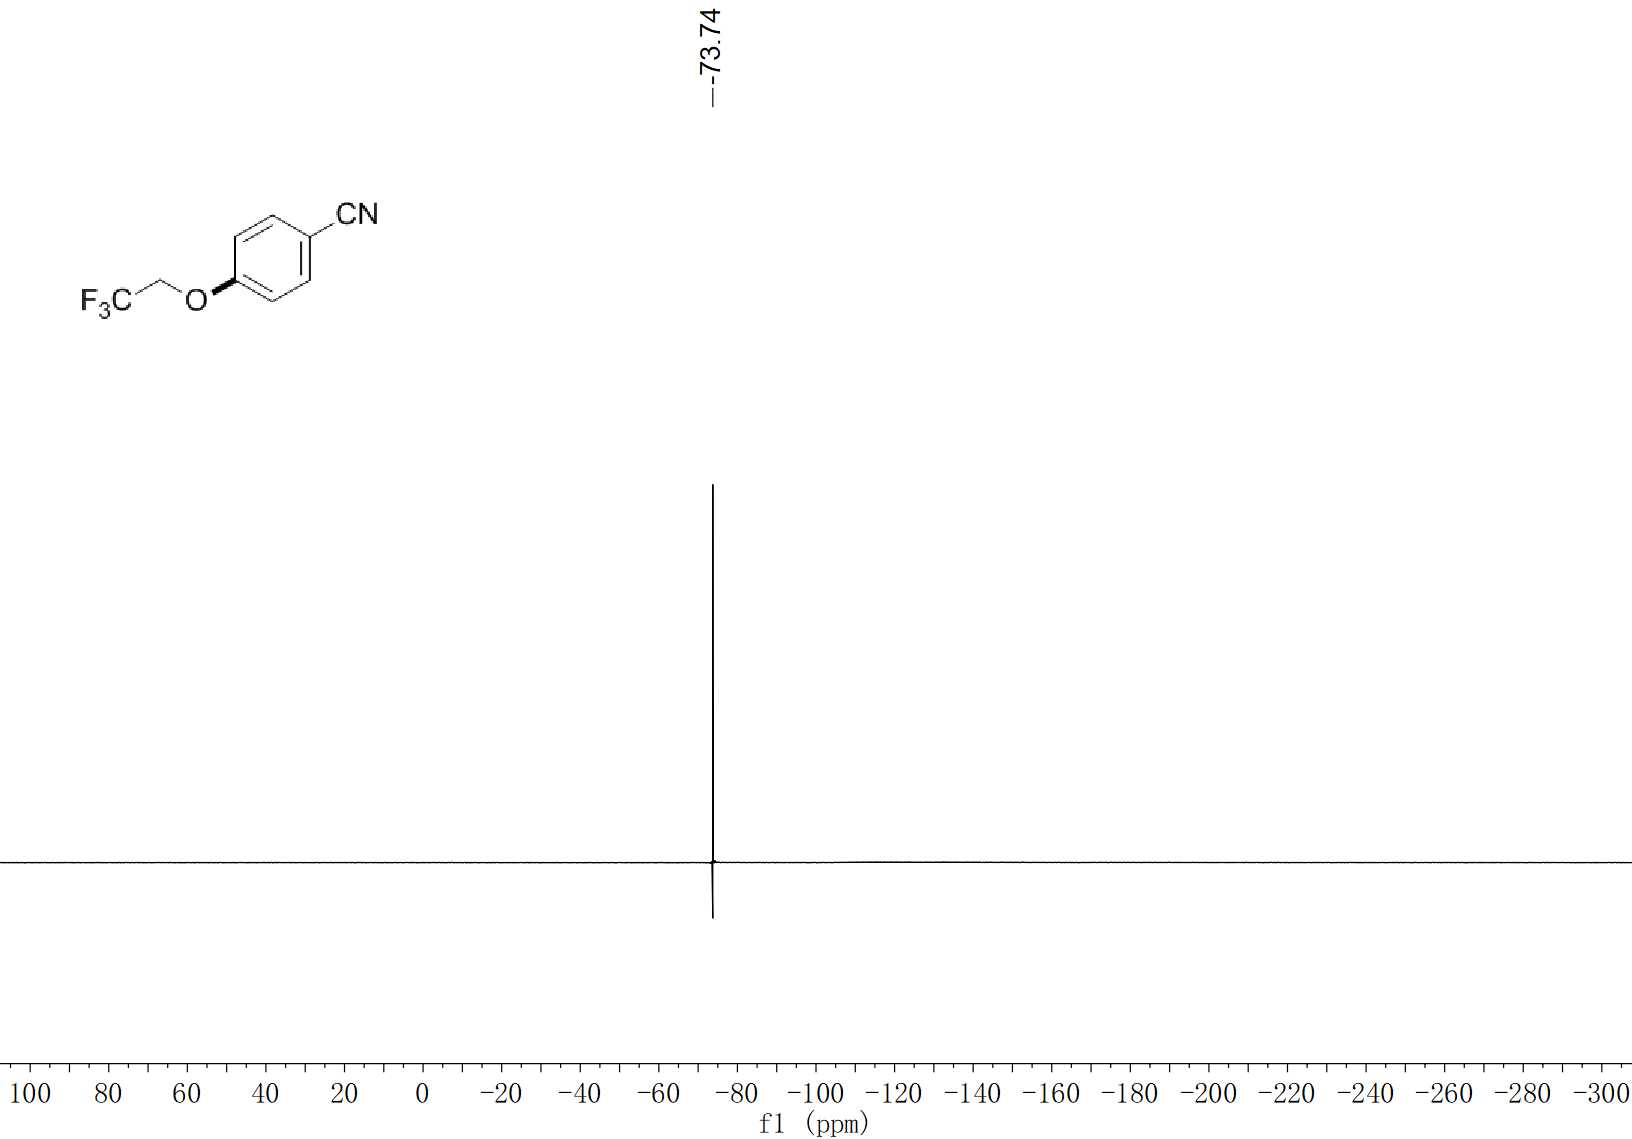


**20** 19F NMR (376 MHz, CDCl3)


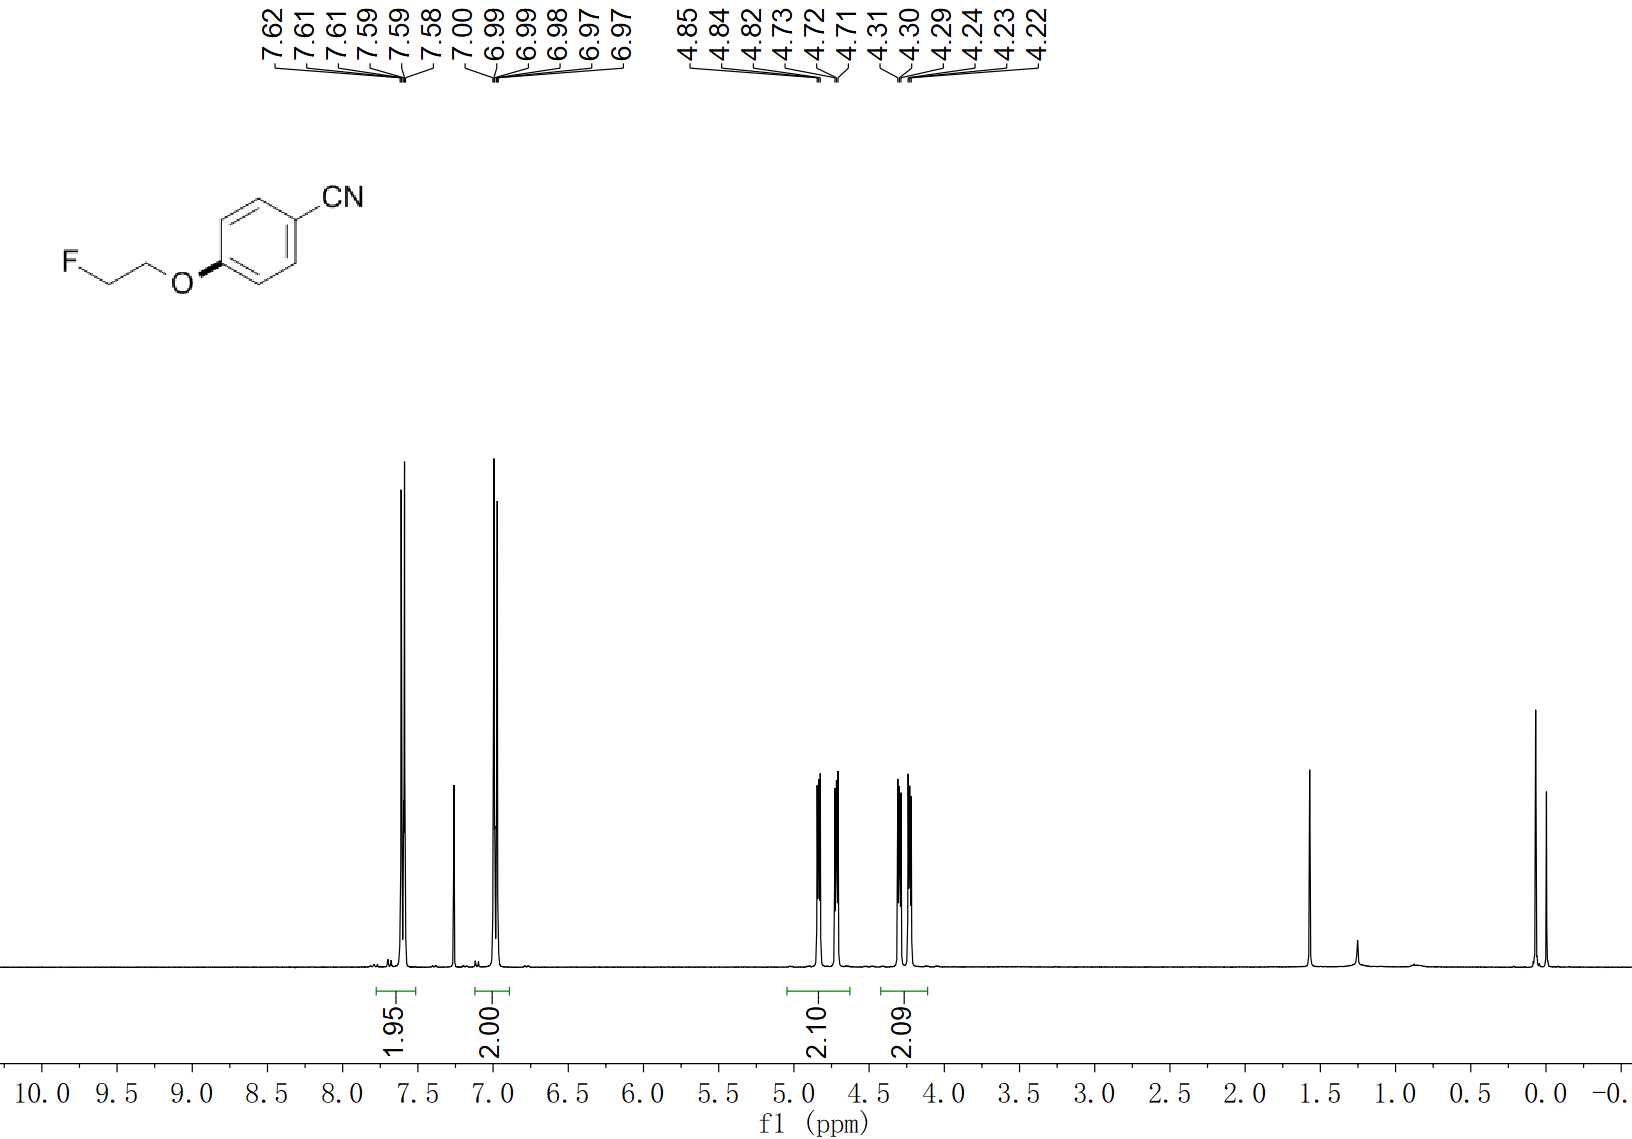


**21** 1H NMR (400 MHz, CDCl3)


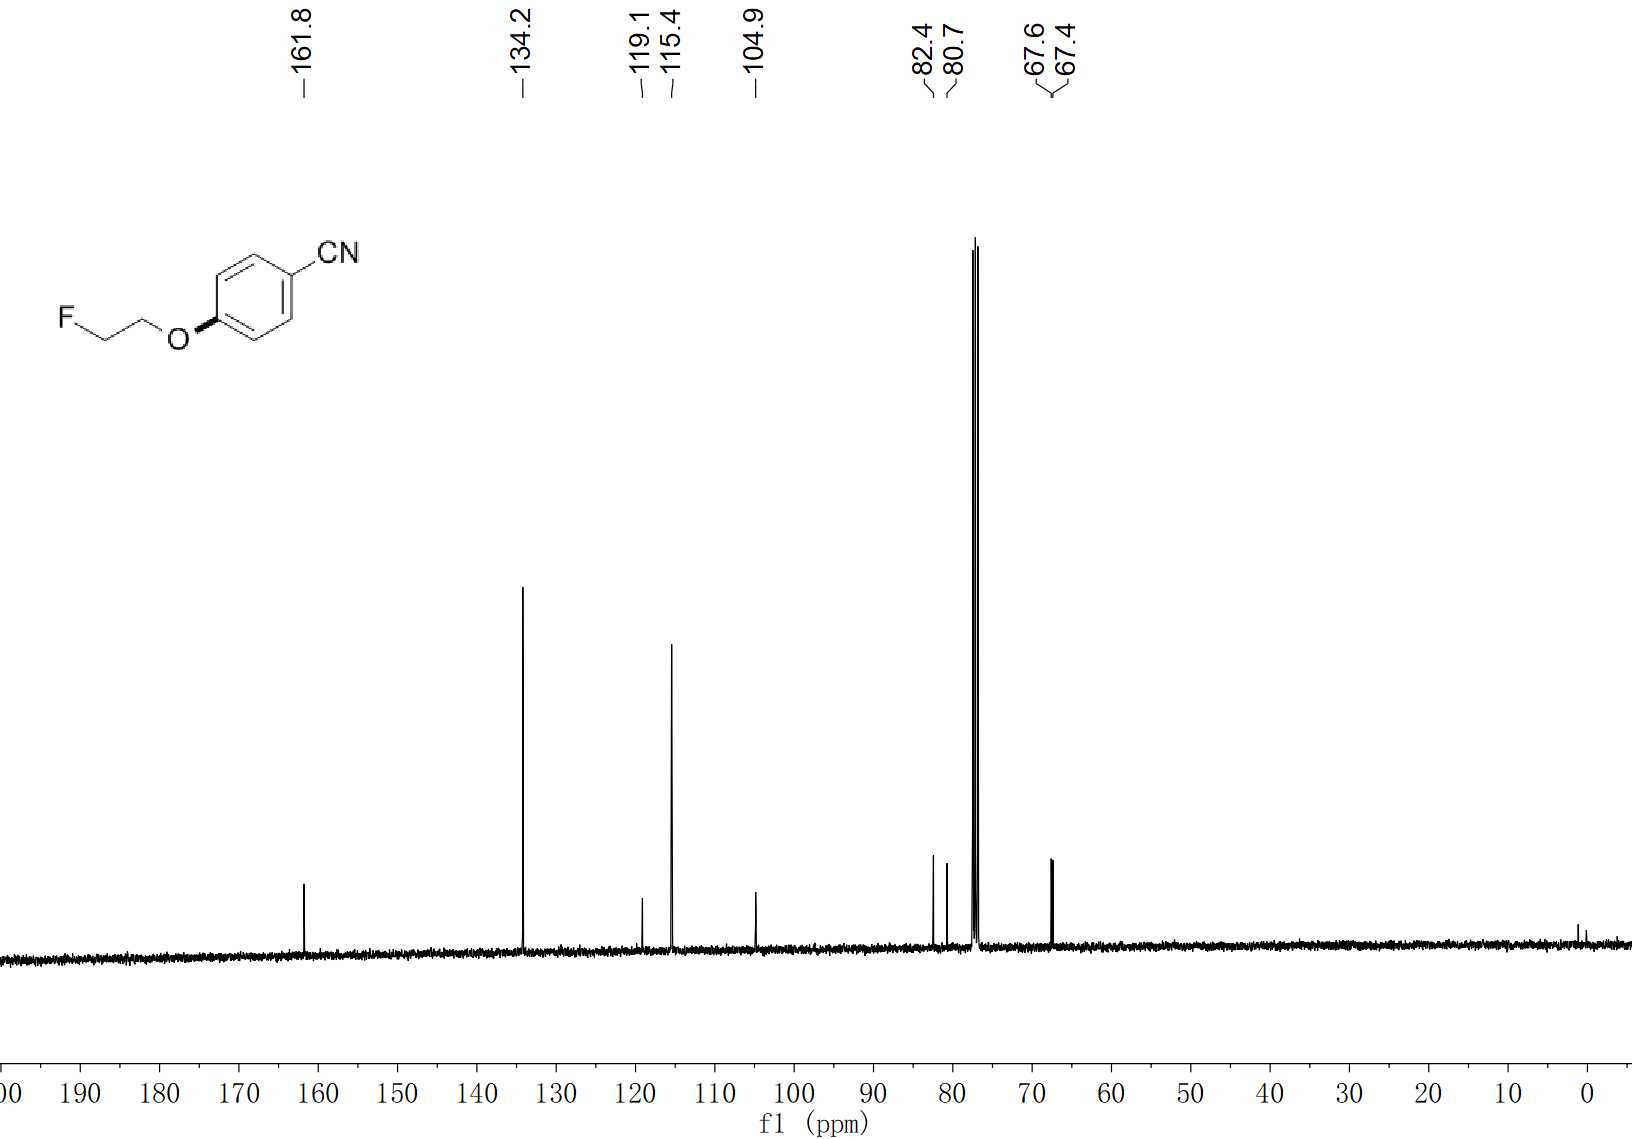


**21** 13C NMR (100 MHz, CDCl3)


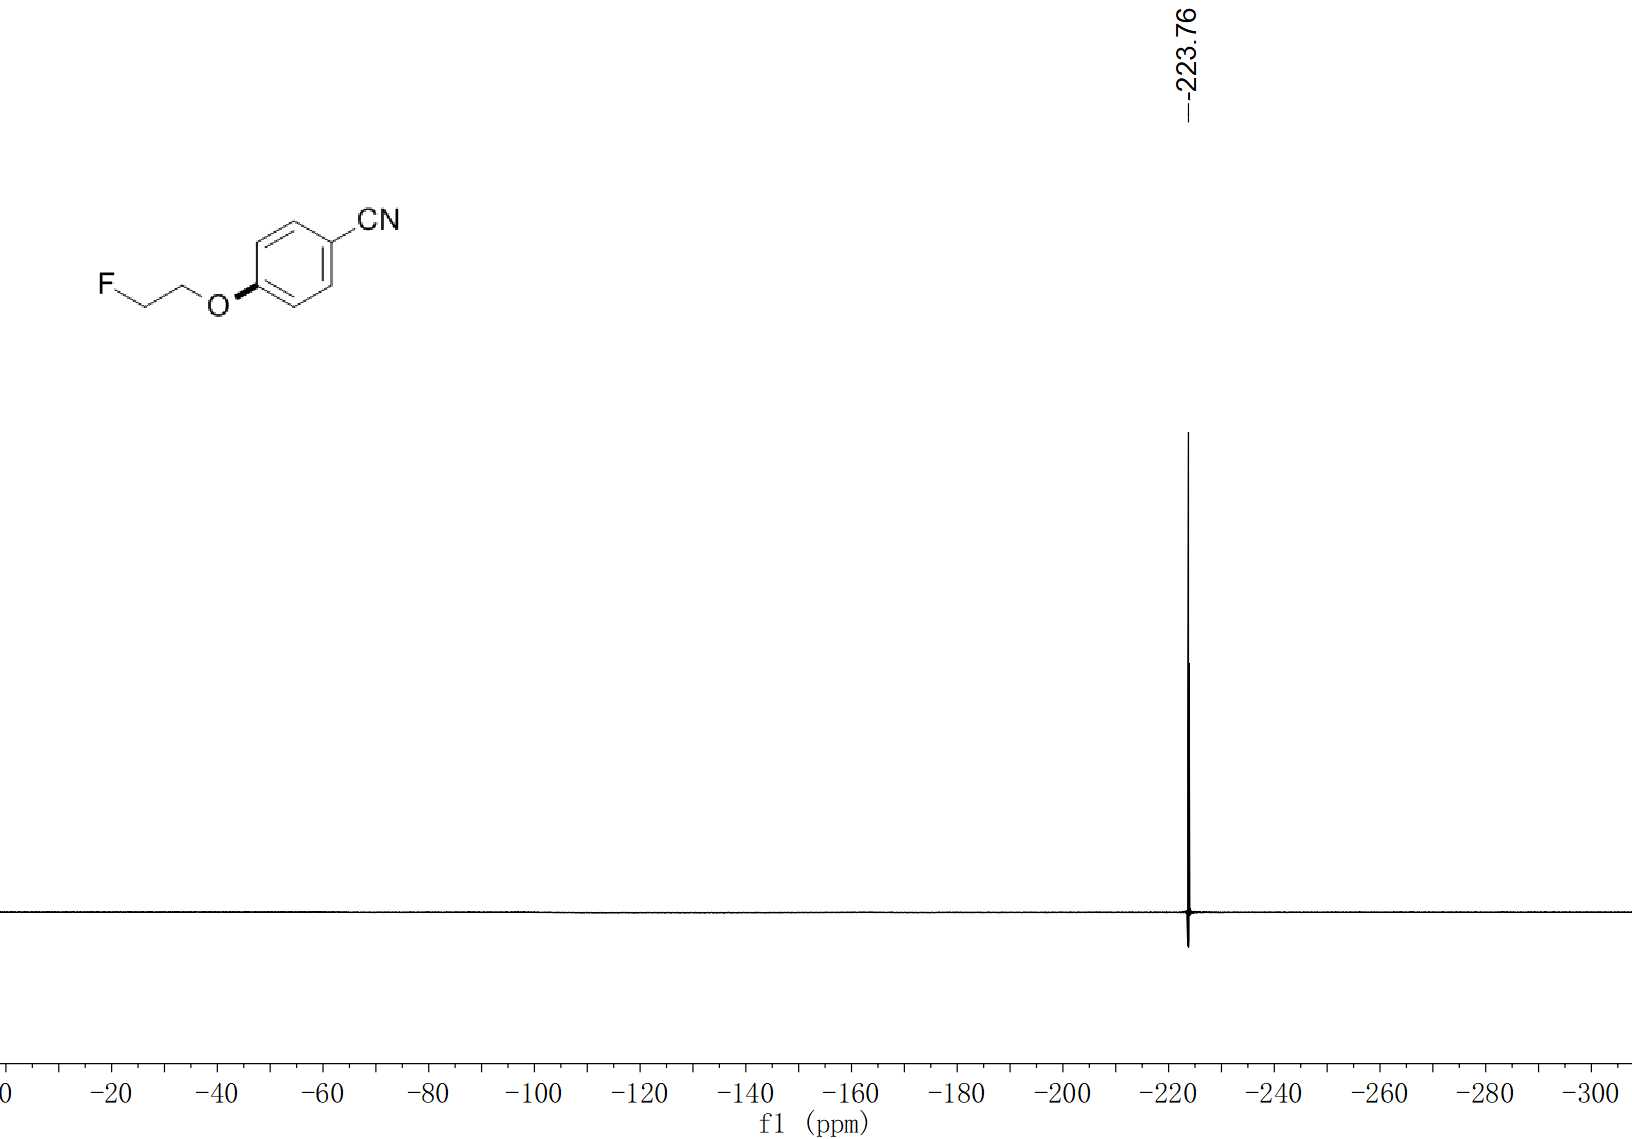


**21** 19F NMR (376 MHz, CDCl3)


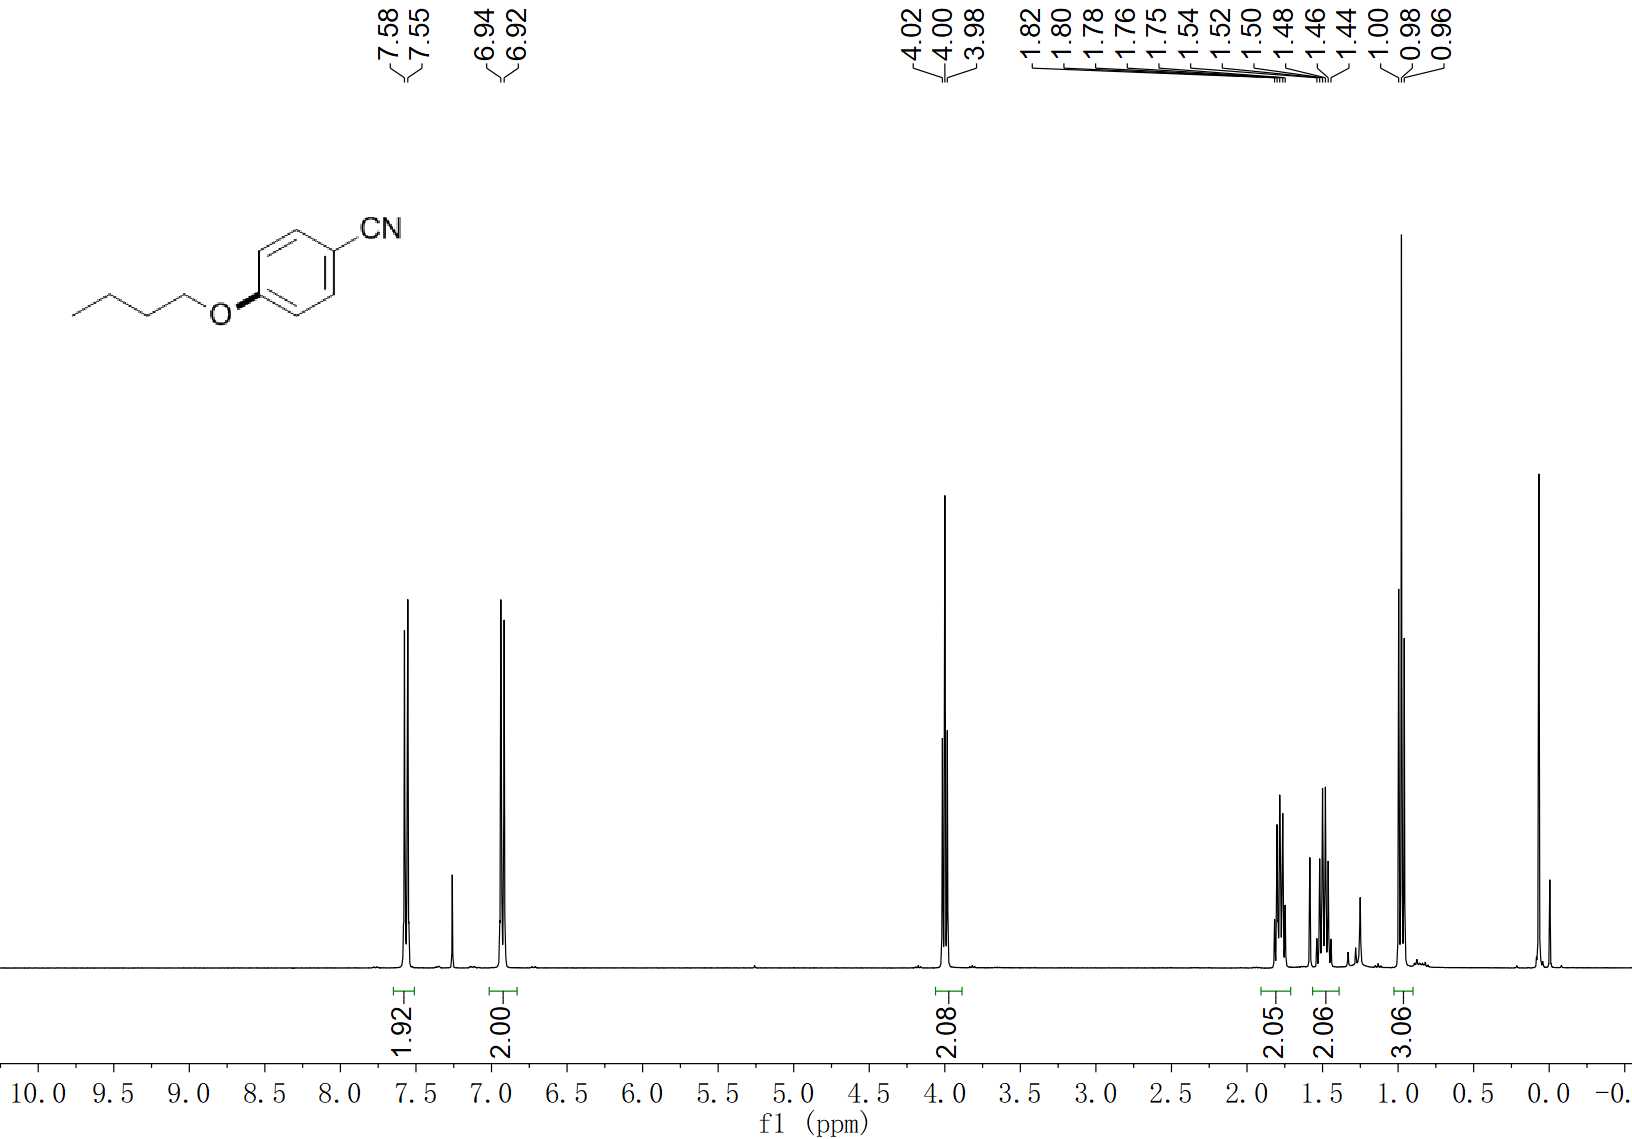


**22** 1H NMR (400 MHz, CDCl3)


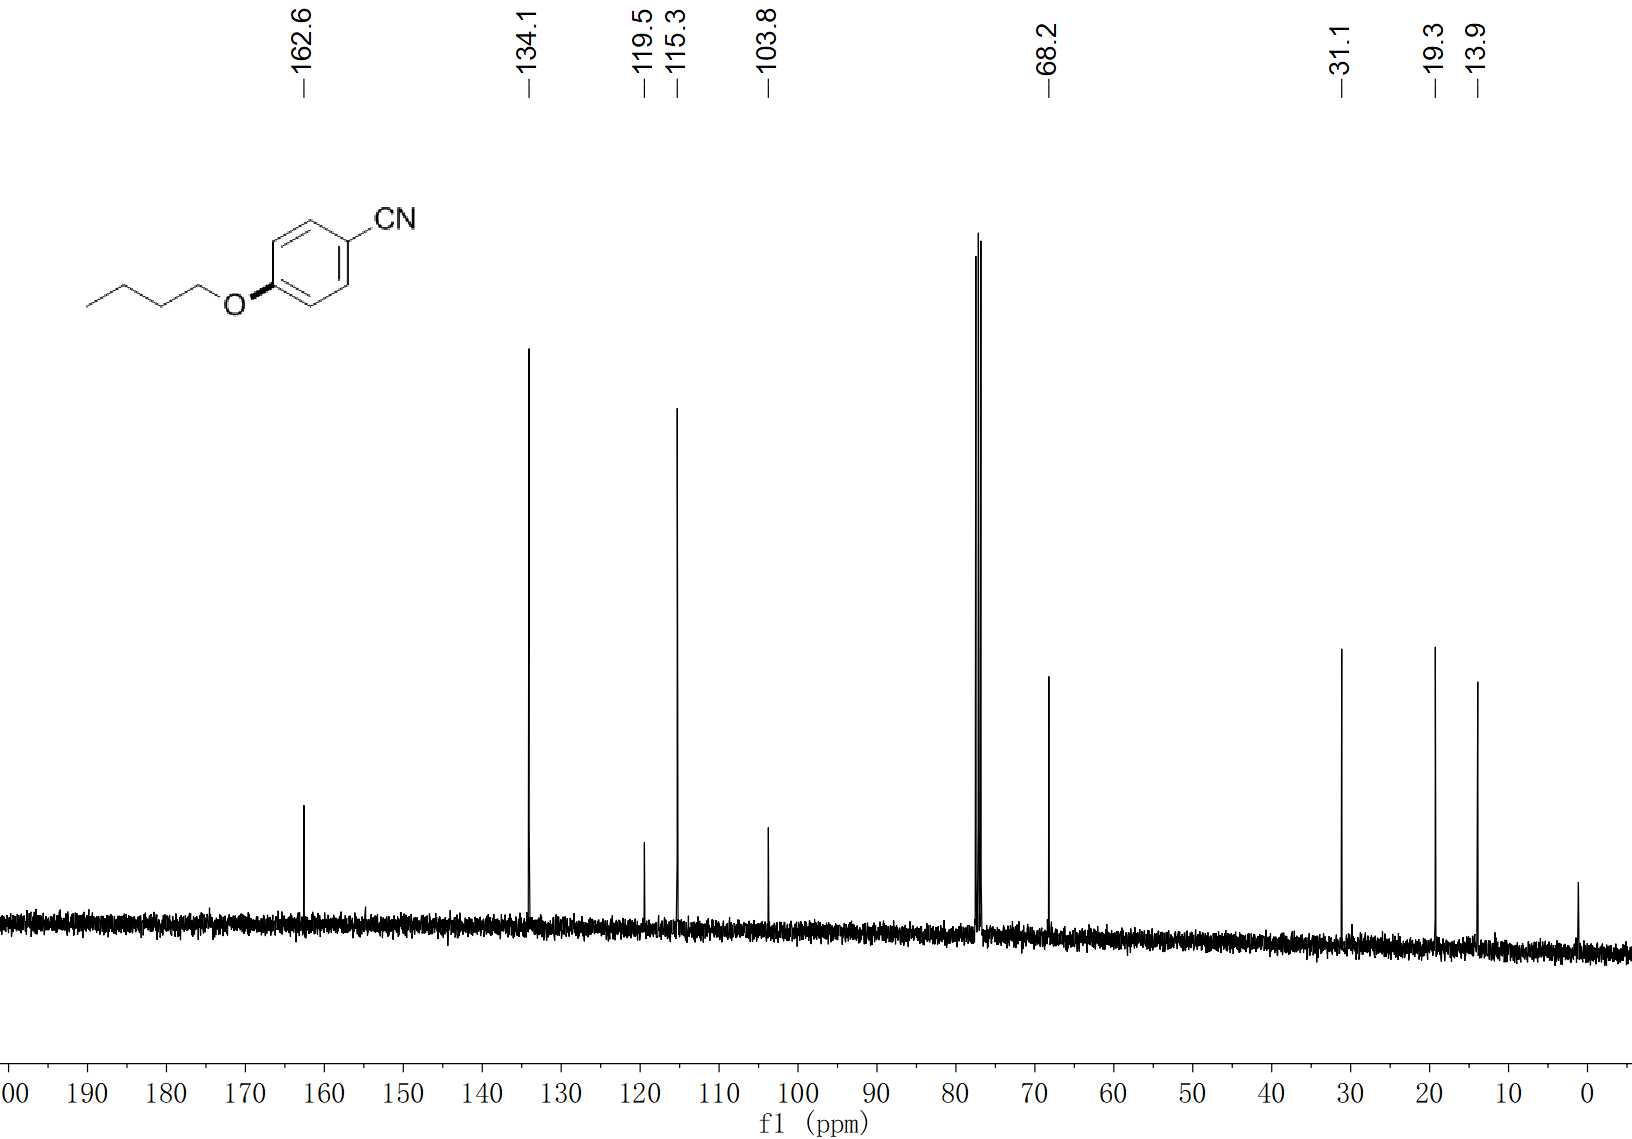


**22** 13C NMR (100 MHz, CDCl3)


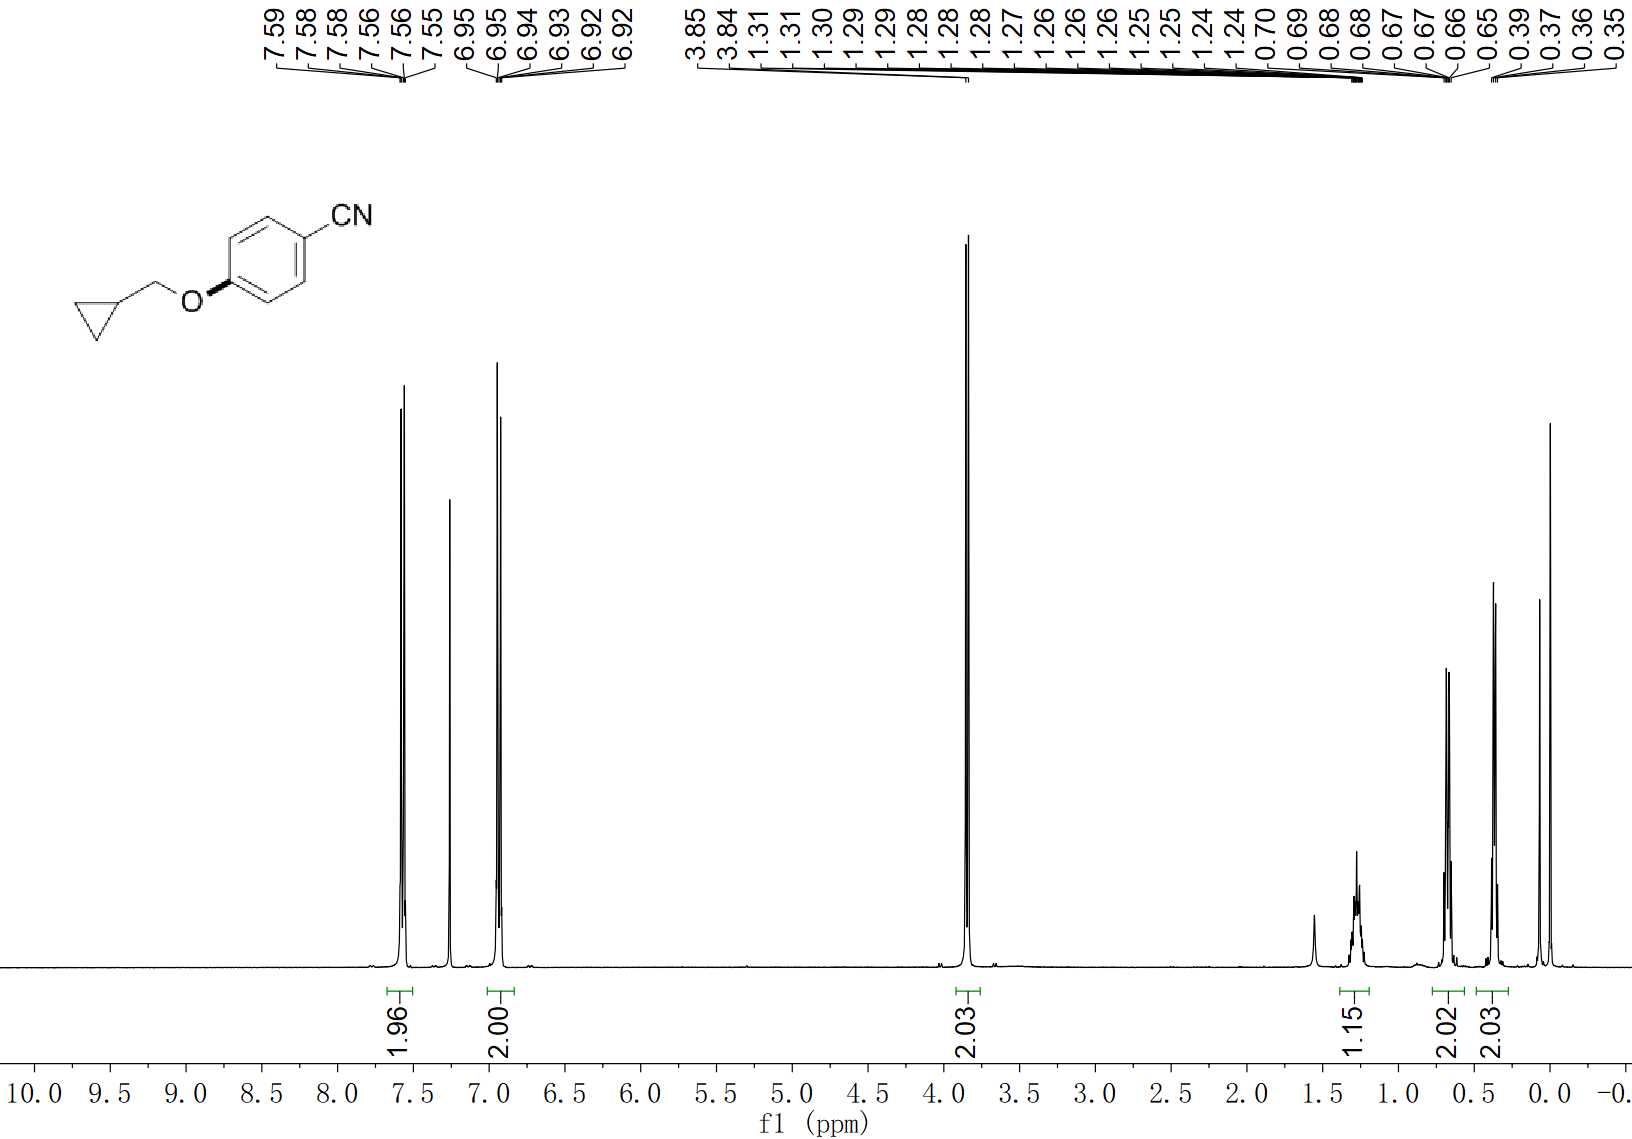


**23** 1H NMR (400 MHz, CDCl3)


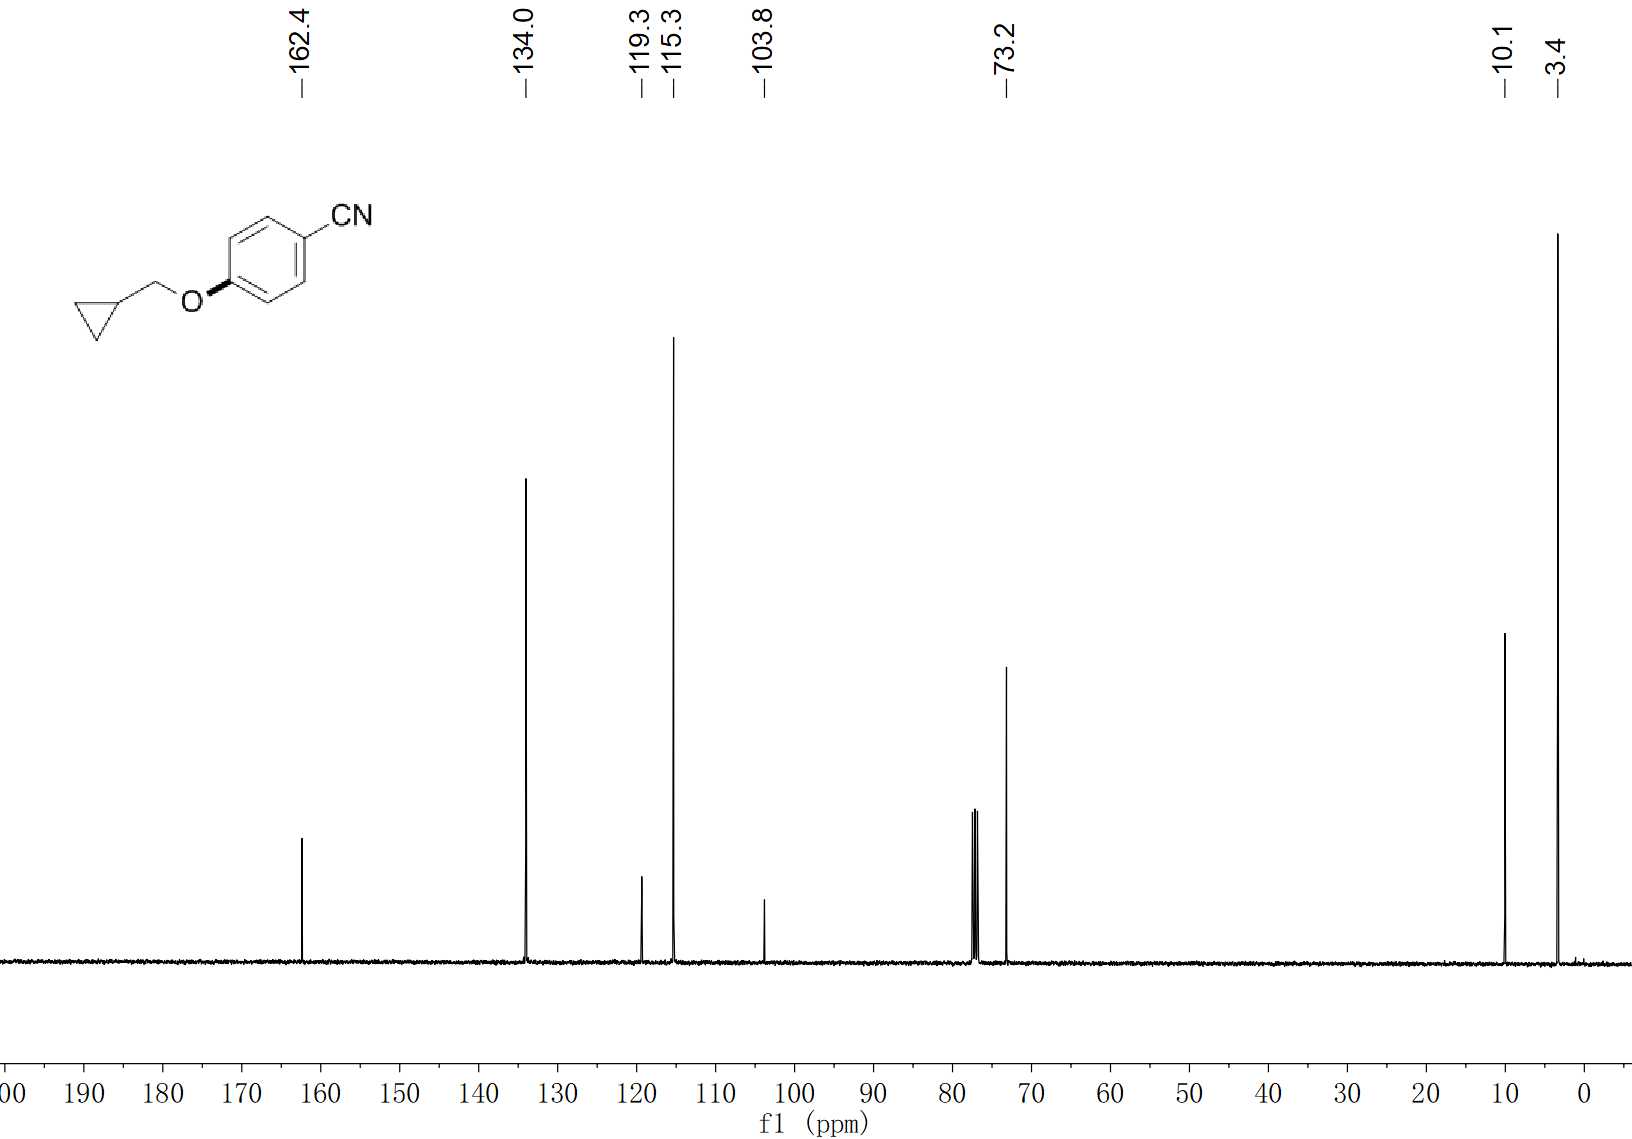


**23** 13C NMR (100 MHz, CDCl3)


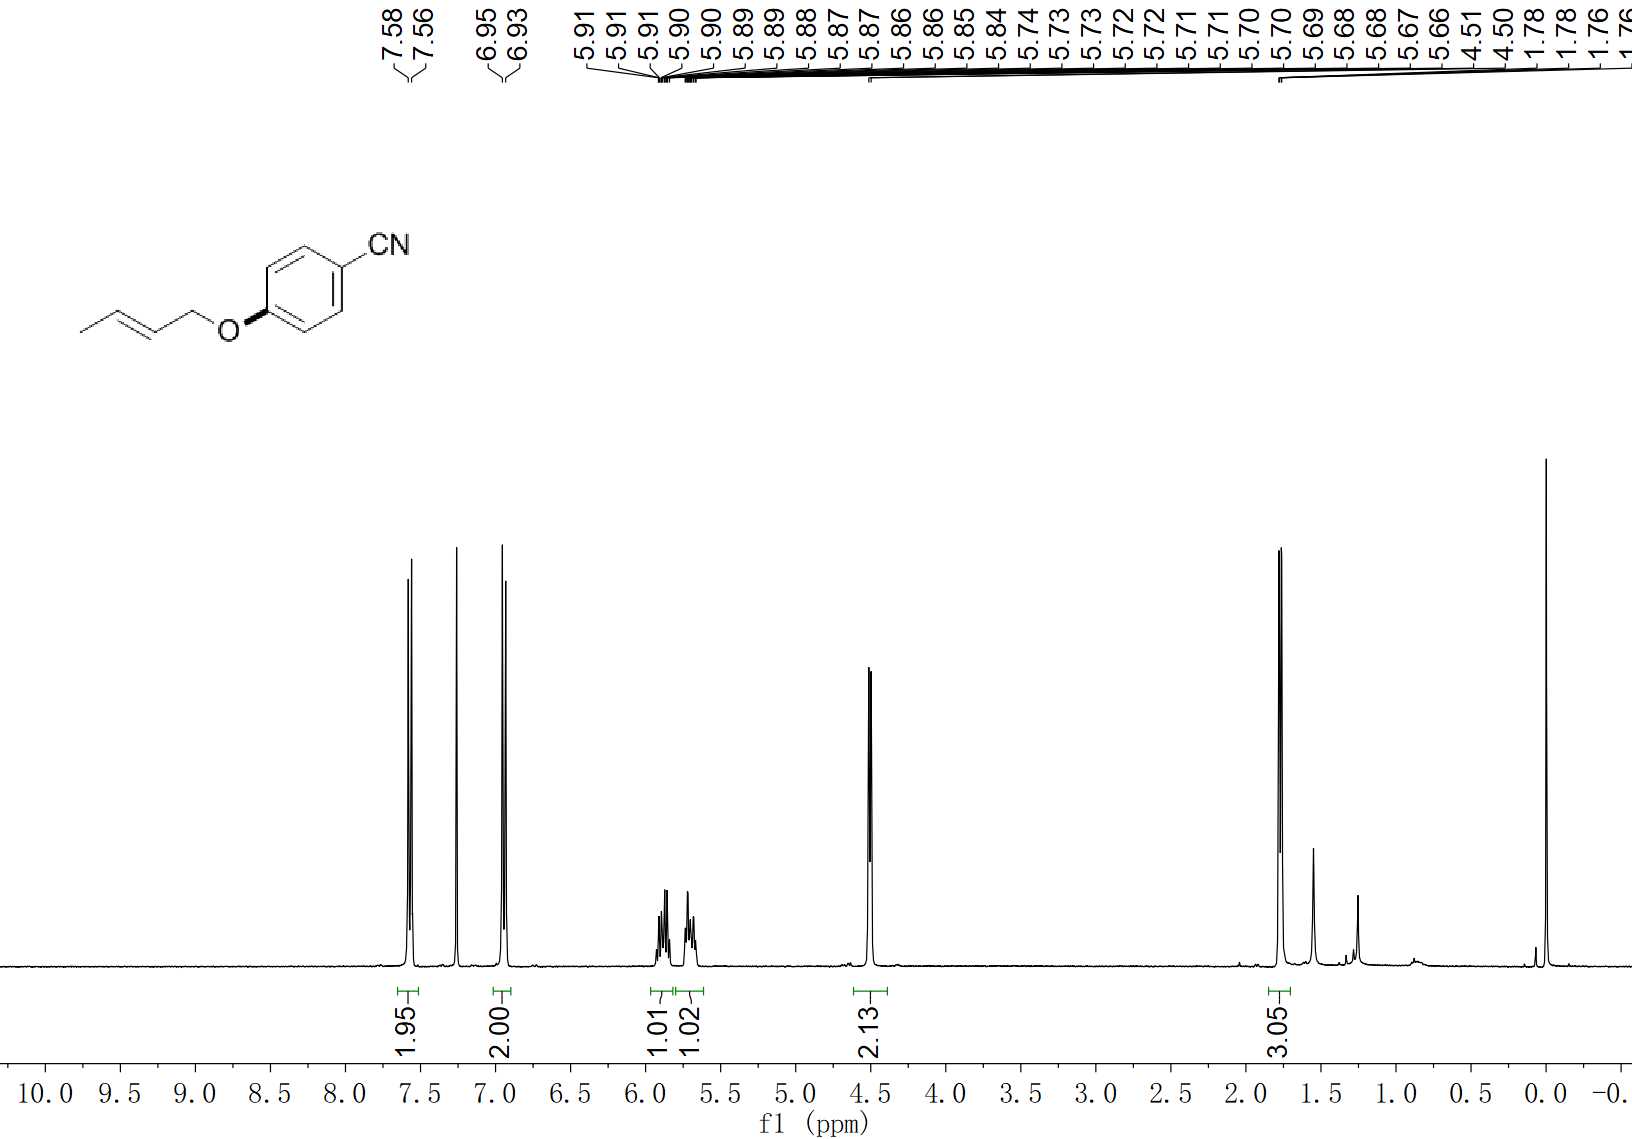


**24** 1H NMR (400 MHz, CDCl3)


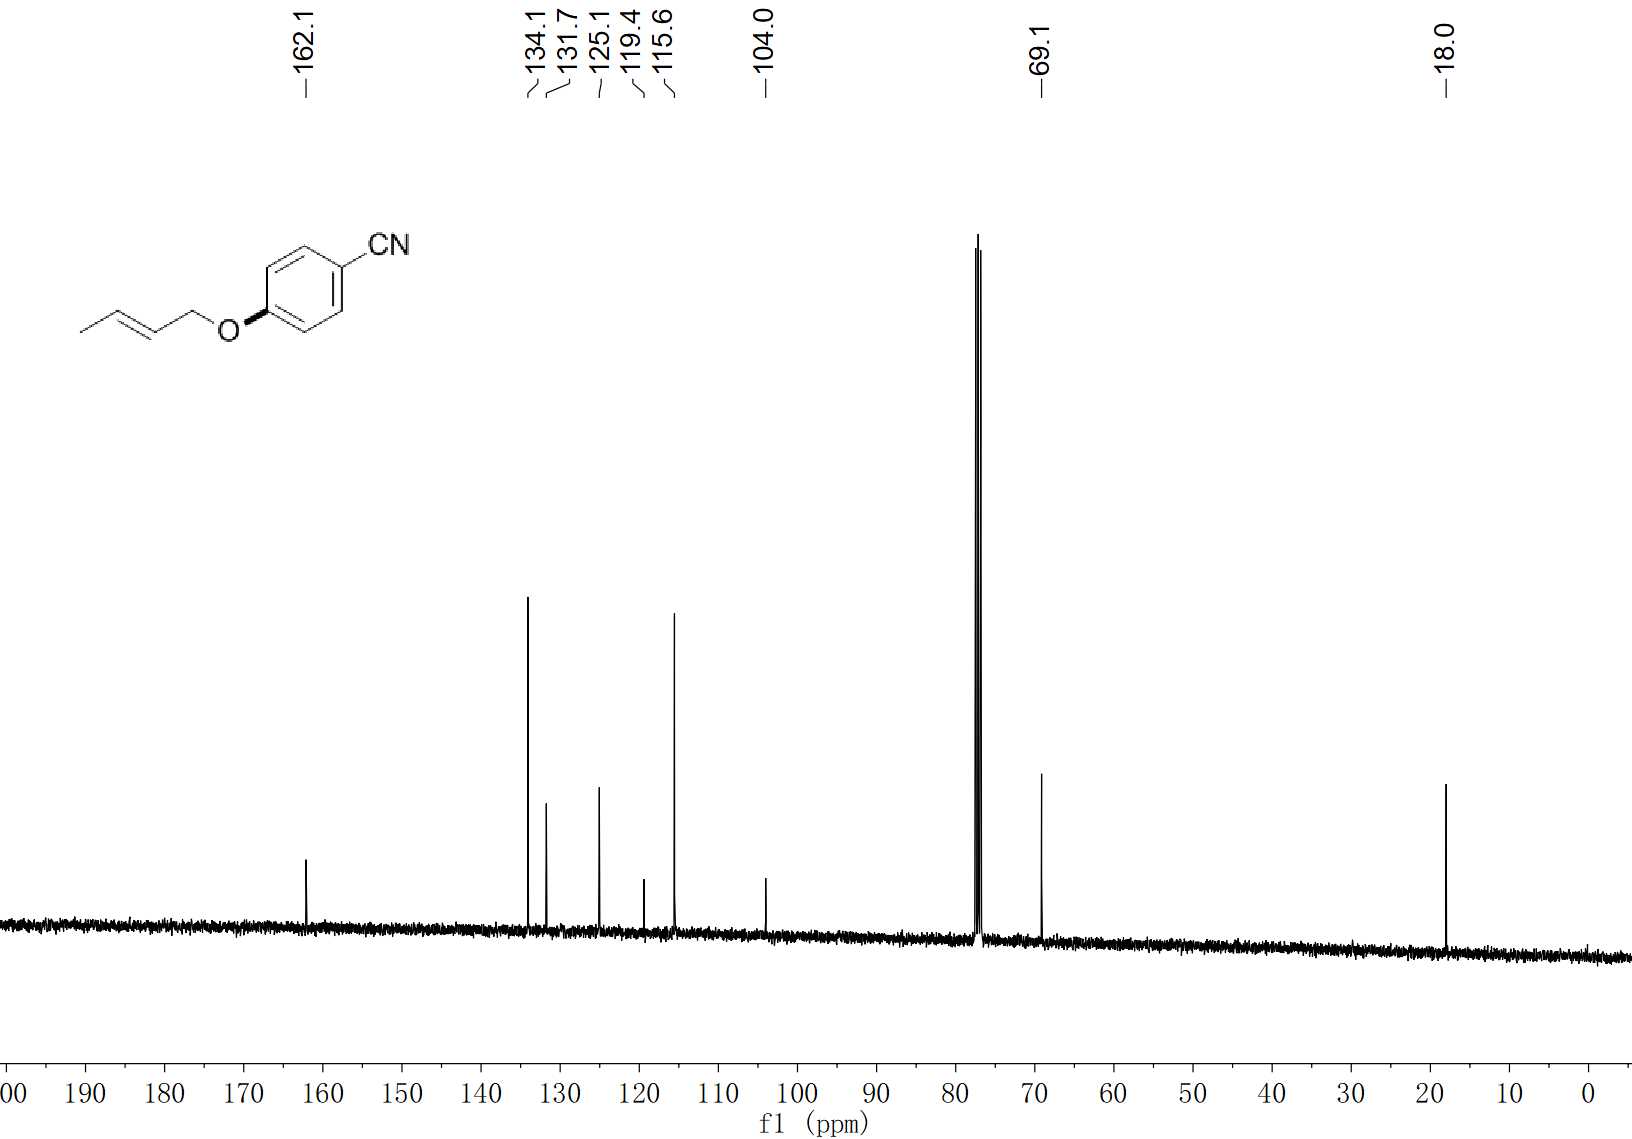


**24** 13C NMR (100 MHz, CDCl3)


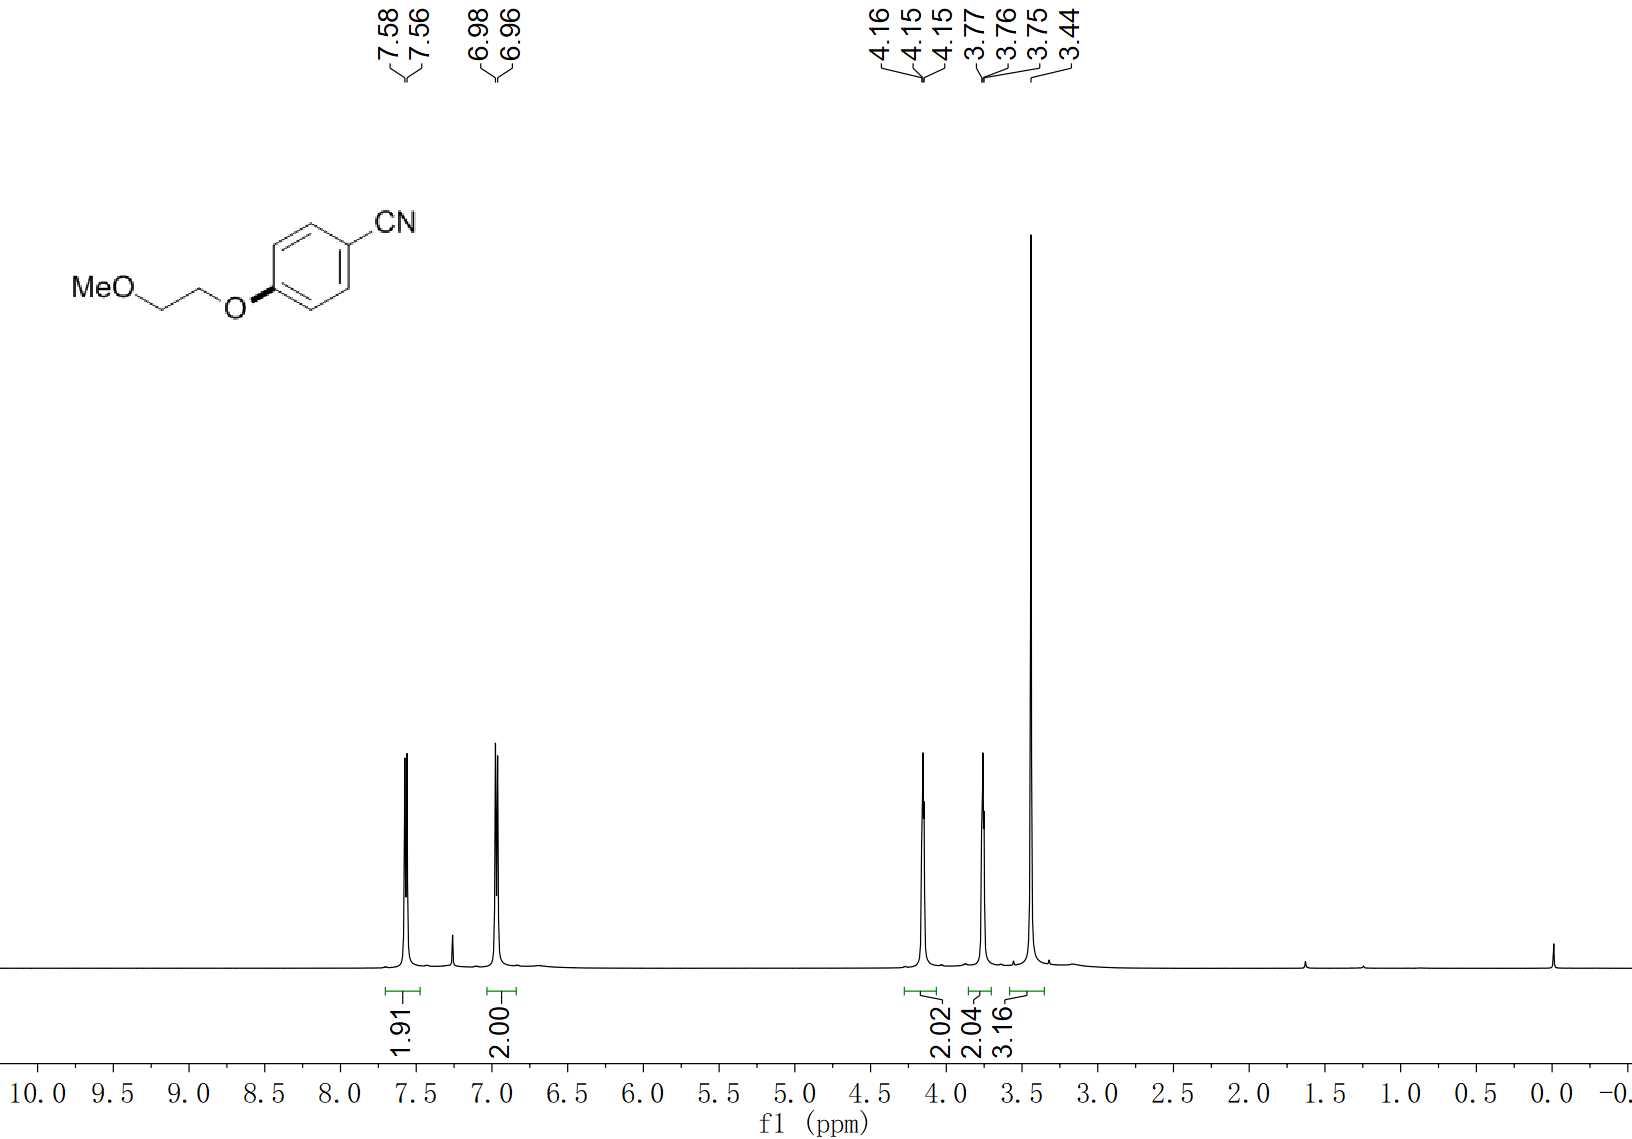


**25** 1H NMR (600 MHz, CDCl3)


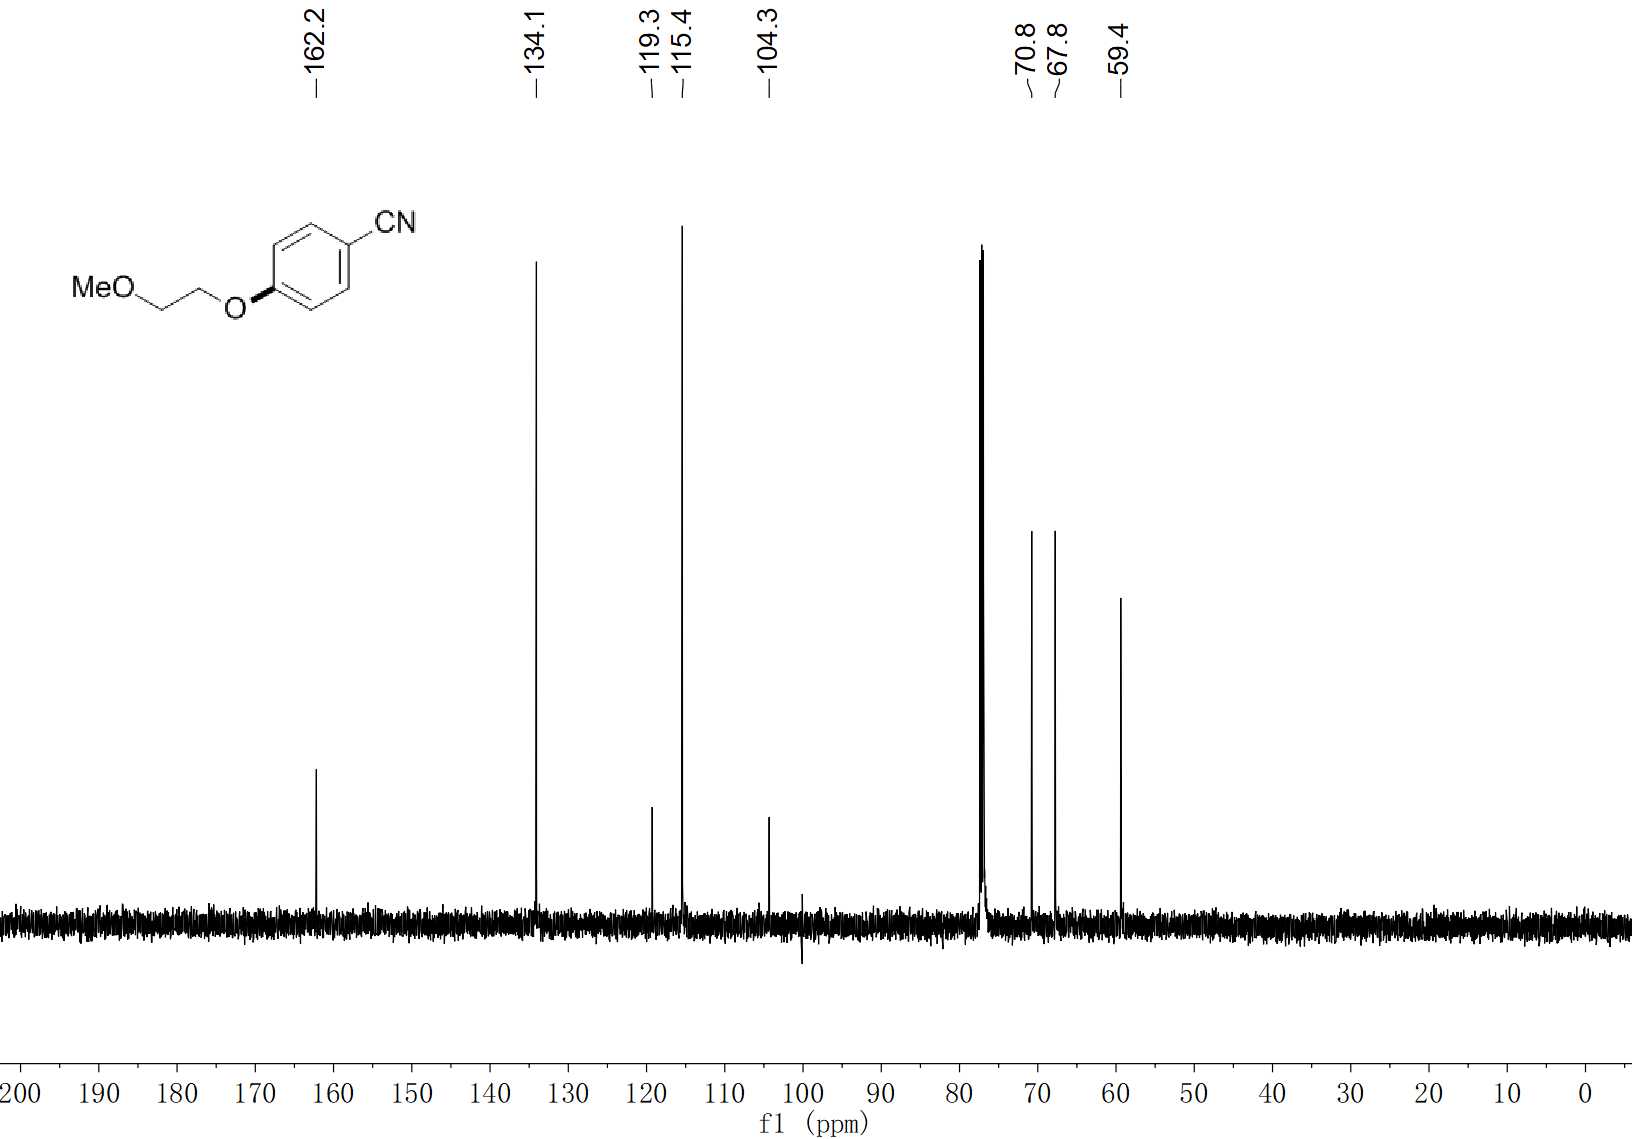


**25** 13C NMR (150 MHz, CDCl3)


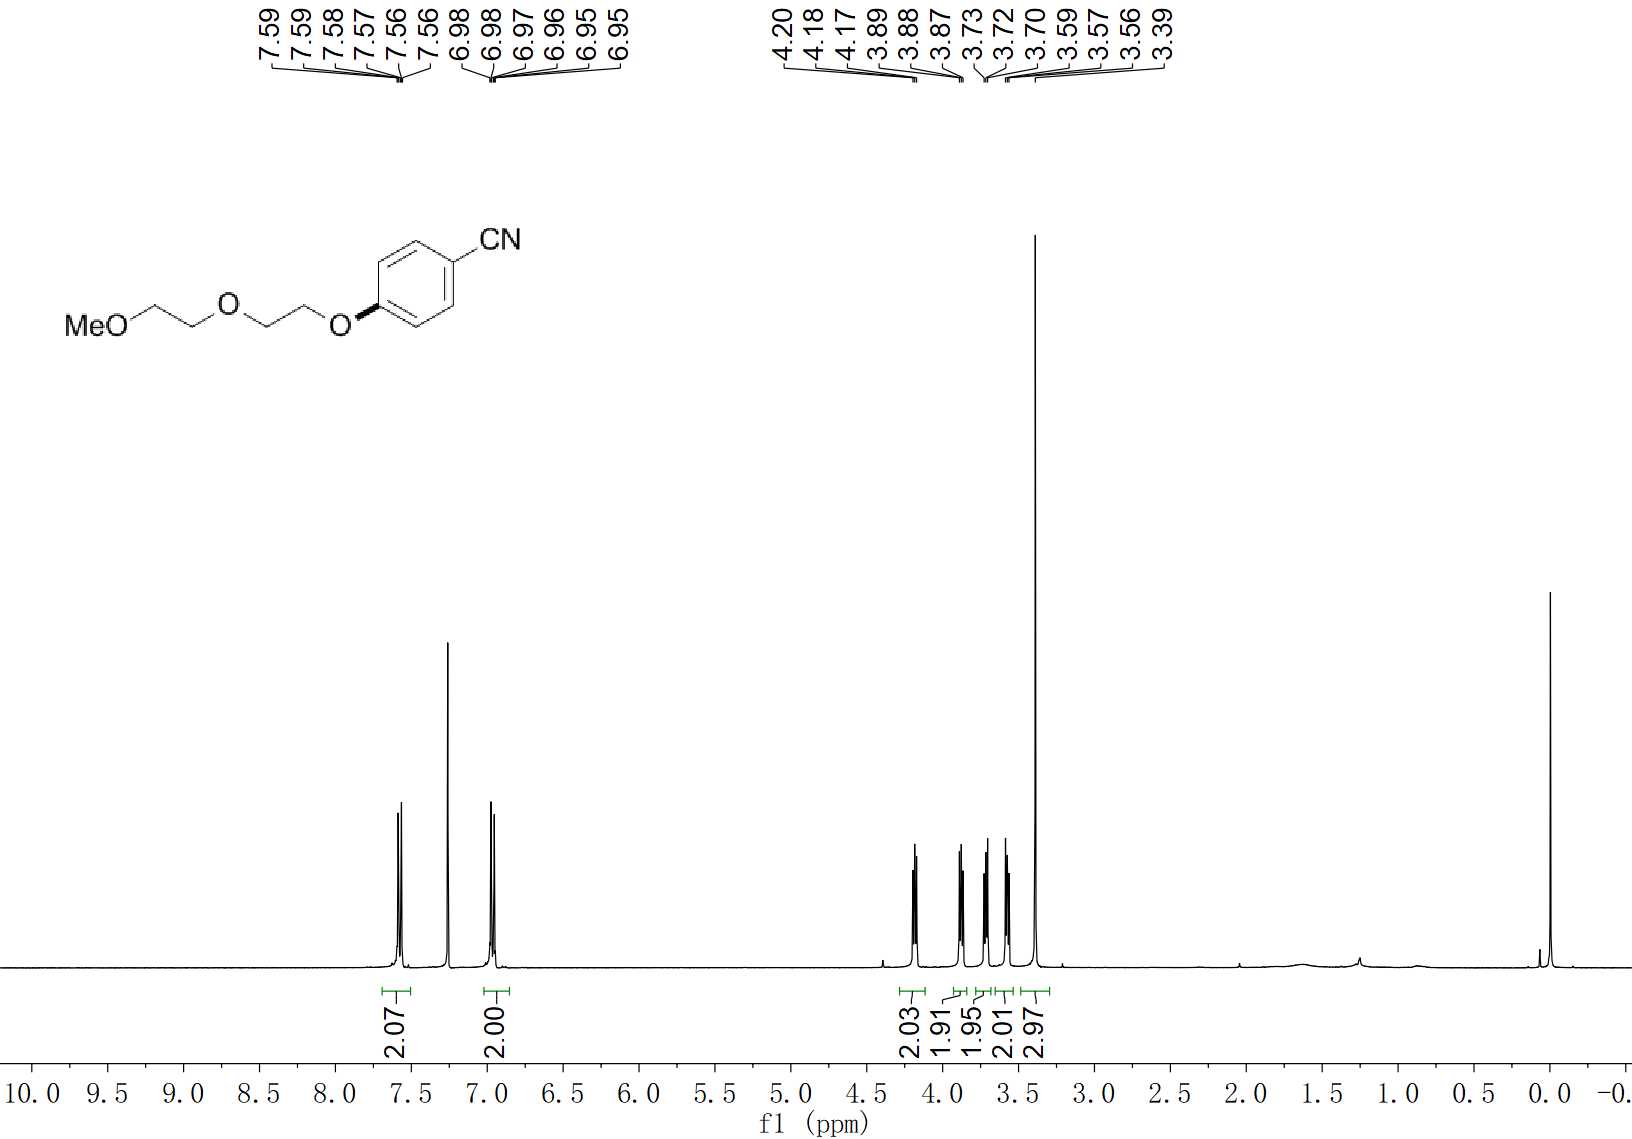


**26** 1H NMR (400 MHz, CDCl3)


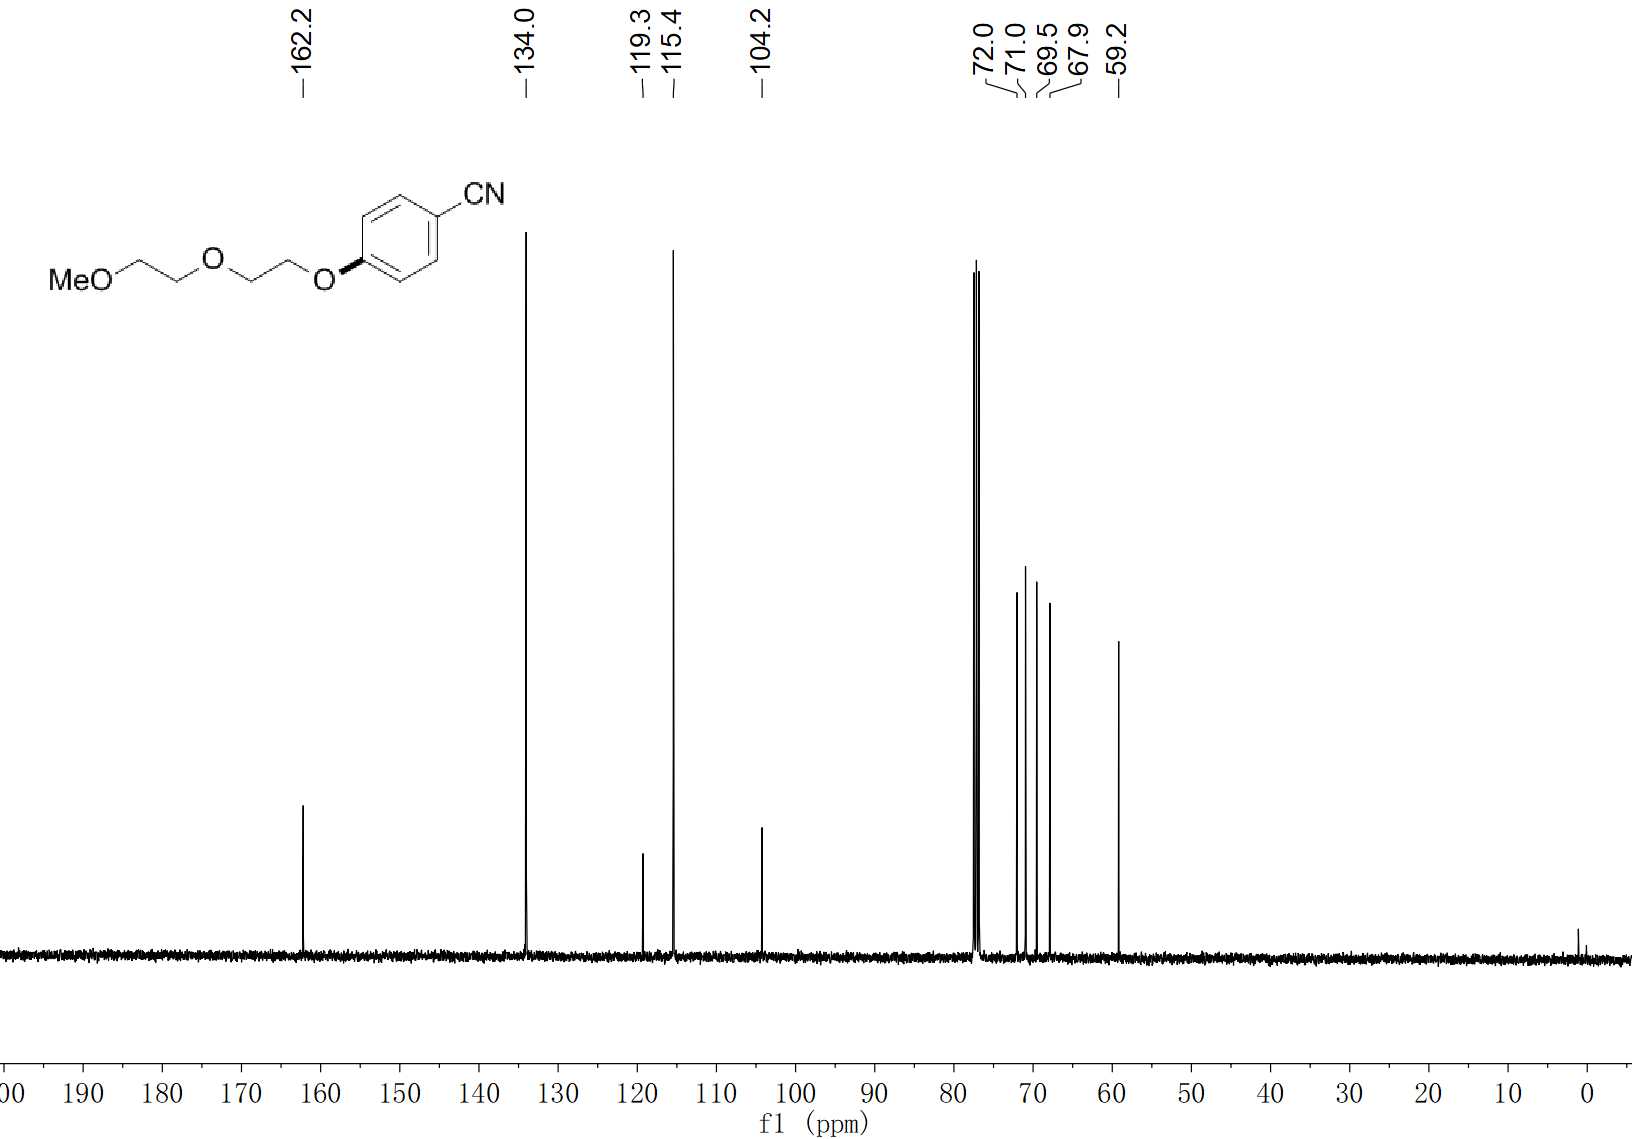


**26** 13C NMR (100 MHz, CDCl3)


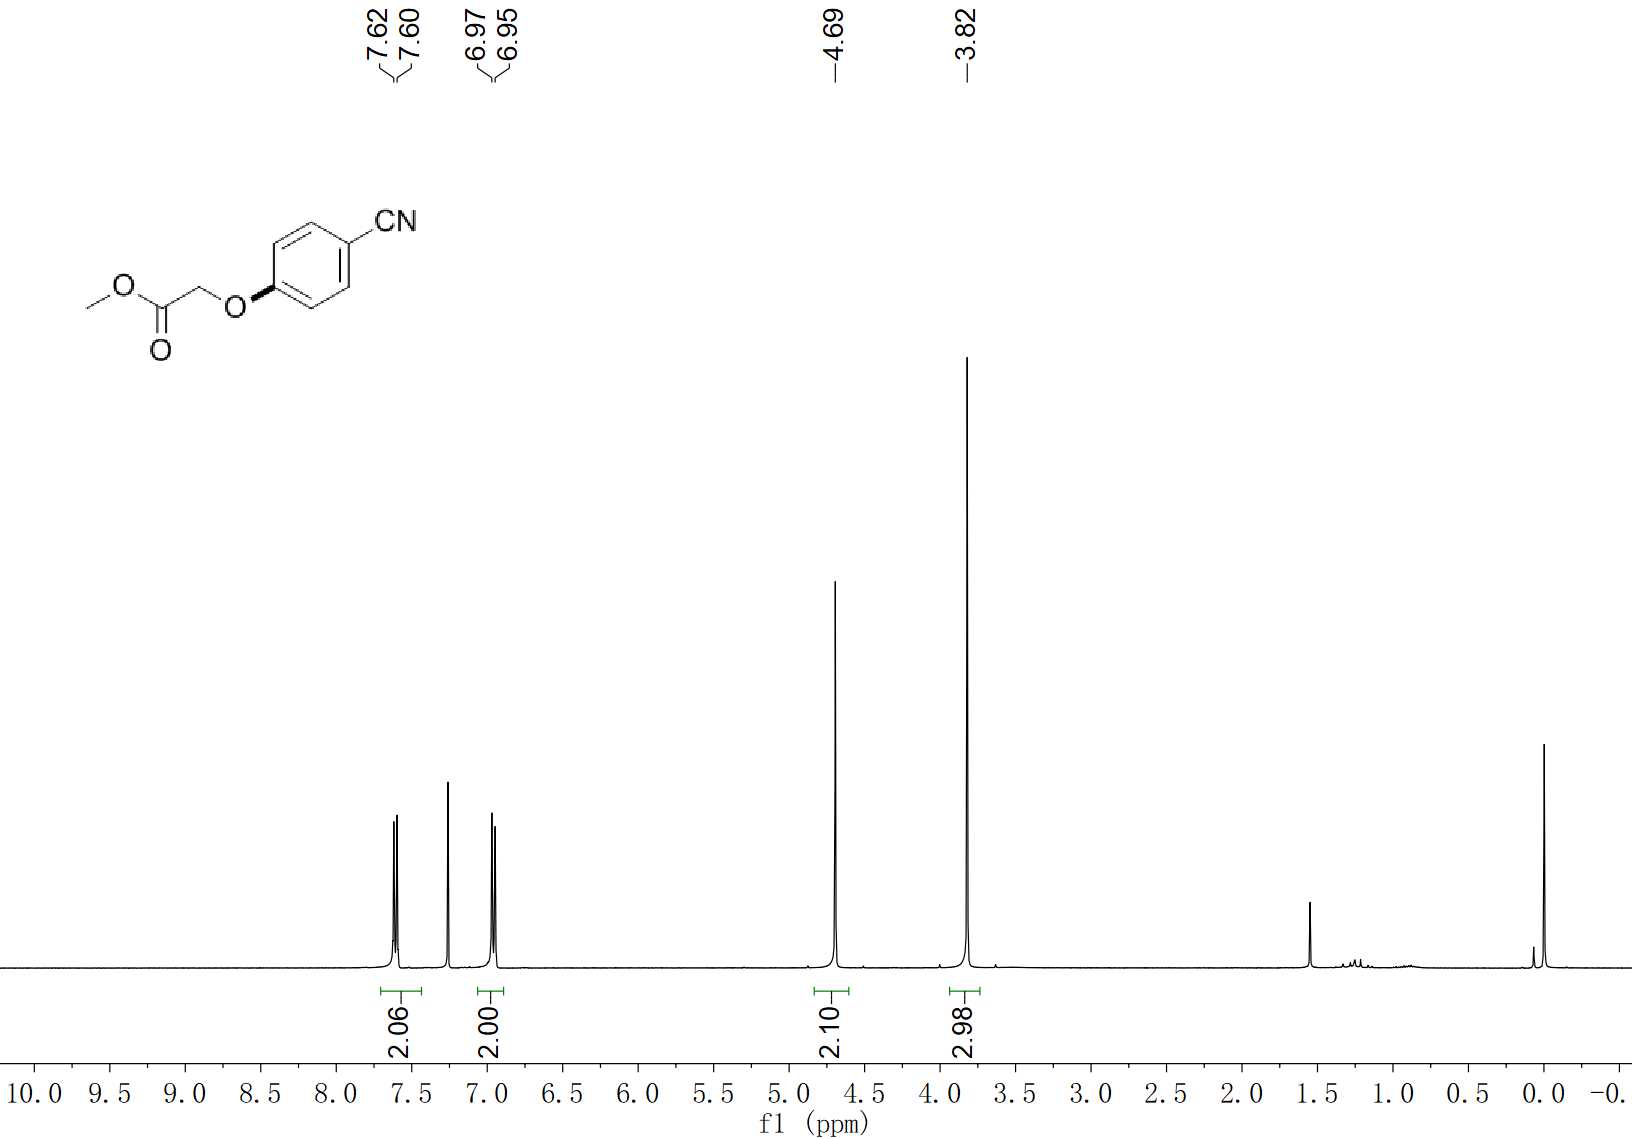


**27** 1H NMR (400 MHz, CDCl3)


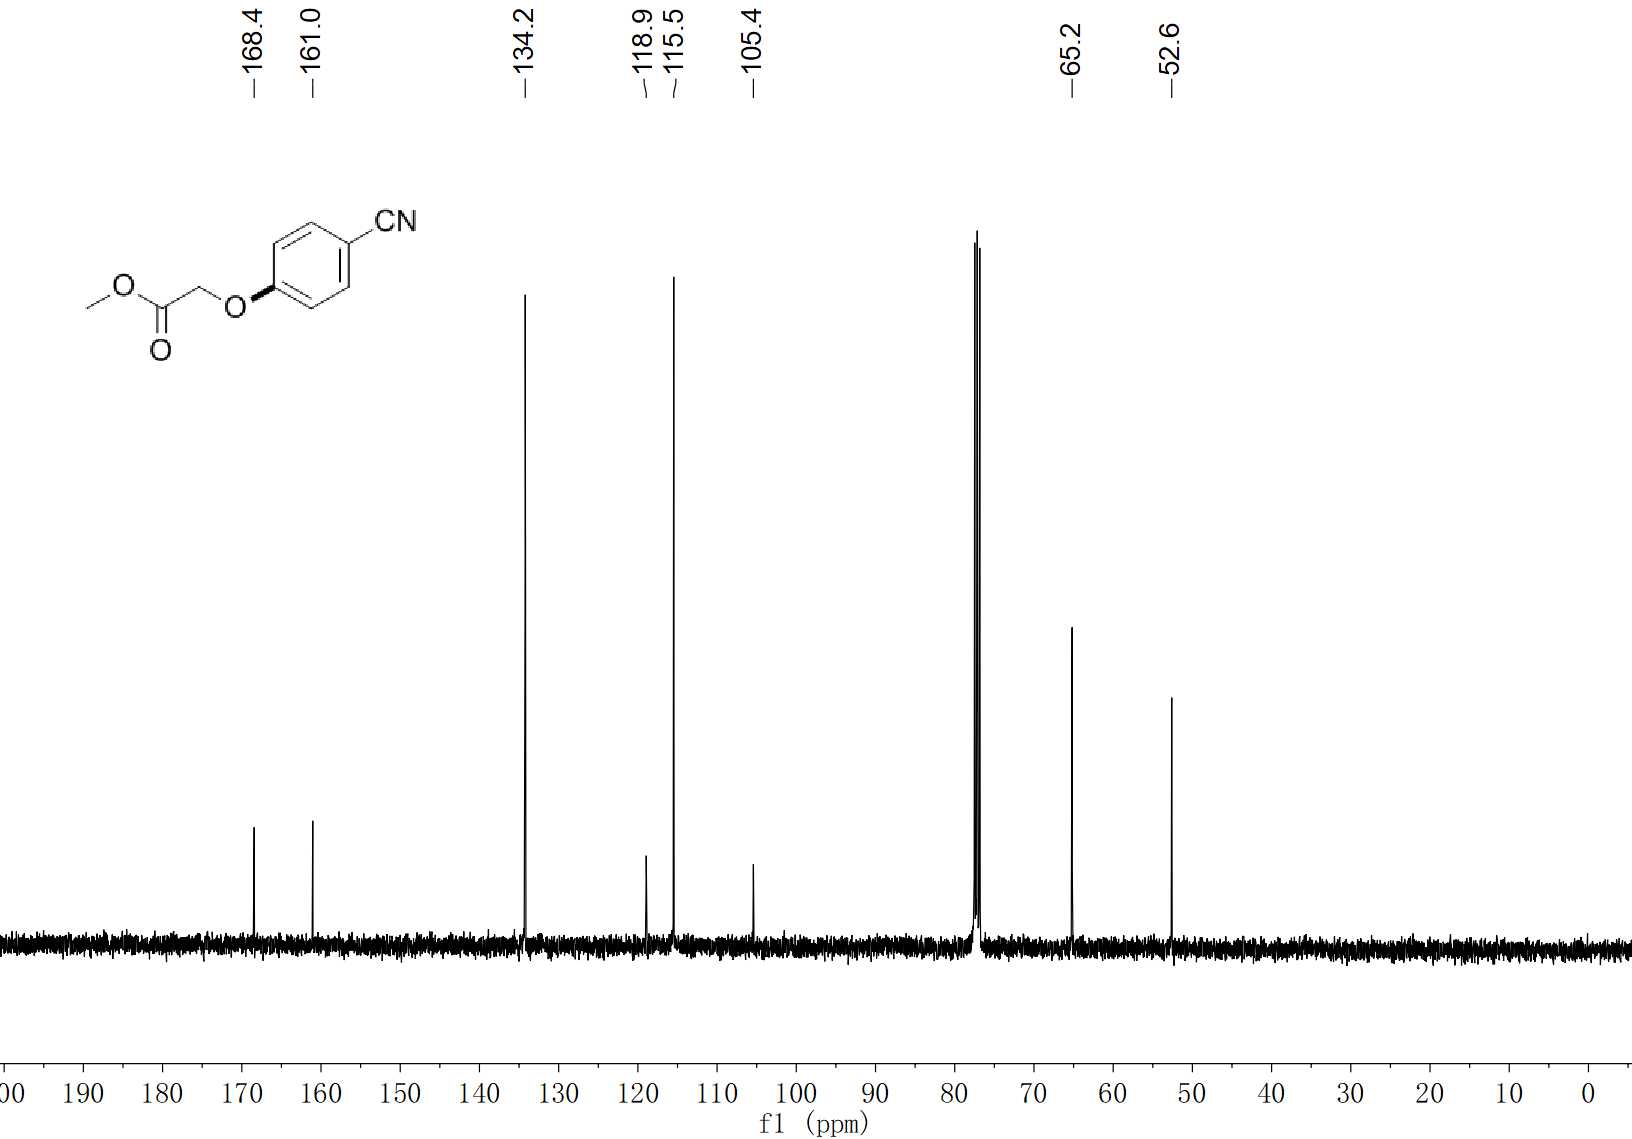


**27** 13C NMR (100 MHz, CDCl3)


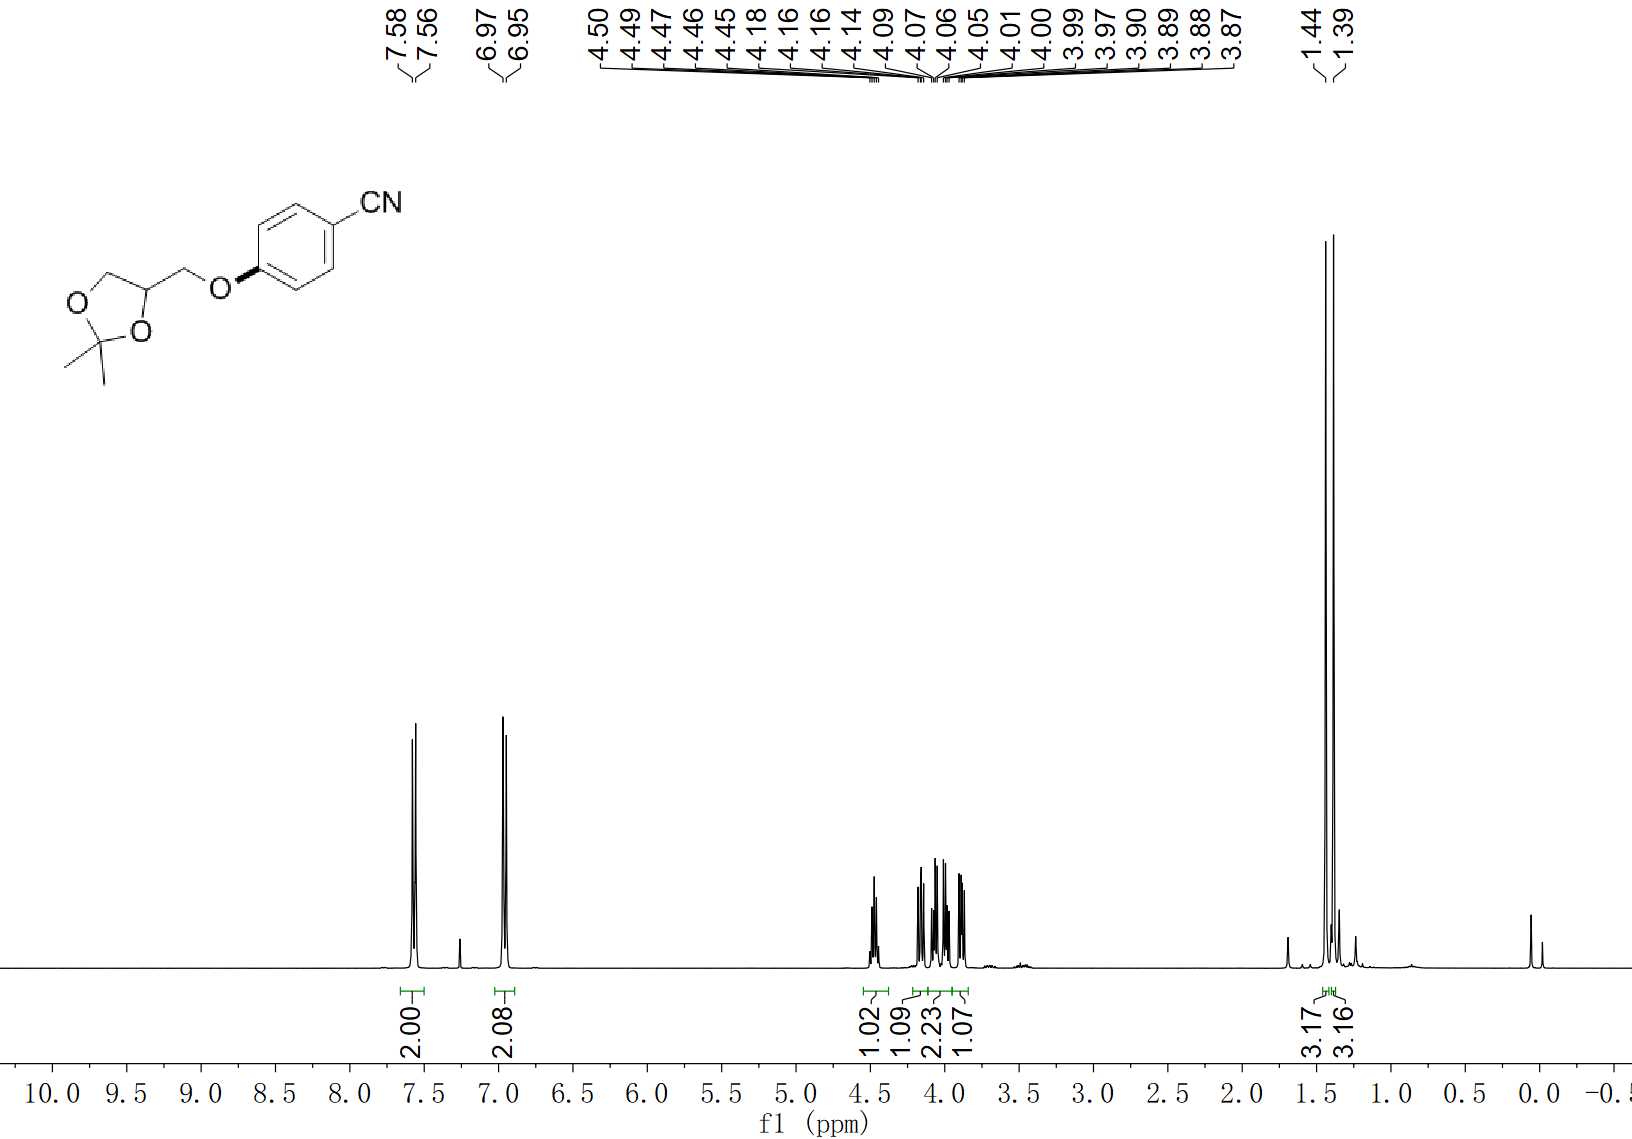


**28** 1H NMR (400 MHz, CDCl3)

**28** 13C NMR (100 MHz, CDCl3)

**29** 1H NMR (400 MHz, CDCl3)

**29** 13C NMR (100 MHz, CDCl3)

**30** 1H NMR (400 MHz, CDCl3)

**30** 13C NMR (100 MHz, CDCl3)

**31** 1H NMR (400 MHz, CDCl3)

**31** 13C NMR (100 MHz, CDCl3)

**32** 1H NMR (300 MHz, CDCl3)

**32** 13C NMR (100 MHz, CDCl3)

**33** 1H NMR (400 MHz, CDCl3)

**33** 13C NMR (100 MHz, CDCl3)

**34** 1H NMR (400 MHz, CDCl3)

**34** 13C NMR (100 MHz, CDCl3)

**35** 1H NMR (400 MHz, CDCl3)

**35** 13C NMR (100 MHz, CDCl3)

**36** 1H NMR (400 MHz, CDCl3)

**36** 13C NMR (100 MHz, CDCl3)

**37** 1H NMR (400 MHz, CDCl3)

**37** 13C NMR (100 MHz, CDCl3)

**38** 1H NMR (400 MHz, CDCl3)

**38** 13C NMR (100 MHz, CDCl3)

**39** 1H NMR (400 MHz, CDCl3)

**39** 13C NMR (100 MHz, CDCl3)

**40** 1H NMR (400 MHz, CDCl3)

**40** 13C NMR (100 MHz, CDCl3)

**41** 1H NMR (400 MHz, CDCl3)

**41** 13C NMR (100 MHz, CDCl3)

**42** 1H NMR (400 MHz, CDCl3)

**42** 13C NMR (100 MHz, CDCl3)

**43-1** 1H NMR (600 MHz, CDCl3)

**43-1** 13C NMR (150 MHz, CDCl3)

**43-2** 1H NMR (600 MHz, CDCl3)

**43-2** 13C NMR (150 MHz, CDCl3)

**44** 1H NMR (400 MHz, CDCl3)

**44** 13C NMR (100 MHz, CDCl3)

**45** 1H NMR (400 MHz, CDCl3)

**45** 13C NMR (100 MHz, CDCl3)

**46** 1H NMR (400 MHz, CDCl3)

**46** 13C NMR (100 MHz, CDCl3)

**47** 1H NMR (400 MHz, CDCl3)

**47** 13C NMR (100 MHz, CDCl3)

**48** 1H NMR (400 MHz, CDCl3)

**48** 13C NMR (100 MHz, CDCl3)

**48** 19F NMR (376 MHz, CDCl3)

**49** 1H NMR (400 MHz, CDCl3)

**49** 13C NMR (100 MHz, CDCl3)

**50** 1H NMR (400 MHz, CDCl3)

**50** 13C NMR (100 MHz, CDCl3)

**51** 1H NMR (400 MHz, CDCl3)

**51** 13C NMR (100 MHz, CDCl3)

**52** 1H NMR (400 MHz, CDCl3)

**52** 13C NMR (100 MHz, CDCl3)

**53** 1H NMR (400 MHz, CDCl3)

**53** 13C NMR (100 MHz, CDCl3)

**53** 19F NMR (376 MHz, CDCl3)

**54** 1H NMR (400 MHz, CDCl3)

**54** 13C NMR (100 MHz, CDCl3)

**55** 1H NMR (400 MHz, CDCl3)

**55** 13C NMR (100 MHz, CDCl3)

**56** 1H NMR (400 MHz, CDCl3)

**56** 13C NMR (100 MHz, CDCl3)

**57** 1H NMR (400 MHz, CDCl3)

**57** 13C NMR (100 MHz, CDCl3)

**58** 1H NMR (400 MHz, CDCl3)

**58** 13C NMR (100 MHz, CDCl3)

**59** 1H NMR (400 MHz, CDCl3)

**59** 13C NMR (100 MHz, CDCl3)

**60** 1H NMR (600 MHz, CDCl3)

**60** 13C NMR (150 MHz, CDCl3)

**61** 1H NMR (600 MHz, CDCl3)

**61** 13C NMR (150 MHz, CDCl3)

**62** 1H NMR (400 MHz, CDCl3)

**62** 13C NMR (100 MHz, CDCl3)

**63** 1H NMR (600 MHz, CDCl3)

**63** 13C NMR (150 MHz, CDCl3)

**64** 1H NMR (600 MHz, CDCl3)

**64** 13C NMR (150 MHz, CDCl3)

**65** 1H NMR (600 MHz, CDCl3)

**65** 13C NMR (150 MHz, CDCl3)

**65** 19F NMR (376 MHz, CDCl3)

**66** 1H NMR (600 MHz, CDCl3)

**66** 13C NMR (150 MHz, CDCl3)

**66** 19F NMR (376 MHz, CDCl3)

**67** 1H NMR (300 MHz, CDCl3)

**67** 13C NMR (150 MHz, CDCl3)

**67** 19F NMR (376 MHz, CDCl3)

**70** 1H NMR (400 MHz, CDCl3)

**70** 13C NMR (100 MHz, CDCl3)

**72** 1H NMR (400 MHz, CDCl3)

**72** 13C NMR (100 MHz, CDCl3)

**73-*C2*** 1H NMR (400 MHz, CDCl3)

**73-*C2*** 13C NMR (100 MHz, CDCl3)

**73-*C3*** 1H NMR (400 MHz, CDCl3)

**73-*C3*** 13C NMR (100 MHz, CDCl3)

**74** 1H NMR (400 MHz, CDCl3)

**74** 13C NMR (100 MHz, CDCl3)

**75-*C3*** 1H NMR (600 MHz, CDCl3)

**75-*C3*** 13C NMR (100 MHz, CDCl3)

**75-*C3*** 19F NMR (376 MHz, CDCl3)

**75-*C5*** 1H NMR (600 MHz, CDCl3)

**75-*C5*** 13C NMR (100 MHz, CDCl3)

**75-*C5*** 19F NMR (376 MHz, CDCl3)

**76-*C3*** 1H NMR (600 MHz, CDCl3)

**76-*C3*** 13C NMR (100 MHz, CDCl3)

**76-*C3*** 19F NMR (376 MHz, CDCl3)

**76-*C5*** 1H NMR (600 MHz, CDCl3)

**76-*C5*** 13C NMR (100 MHz, CDCl3)

**76-*C5*** 19F NMR (376 MHz, CDCl3)

**77** 1H NMR (600 MHz, CDCl3)

**77** 13C NMR (150 MHz, CDCl3)

**78** 1H NMR (600 MHz, DMSO-*d*6)

**78** 13C NMR (150 MHz, DMSO-*d*6)

**79** 1H NMR (400 MHz, DMSO-*d*6)

**79** 13C NMR (100 MHz, DMSO-*d*6)
